# Supplementary material
Source: PubMed Central journal article supplement (PMC8038972)

## Supplemental Information | Snetkova et al. *Ultraconserved Enhancer Function Does Not Require Perfect Sequence Conservation.*

### Supplemental Tables

5 **Table S1:** Loss of function results from ultraconserved enhancer mutagenesis. P-values and FASTA sequences of reference and mutated alleles (provided separately).

**Table S2:** Gain of function results from ultraconserved enhancer mutagenesis. P-values and FASTA sequences of reference and mutated alleles (provided separately).

**Table S3.** Details for hs122 mutated enhancer knock-in animals phenotyped for dentate gyrus abnormalities.

| Mouse line | Sample (mouse tag#) | Genotype  | Age | Sex  | Dentate Gyrus Length ( $\mu\text{m}$ ) |
|------------|---------------------|-----------|-----|------|----------------------------------------|
| hs122mut   | E1594               | Wild-type | P32 | Male | 1962.08699                             |
|            | E1596               | Wild-type | P32 | Male | 2126.84771                             |
|            | E1756               | Wild-type | P41 | Male | 1950.04569                             |
|            | E1595               | Knock-in  | P32 | Male | 1642.86569                             |
|            | E1598               | Knock-in  | P32 | Male | 1611.85219                             |
|            | E1755               | Knock-in  | P41 | Male | 1598.53229                             |
|            | E1757               | Knock-in  | P41 | Male | 1569.72977                             |

10 Ages are given in days after birth. Measurements of dentate gyrus length for each sample are the means from multiple measured sections (see **Methods**). For the plot in **Figure 5b**, measurements for knock-in animals were normalized by wild-type littermates. Raw measurements are plotted in **Extended Data Fig. 9**.

**Table S4.** Details for hs121 mutated enhancer knock-in animals phenotyped for abnormalities in VIP+ interneuron populations.

| Mouse line | Sample (mouse tag#) | Genotype  | Enhancer Activity of the Mutant Allele in the Transgenic Assay | Age | Sex  | Cell density (cells/mm <sup>2</sup> ) |
|------------|---------------------|-----------|----------------------------------------------------------------|-----|------|---------------------------------------|
| hs121mut1  | E1675               | Wild-type | N/A                                                            | P46 | Male | 60.87                                 |
|            | E1679               | Wild-type | N/A                                                            | P46 | Male | 56.83                                 |
|            | E1674               | Knock-in  | Active                                                         | P46 | Male | 58.41                                 |
|            | E1676               | Knock-in  | Active                                                         | P46 | Male | 58.96                                 |
|            | E1749               | Wild-type | N/A                                                            | P49 | Male | 64.24                                 |
|            | E1746               | Knock-in  | Active                                                         | P49 | Male | 67.76                                 |
|            | E1747               | Knock-in  | Active                                                         | P49 | Male | 59.81                                 |
| hs121mut2  | E1545               | Wild-type | N/A                                                            | P67 | Male | 54.88                                 |
|            | E1546               | Wild-type | N/A                                                            | P67 | Male | 52.53                                 |
|            | E1544               | Knock-in  | Inactive                                                       | P67 | Male | 67.47                                 |
|            | E1547               | Knock-in  | Inactive                                                       | P67 | Male | 65.25                                 |
|            | E1737               | Wild-type | N/A                                                            | P56 | Male | 68.50                                 |
|            | E1739               | Knock-in  | Inactive                                                       | P56 | Male | 70.25                                 |
|            | E1740               | Knock-in  | Inactive                                                       | P56 | Male | 81.07                                 |

Ages are given in days after birth. Measurements of cell densities for each sample are the means from multiple measured sections (see **Methods**). For a plot in **Figures 6b** measurements for knock-in animals were normalized by wild-type littermates. Raw measurements are plotted in **Extended Data Fig. 10**.

**Table S5:** Primers used to amplify enhancers to make transgenic enhancer-reporter mice (provided separately).

**Table S6:** Primers used to generate and characterize hs122 and hs121 enhancer knock-in mice (provided separately).

**Table S7.** Knock-in founder mice generated for this study.

| Enhancer | Founders |                                                  | Description                                                                                                                                                                                                                                                                                            |
|----------|----------|--------------------------------------------------|--------------------------------------------------------------------------------------------------------------------------------------------------------------------------------------------------------------------------------------------------------------------------------------------------------|
| hs122    | E1239    | Female, Heterozygous/ Mosaic for knock-in allele | Knock-in of enhancer allele with 5% of base pairs mutated in place of the reference hs122 allele. This mutant enhancer allele showed no activity in the transgenic assays. Allele generated by homology driven repair using a plasmid template with homologous arms.                                   |
| hs122    | E1245    | Male, Hemizygous for knock-in allele             |                                                                                                                                                                                                                                                                                                        |
| hs122    | E1254    | Male, Hemizygous/ Mosaic for knock-in allele     |                                                                                                                                                                                                                                                                                                        |
| hs122    | E1257    | Female, Homozygous for knock-in allele           |                                                                                                                                                                                                                                                                                                        |
| hs122    | E1263    | Male, Hemizygous for knock-in allele             |                                                                                                                                                                                                                                                                                                        |
| hs121    | D5859    | Male, Hemizygous/Mosaic for knock-in allele      | Knock-in of enhancer allele with 5% of base pairs mutated in place of the reference hs121 allele. Activity of this mutant enhancer allele in the transgenic assay was similar to the reference hs121 allele. Allele generated by homology driven repair using a plasmid template with homologous arms. |
| hs121    | E1092    | Female, Heterozygous/ Mosaic for knock-in allele | Knock-in of enhancer allele with 5% of base pairs mutated in place of the reference hs121 allele. This mutant enhancer allele showed no activity in the transgenic assays. Allele generated by homology driven repair using a plasmid template with homologous arms.                                   |

5 All knock-ins were generated in the FVB mouse strain. All founders were screened by Sanger sequencing of overlapping PCR fragments starting outside of the homologous recombination template. All founders were also tested for the homologous recombination template plasmid backbone, and only founders with a single integration of homologous recombination template were used for line propagation.

The complete Sanger sequence of an F1 male mouse hemizygous for the hs122 enhancer allele with 5% of base pairs mutated:

10 TGGATTTTAAAAAATGTATACATTTCCCAATGTCTACATAAGTGATGTAATGACATTTGTCGAGTGGCAGATCTTAACTCGACAAATGTCATTACATCACTTATGTAGACATTGGGAAATGTATACATTTT  
TAAAAATCCAACAGTTCAGGTTTAGCGAGGAGACCCAAACAGATTTGGCATTTTTACTCCCTGGGCTCACCCCTCCTGCGCGGGAAACCGTAGCTCCCCCTTCTCCGGGACCTGCCGCGCCCTTCGG  
GTGACCGCTCGGTGGAAGCTCGCCCGGGGGCTGGGTCTCGCCAAATGCTCCAGGGTGATGGGAAAGGGAAGAGAAGCTTAATTAGTTTCAATTTGCAGCAATTAGCGCGCCGACCTTTGGGGAGAGGGGC  
AGGCGAGAAGGGGGCTGCGCGCGTACTATCACGGCTCCTGGAGTAGAGAACCGCCACCCGCCAAGACGCAAGCAACCGCGGGGGCGCGGGCGGTCTCCGGGGCCAGGCCGGTCCGCGCGCCCTTTG  
GCAGGAGGTGGGAGCTGGGTCTTTAACCGCCTTAGTGAAGTGCGGGCTCAGGCAGAGGTCAAGGGCCCCGCCACTGTAGGGCAGTCTGGAGGGGTCTGCTGAGCCCTCAGCACATCCAAGAGACCTT

GTGATCCTGAGCTCCTGTCTAAAATCCGGAAAGCTTGCCCAAGGGGGGGGGTCCAGCCAGCTGCTTTTTGAATTCGCTGTCTGTGGGTACCACCACCTTAGCCAGGTCTGGACTTGCCAGAGTG  
 GCTCTCCCAGGCAGAGTCCCAGTCTGGGGCATGGGAAGGGGCCACCAGCTACCATTCCCATCGCACACTCCTTTCTGGGGTTACTAAGGCCAGTTGGAACCTTTCTGGGGCATTTCTCTAGACTACACTCA  
 CAACCCCTFCAGCCTTGCACAGGCTTTCAAAGTGAAGCGGTTTTCCCTGGAGTGGAGGGCCGTGTGTGGATTGAAGAGTGAAGAGAAGCCCGAGGGGAGGATTTATTTATTTATTTGGTGCATATCACTTTT  
 CTGTGCATTTTTGGCTTTTTGTTTAGTAAGAAGGCTTCATTTCCCCCTCCAGGCTGCCAGTTGGATGGTATACGAGAAAACAGTACCATTCTCTGTAAATGAACCTTTTTTAAAGTAATTTTTCTCATTTG  
 5 ACCCTTCCATGGAGCAGAAGCAAATTCGCTGAAATTAACCTCCAAGGATACATTTATTACTGGCCAAATGAGAAGCCCTCGCCTGTTTTTACAAACTCTAATCTATGTCATTCTGATGCCGAAACAGCCCA  
 GGCTGGCTCCTATTCTTTCAACTTTCCAGCTGGAGGGACCTCATTTGCACTTAATATTTCCCAATAAATATCACAGCTAAAGACCCCTGACTTCCAGCAAGTCCACATTAACATGTGACATGTCACG  
 CATGACAACTCTGAGTATCTTTCAAAGCAGCATTTAAAGCAAAGAAACCAATTTCTCTCTTCCAAACCTCCCAAGTGTGAATGACGGGGATGGAAGAGCCACTGGAGGCTACTTAGGGGATTTT  
 ATGAGATTTCCAGAATGATTTAATCTATTGTGAGCATTAATGAATGGCAACCAATTTGGCCCAATATCTGGGAACCCAGTCAATACTGGGAGCGGCTAACAGGCCCCACCCACCCCTCAAC  
 GTGAAACAAACCTCTTCCACCCTCAGGAGGAGCTGTCTGGAGGCCAGGGAGCTCAGGAGAGTCAAATTCAGGGCAGAACAAGTCTCCATTCGCATTCAAAGTTGAAACAGCCCGGACACCTGTTTTCTCAA  
 10 TCCACTGAGGAGTGTAGGGAGCCAGGATGGCTCCTGGGGGAAAGTTGGAGGGGAAGGGTACATTGATTTGTTACATTTTTTTCAGACAGGTTAGCCAGCTCAGGAGGAGCCCGAGCAAGAAAGGAGTACTTG  
 GCATACCATTAGAAATGGAGAGCCACCCGTGGTCTGGACTATAGGCAGCAGCTAGGCCACAGACAATTAACCATGTGGCGACGACGGTGGCAAGAGGATGAATTTGGGAGAGTGGTTGTGGGACAGAATCT  
 CAAAATTAGGTGAAGTTCTGGTATTGGCCCCATCAGTTCCTCCCAACATACGCTACTCGGTGGGCAAGTAAATTTGCTAGTGTAGTTTTTCAATTTTTAGCACCAAAGGCTACTTTTGCATGGT  
 TTGGAATGCAAAATCTTAGAATGAAAAGGGGGCTGAGATATTAGAGGGGAGGAAAGCATAGACTAGCTAACCTAATCTGCTTAGAAAAGAAAATGTGTATATGCACATATGTGTGTGTGTGCTATAC  
 ACAAAGTGAAGTGAAGTCAATGAAGGAGGCTTAAATGGAGCCTAAAATGGTATTTTTGGAACAGAGTTCAGGAGCAACTGCATATTTAAATGACAGTGGTAGCTTGGCTGGGAGGGGGCGGGGAGAAGAA  
 15 AAGCCCACTACTGAAGAGGAAAGAGCATTTGTTCAAAGAAAAGTTCATGTTGTCCTGGACGTTAATAACAGTCCAGTTTGAAGTATACATTTTTTTTTCTTTTAAAGAAAAGGGGGCGATTACAGTTAT  
 ACATTAAGAAATGTCATTAGTCAATTTTATTCATTTCCGGAAATCTTCGTAAGCCCTGAATCATACTTTGACAGCAACTTTGTTAAATCCAGGGGTTATTACTCTGGGCCCTTATTAGGTTCTACAC  
 CACATCCAAAGAACTCTATAACCTCTCACAAGAAAGTTTACCTCCCTTATAAAAACAGTAATGATACTTACTGTGCAATAATTTAGTGTATAGTTGAATCAACTAACAGTTCATTTTTATCTCTGCACAA  
 AAGTCTAGTCTGCTTATAGAAAGCTTGTGCCCTCTTTGGTGTGTTAAAGTGGTGAAGAGTGAATGAAGGCTGGTTGCATTTCTCTTTTGGCTCGCCTAATTAACATCTCTTTTGTCTCTCAAT  
 TGGCACAGTGTATTAAGCGGTTTATCATCTCATAGTACAGTATTGAGAGAAAACATCGCGAGCACTTGGCCCTAGAACCTGCGCTCCTTTGACACCCCTCAGGTAATTAACATTTCCACTGCATTATGAATACTAG  
 20 AGGAAGAATGGAGCGCAATGCCCCATCAAAGAATGCCTGTCTGTCTTTGCTCAACAACACCATTCGTATCAAAAAAAGCAATAAAGCTTGGCATAACAAAACGAAACATAACATTAGCCTTATAGT  
 TAAATTACCGCAGAGCCGCTGCTATTCAAACAAGGTTTGAACAAGCCTCAACAACCTGATAATGCTGCCTTCGGGATGAAGGAATTTAATCTGAAATTTGAGGCTGGCTCAGATGAGTAAATCTATTTAA  
 ACTGCTATAAGGAAGCTTGGCCAAACTGTTCAATTAAGAAATATTTAGGTGAGGAGAAAGAGGAGAGGACAGAGGTGGGAGGAGAGGGAGAGGGGAGGGGAGGAGAGAAAGAGGTAGATGGAT  
 TTAAGTTTTGACCGGAACATTTAGTAGCATTTGAAGTGAAGGTTCCAGGTTCTGAAAAGAGATGCTCTTTGATGCTCTTCTAAAACCTGAAACAGATTGCAATCTGTTTTTAGAGTTTCTTGTCTTTGCA  
 TCCTCTGCAAACTCCTATTAATGGTATGTTTGGAAAGTAACTTAGGGTGTCTATTGATGGCAAGAGCTGGAGACGTGGAGTAGTGTAAATGGCAACCGACTCACCTTTCTGATCCTGAACCCCAATCTATA  
 25 AACTTCAATCAGCCTCCTCCCTCCCTGAAACTATCATGGATTGACTTTATCCATATTTTATTTGACAAATTAGAATATTTTGGAGCATTCCTGTGGATTTTCAACTTCCGGCCTTCCCTATAACCTTTGTA  
 TTAAGGACAGTTGAGAGCTGGCAAGCTAGGTTCAAGGGAAGTTTCTGAAAGGATCTGCAGCAGCAGCAGGTTCAACCTAGTTCATAAGTGCATGAGGCCCTGAGCAGAGTAAGACCCTTTGTGGTACCATTTCT  
 CAAATAATTCAGTAGGTTTAAACCCAGAGGTTTAGCAATCTCAAAAACAAATAAAAAAATAAACAACCAATTTGCCAGTGTGTTGGTGGTTTACACCTTTAATCCAGCCCTTGGGAGGTAGACACAGGTTG  
 AATCTGAGTTTGGAGCCAGCTGGTCTACAAGGTGAGTTCCAGAACTGTGTACAGAGAAATATGTTCAAAAACAAACAAATAAATAAATTTGCATATGGCAAGCAATTAATTAATTTGGATTTCTGT  
 GCTTCTTGGAACTAGATGGCAAGGTTCCACCCTGGGCTTGTCTCTCAGCATTACTACCCTCCTGTAGACTGTCCCTGAAGTTCCTTAAGTGTGTACAGTTCACTCCATTCTCAGCATTTGAGCTCCA  
 30 GGCTGGTGTGAGGGAGCCTTTGGAGACAGGGATGGGCGGCATTTCTGAAAGCAGTTCTACAAGTGTGCCATCAATCACAGCATGTCAAGGAATAGAGAACCCCTTGAAAGTGAAGTGGGCAATATGCTGACC  
 TTTCAACAGTATCCACTGGAATTTCTCAAGTTGCAGGTTCAAATTTGCATACATTTCTGCAACCTTTCAGGACCCCGAGTTAAAAAGCCTAGACTAGGTAAGAGATCCTAGTAAGAAAATGCTAACTACTG  
 CCATTGCTATGCTCTGCAAGTATACCTCAAATAGGTTTTTCTTTTTATTTACATTTAGTTTTGTTTTTAGAGAAAAGGTTTCTCGGTGTTCTCAAATTTCTATGTAGACTAAGCTGGACTTAAATTTATGGC  
 AACTCTCTGGCCACATCTAGAGTGTGGGTTTATATGTATGTACCCTACTACTTGGCAAAAATGTCTGATTTTCTATAGTGCTTATATAGAAATAGTCTTGTCTTAGAACAAAGTATAGTATGAAGAAA  
 GGCAAGAAATAAACTAAAGTTGAGTCTTTCACTTTTTTGGGGGGTGGGGAGACCAAGTTAAGGATAATTTTATTTATATTTGAACATAATCACAGCTCCAGAAATGAAGGGAAATCTACTTCTCTCAGAA  
 35 AGCCCAATGAAACAGCCATGACATTAATCTGTAAGAGCAACCCAGAGCTGATGAGGAGTGTGCGAGCTACCAATCCCTTTGTTTTCTCAAAGCCTTGTCTGCTTAACCTGTGACCGGCTACAGCAGCT  
 TTTAGCGCAATTAACCTGTCAGGCCCCAAACCCAGTGTTTCTAATTAATAATTTGAGTGTAAAGAGAAAGAGGAGCAGCTTAAGAGCCTGAAGAGGAGACGAGGGAGAGAAAAGAAATGGCAAAGCTAGACAAA  
 GAAGACTTCATCGGTTTTAACAAGTATTTCTTACATCCAGGCTTGCAGGTTGTTCTTTCTTATCTGGGATAGCTCTCTCTGGGAGTCAGGAGCTGTCTATCGCTTTAGTGTCCCTTCTCTCTCTCTC  
 TCTCTCTTCTGGATAAAAAACTACCACCCCTAGTCTTCTTTATGCTTAATAGATCAAAGGACTCAAAATTCACAGGACTTCTCAGTACTTTCAATATCCAGACATCTTGTCAACATCTTCCGACTGGGTTCT  
 GACTCGGAGGTTATGAAGGGATGCCAGCTGAGGTTTGGGAAGGGAAATGAATGGTCTTCTTCAATCAAGCTTTCATCCCTTTCCGCTCACTTACTGTACCCAAATTTAGAAAACAAAACAAAACAAAAC  
 40 CAGTAACTGGTTTTCTTTAGGAAACTTTATTTCTTAGGTACAGATCACAATACATTTTCTTTTATAAAAAGACAAATAGATAAGTATTTAAGGCTGCCATATTTGTAATATTTGTTTACTTCAAAG

The complete Sanger sequence of an F2 male mouse hemizygous for the hs121 enhancer allele with 5% of base pairs mutated that was active in the transgenic reporter assays:

TGTTTCTGGCAGTTAGAGATGCAGATAAAAGCTCCCACTTGCTTCCCAATGAGAGCTTAATCAATAGCTTATGGAAGGTTCTTAGGAAACAGAAGTGGATAAGCTGTACAGGCCACATCATAGGGGCTGG  
 45 GAGGGCAAGAAGTCAATTTGTTACGTTTTCTCTTCCGTTTTTTGGGTACCAGGCCATCCATGTTAGGCTTTACATAAAGTGTACCTGGTTTTCTGTCAATATCTACCCACTGCTTTAGAACTTAAAAGAAA  
 TAGCAGAGGGTAAAGGCTGACAGCCAGTTAGCATGCTAGCTGCTTCTTTTGCCTGCTTGAATGACACTATAAAGACCGCATCCCGAGTGTAGCTATGATCAGGACTCAGGACCAACT



GGTAAATATTTTAAAGAGCAGTTGACGAGGCACACATAGCAGTGGCATCCTGCCACCAGATACCTCTAATTGTGGCTCTTGCTCCACAAATCCAAACTTCTTAAAGACAGAGAAGGAAATGTTCTTTCT  
 ATGTGGAAACATACCAGGAAAATGCCATCTCATGATCTAAAGTAGTACTTGGAAAGACTCATCTTACCTTAGTACAAGCACAACAACCTCTTTTTCTTAGTTTTCTTGCCAATACTCTTGGAGCAACATGTAGTCA  
 GTGCTTATTTCCFACATCGAGAGATTGCTCAGTCATACAGTAACTGTCAAAGCATTCTCATCTAACCCCTAAGAAAACAATAGCAAAAAGTTAGCCTGGGTAATAATCTCTAAATATTTTATCAGACAAA  
 CAATGCATTGCTAATATAAACTTTATTTACTACTGGAATACAACTTACCCAAGTTACAACACTTTTGTATGCAAGACAACTAGTTCATCTGAGGGCTGACCTGCCTTAGAGGTTTTGTTTAAAGTCATC  
 5 TGATTAATGAAAGACTTACAATGTGAAAAAAAATCAAACAAAAGAAACAGGAGAGCTCTCTAAGAAAACCTATTACTAGTGTACATTTGCCAGTCCAGTGCAGTACAGTAAAAGACAGATCTCTCTCAG  
 CCTGCCTCTTCATAAAACCATTTTTGGTCTTAAACACATTGAACTAGGCAAAGACATTTTCAAACACTGCCTACTGGTATTTTTATTTTAAATTAAGGCAAGCTTAGGCACACAGGCAGCAGCCGTCTCTGTTCT  
 GAATGTCGTTTTCAATTTATTTCTGTGCAAGGTATCAAACAACAGTCAAGTTAATTAATGATTCTGTGAGGTGTATATAGTCAGTCATAAATGTTCTCTGTGTAGAGGTGTGCAATTTACTATATCTGAATTA  
 TATTCTGTCAATTAAGATCAGGTAATAATTTCACTGAGTTTTTAAATGCAATGACTTCCACCATAACGGTCTCCACCTTTCTTAATCCATAGCCTCCCTCCCTCAATGTGAGCATATTTTGCC  
 TTCAGGTGTGGAATTTAGGAGACTTTGAGTACTTTGAGAAAATGCATCTCTTGGTCTCTGCAATTTAAGGCCATGGAAGAGTCCAGAGAGCTGTGGGCCCTCTATCTAGCCTGCCTTTCTCCTAT  
 10 CAATCCACAGTAGAGTCCATGACAAAGTATAGTTGTCCGAAAGATCTCAAATGATACCCGATTTTCAAAGAGAAAAACATTTAGAGCCCTAAGCAATCTTAAACAGAAGCAAGAAATAAAAATATAAATCGTT  
 GAGTCAATTTCTGTCTGGAGAAAAGAGTAGAAGGCACAGTACCAGGCACACAGCATGCAAAAACATTTATCCCGCCAGGCAATGCCTGGAGGGCCATTTTTGTCTGAGAAATCACTTCTAGATACTAAAAAT  
 TTCTGAAGGCTGAAGATCTCTCTGTAGTCCATTATTTCCACTCTTATAAACAATTTATCTCAGTTTTCTTTTTCCCTTTTCTGTGTATACAAAATACAGCTTCAAACAGTATAAATCTATCT  
 GTGGTTTCAGTCAAGTGTCTACGAGACTCTGACAGATTTTACAAGTGTGATTATAAATCTCTCCACCATTGGTCTGGTTCATGTTCAATAAAATACAGCTTTCTGCAGCCTGGTGGTGAACCTGTGA  
 CCCTTTCTACTTGAAGCAATGGAGGTGCAATGGGGCCACCACCAGGAGCTGTGGCCAGTGGAAAGTTGGAAAAGAGCAGAGGGTGACTTGGAGGGGAGGAGACAGGGCGAGGCGATGTAAGAATGCCA  
 15 TGCTATGGAGAAAAATAGAAAGTGAGAGTCTGCCCTTACCATGTTTCACTGGAGAAAAGAGTCACTTGAAGAGATCAAAAATTTCTCTTCAACTGGATGAAGTGATTCTATCAGGGTTGGGTTTTGGGT  
 GTTTGTAATTTGTCATGCGGAAGAAAATGGCCATGCAGCCCTTGGTGGAGTTATAAAGTACTGTCAACCATACTGGACAGAAATTTTTTTTTTGGAAAGGGGGTGGGAGAAAGGAAACACATTTGTG  
 CAGGATCATTAAGCACTGTTGTATAAAATAAAGTTAGAAGATCAAACGAAAGAGGGGACTCGGGTAAATGCTAGAAGACAAGCTTAAATAAAGTTCTAAGAAAAAGCAAGGCAGCTGTAATTTCAAAGAATCT  
 ATTAATTTAGACAATTTACTTCAAAAAATAAATCAGAATGGTAAATGATTACCCAAAAGCAATCATGTCATCATCACTGAGAGATGGAATAAATAAATTTTTGTGACGTGGCTGAATGAGAGCAACTTAAAA  
 GCCACGGAGCCTGTCAGAAGCACATTTTCTCTCTGCACCCCGTTTCCCAATTCATCTCAGTGTCTGACTAACCTCGGCTCCCATGCATTAGAGCATTAAAAATAAATAGCATTTCCTACAAAACCGGCTC  
 20 CAACTGCCCATGGCAGACGCTTCCAATTCGCGCCAGCCACTGGATCAGCTTCCAGCGGTATCTAACAGGTGTAATAACAATAACCCGCATGTAATTAAGTGCGCATGATGCGTTAATGGAGATAATTCATT  
 CCATTTTGGGCTTATGAATATTTCTAGTAGATGTTATCAGGCAGCTGGAATAGCTGTTAATTTAATCATCATTCAGACCAGCAAAAATGTTCTTTGCGCCCGCATAAATTCAGAGAAATGAATAATGATTGACAA  
 TTGTGCTAGTGGATTTCAAACAGTCTCTGTGCGCTCTCAGAGCAGGAAGGGGGGAGAATGGAATACTCAAAGCACTTTATCTGTGAAAGAGAAAGCCATCCTGTAAATTTGAACATTTATCAGGACACAGATAAAG  
 ACAATTTTAAATTTATCAATGCAACACAATTACATTACAGTGCCTTAGTAATCATTTGGGGACCACTTTAAAAAGGGAAATAAATACTCTTCAATGGGAAAGGACAAAAAGAAATAGCAAAACCATTTAGAATC  
 25 CATTGATATTGGATTTAATTTTTTGGCATTATATTTTATTATAGGAAATATCAAACGTGTTTTGAAATGCTGGCACATTTAATCTGTTACCTGCAATCAGGTACACAGATTTGATTTTTACAGCTATCTCTG  
 TATTACAGCATGTTCTATGAATTACAATGACTTTATTGCAATTTCTTTAAAAACTCCCTAATGTTTTAAAAAGAGCCATCAATGTGGCATAACAAGTACTGTATGTACACCATTAACATCAGGACTCGGCTC  
 TCGTTACATTTCAACAACCTAGCTTTTCCCTAATGTTCTATACTGTATGTCGATGGAAAAAGTAGCAACAAAATATTTGATCTTCAATGAGCCATCTCTGTCTGAAACTCAGTTGATTATGATCAACTCTAC  
 CAAAGGCCTAGAGTCTCAGTTACTGTCCCAACAGAAAATGTTTGTCTACTCACCCAGCACTGTGATGTTAATTTGCCAAATCCTACAGGTATTTGCTGTACAACTTGAATTTAAACAAGCCAAATGGG  
 30 TAGACAGCAACTGCAGTCAAACCTGATGTGAGCACCACGTTTTTAAAAATATACACATAGTCATAAAGAAAATATCTTAGTGTCTCAGCTGGTGTCTTAGGACAGACAAGAGCAGAAGGTTAGCTGAGATCAGTGG  
 TGCTCAAAGAAGGCTAAGGATTTGGGACTGGGAAAGAGTCAATTAGACTCTCTGGGAAAGTTGGATGACATGTCGTCTAGTTCAGTACCACATCCCAATCCCATTTCCAGAGTCTTATCATTTCCCAATAA  
 GAGCCTAGACTACAACATATTTGGTAATGTCTGATTTTTAATTTATCTAACATCTTTATACTATCAAAGTAAACATGTTTTACCATCACCATTTCTTCTGAAGACCCACTTTTCCAAGTCTTTGGCCAGCAACATGAT  
 CTAAGAAGTGTATATAACATCTTCAATGTTTCAATATACATTTCTACTGTTGATTCATACATTTGGCTTAATGTTTATTTACATGGTTTTTAATCCTGGGTGCATACATTAAGAGAAATATACGTTTTGGTGACA  
 GCAATAACAACAAGATTTGGAATTCATATACATTTGGAGAGATTGCAGGGTGGGGTGGGTCATGAGGCTAGGCCACTCTTGGAAAGAAAAGGCAACCAAGTAGAACAGAGAGAAAAATCTTATGTAATAAAT  
 35 GTATCACAATGATTAGGGTTGGTTCATAATCAAATTTGAGAGGAATTTCTGAGCTCTTATTTCTGAACATCAAGCCTCTGTTTATCTTCTTCACTTAAATGAATGTATAGATTGAAAGACTAGAGCACTTTGG  
 TAGTATTTTGGAGCCCTGTTAATGTTTGACAAAATGTTAAACCAATGACAATGAATAAATAATAGATAGGCAGTAAAAGCTATGGACCCAAATGCAATAATTTATTTATCAGAGTGGGAGGAAAAAGCCTCCAGAG  
 TGTAGCAACTATGTGAAAAGGACACCAAGGGAATGGCTTTTACATTTCCCTGGACCTTGGCAATTTGCCTCTTAGGGACAGGGGCTAAGAGACAAGACTGGCCTTCTTTGTACCCATCCCTGGATCTCTT  
 TATTTTTCTATTGGGCTTCTGTTCTCAGAGCACATTTCCAGTGACTTTGGAAACAGTTGTGACCAATGTAATAAGATGGAACACAGGTGGACTATAGTTACCTGTAAGGTAATAACAGGAACAGATCTTGGTGA  
 AAGCCTTACCTGTTCCAATATAGACCATAGATATCCCTGGAAGAGGGTGTTCGAAGTCACTCCCTACACCTACTCTTTCTCTCTACTTTGGAAGCAGATGCAGCTTCAACTATTTCCAGGGGCTCTCAG  
 TTTTTCTTGGGGTCTATTTGTTTCTGTTGTTGGTACACAATCCCTTCAAGTTAGATATCATGCACATAAGAGATGCTATACCCAAAACAATGAGCTTTGTGTCAGAAAAAAAATCCCGTTTTTATTAATTTAAA  
 40 CCAACAGTAAATTTGGTAAAAATAAATAAGAAAGGAAAGTAGAAAATGTCACAGCAGACATTTAAATGACTGCTTATCATCAAACCCATTTATTTCAAGGGGAAACTCAAAGGTAATAAATCTGTACAGATACATTT  
 ATTTTGGCTACACTGACTTTAATGTCTATGTAAAATAAATAAGGTTCTGTGATCTGACTCATCAGATACAATGTAATAATTAAGAGCTGGGTGACTGTGGTGCCTGTAACCTCAGAAAATACACAACAAGATCTCT  
 GCCCAATAAAAACAACAAGTAACCAACTAAACA

The complete Sanger sequence of an F1 male mouse hemizygous for the hs121 enhancer allele with 5% of base pairs mutated that was inactive in the transgenic reporter assays:

45 AGATGCAGATAAAAGCTCCCACTTGCTTCCCAATGAGAGCTTAATCAATAGCTTATGGAAGTCTTCTAGGAAACAGAACTGGATAAGCTGTACAGGCCACATCATAGGGCTGGGAGGGCAAGAAGTCATTT  
 TGTTCAAGTTTTCTCTTCCGTTTTTTGGGTACCAGGCATCCATGTTAGGCTTTACACTAAACTGTTAACCCTGGTTTTCTGTCAATATTTACCCACTGCTTTAGAACCTAAAAGAAAAATAGCAGAGGGTAAAGGC



# Supplementary Figure 1 | Images and scoring results of all transgenic embryos.

Locus: *hs110 - uc206*

Examples shown for calibration

Images used as guidelines to score the strength of enhancer activity in the forebrain

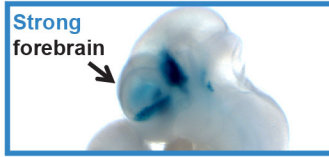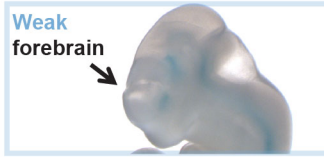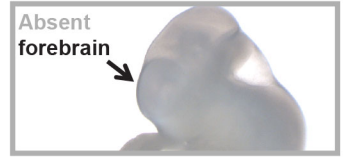

Reference allele

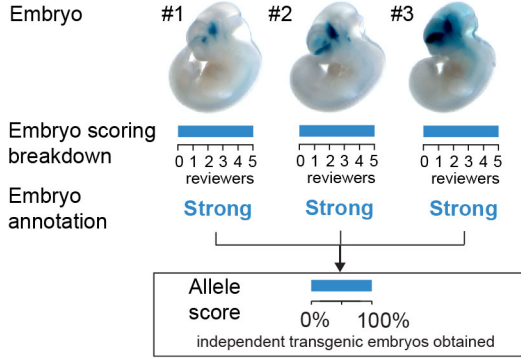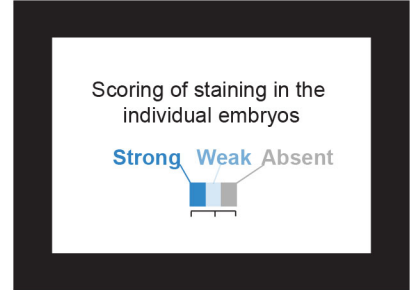

2% of bp mutated allele

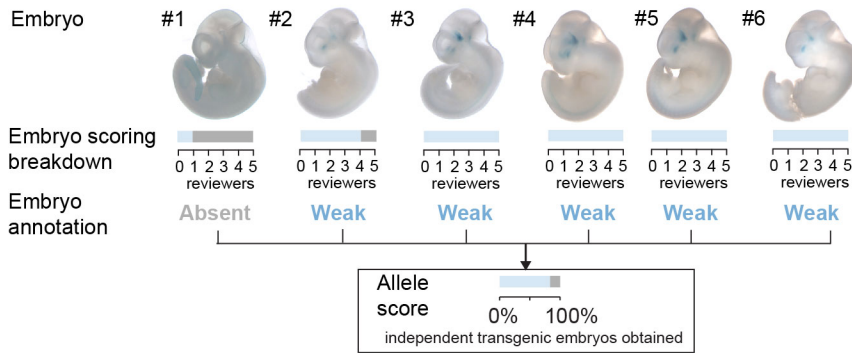

5% of bp mutated allele #1

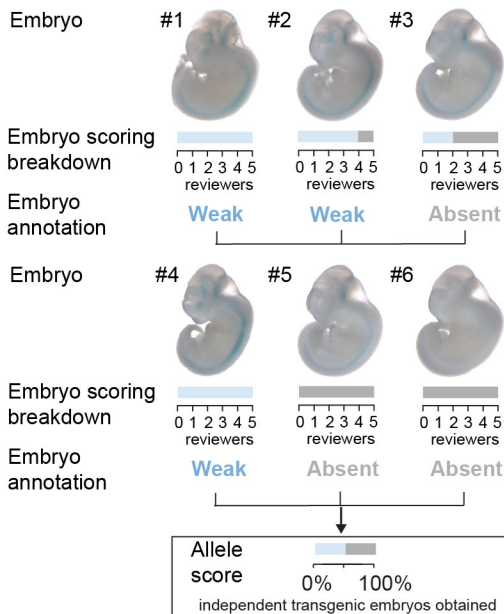

5% of bp mutated allele #2

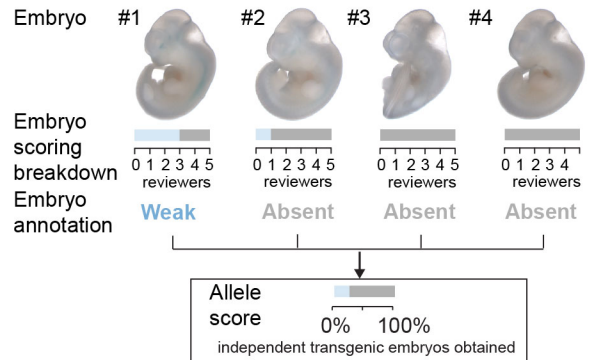

Examples shown for calibration

Images used as guidelines to score the strength of enhancer activity in the forebrain

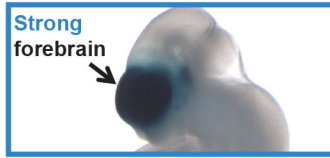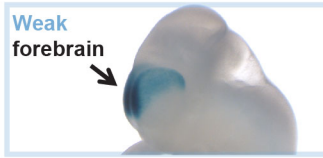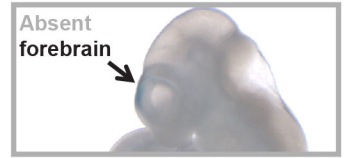

Reference allele

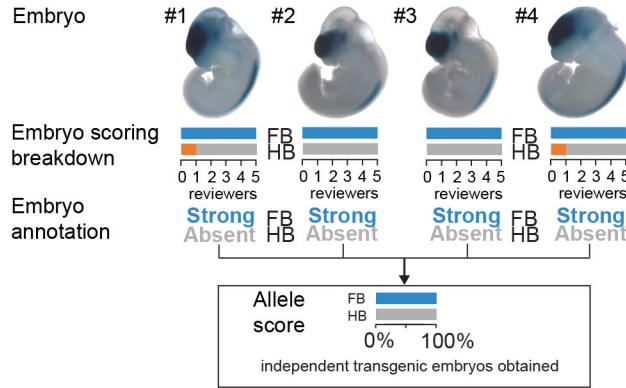

Images used as guidelines to score the gain of enhancer activity in the hindbrain

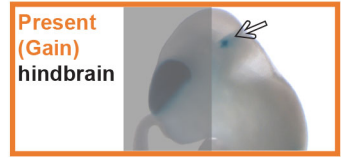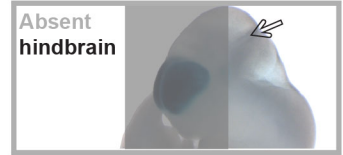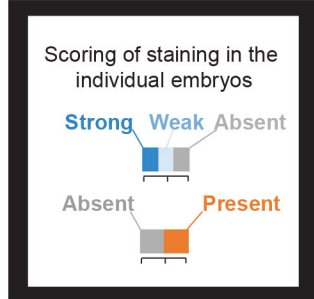

5% of bp mutated allele #1

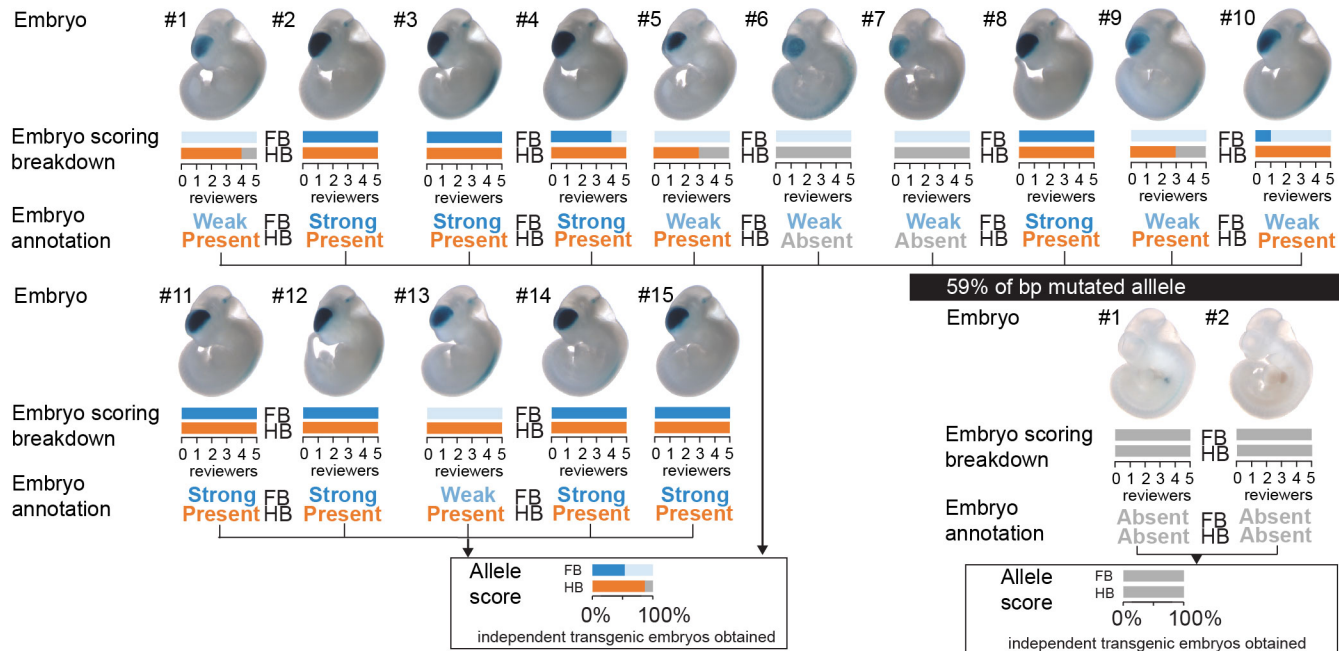

5% of bp mutated allele #2

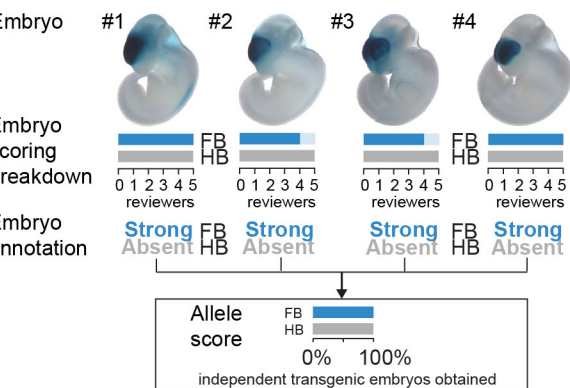

20% of bp mutated allele

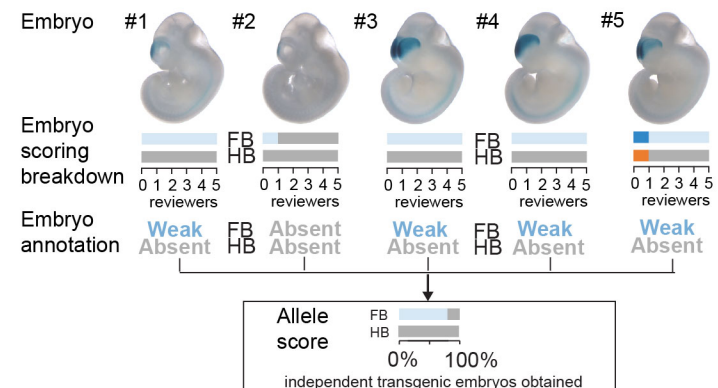

Examples shown for calibration

Images used as guidelines to score the strength of enhancer activity in the forebrain

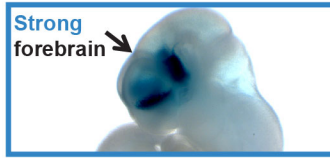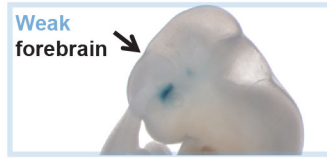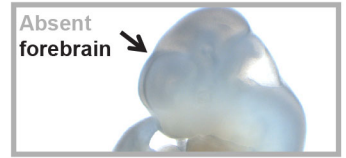

Reference allele

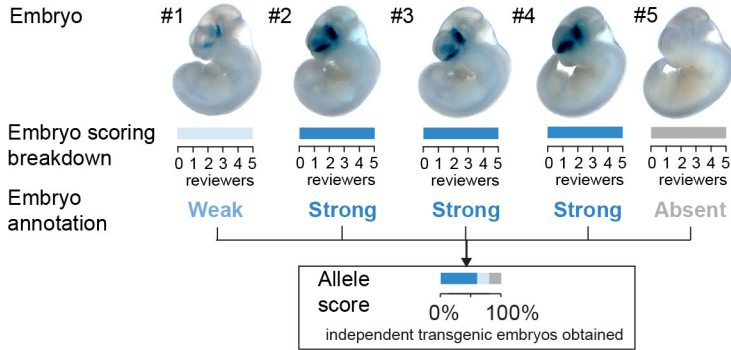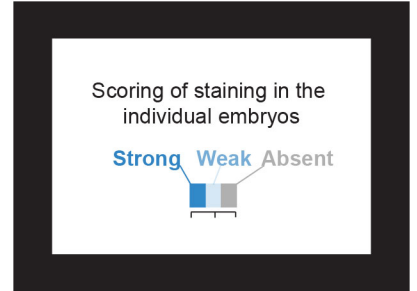

2% of bp mutated allele

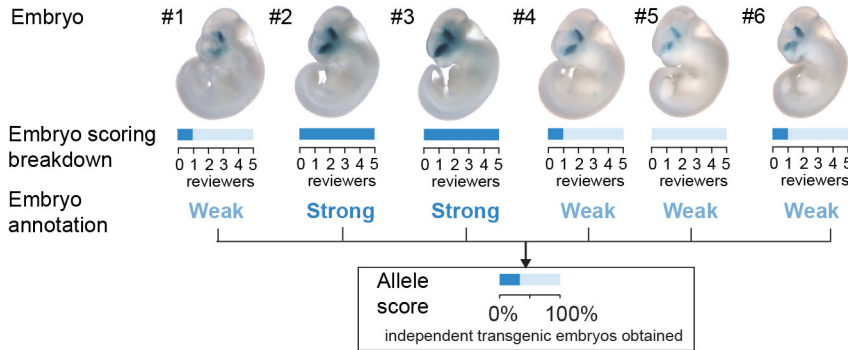

5% of bp mutated allele #1

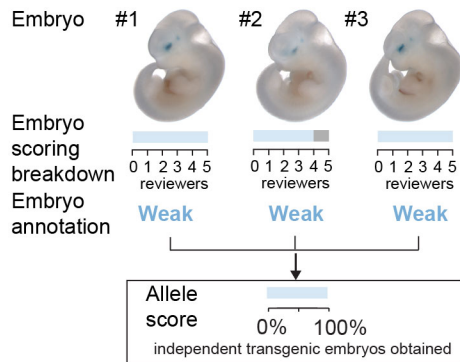

5% of bp mutated allele #2

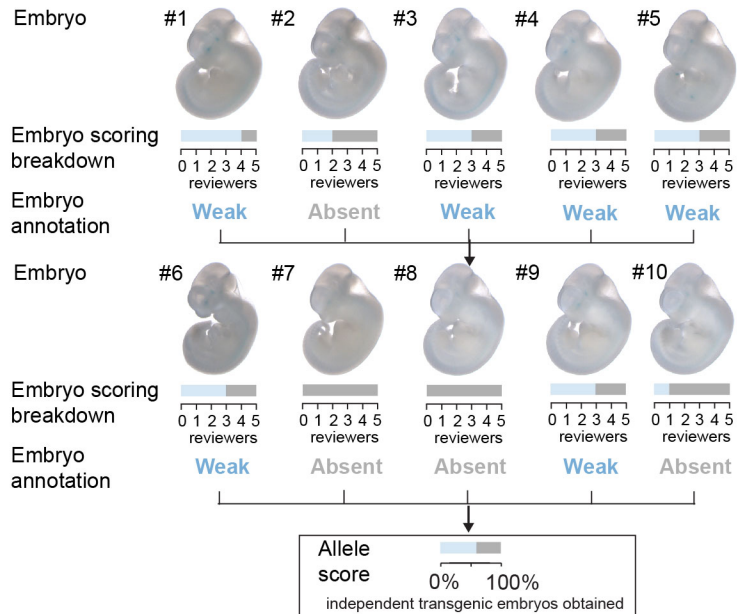



Examples shown for calibration

Images used as guidelines to score the strength of enhancer activity in the forebrain

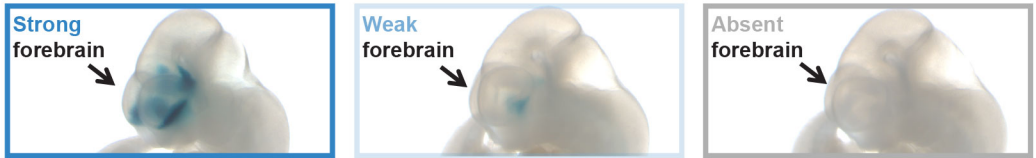

Reference allele

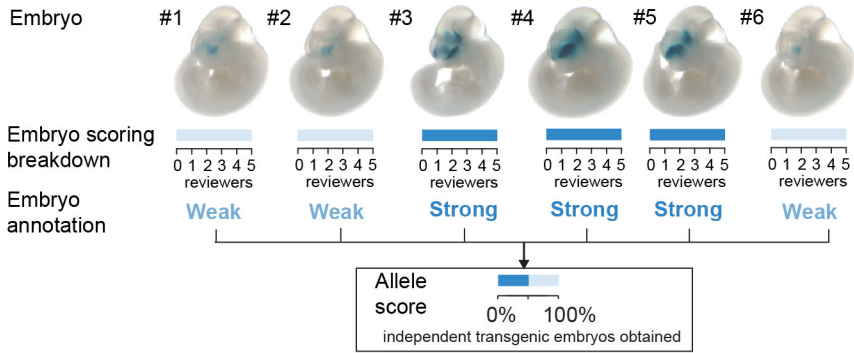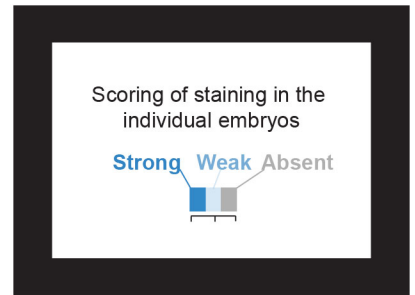

5% of bp mutated allele #1

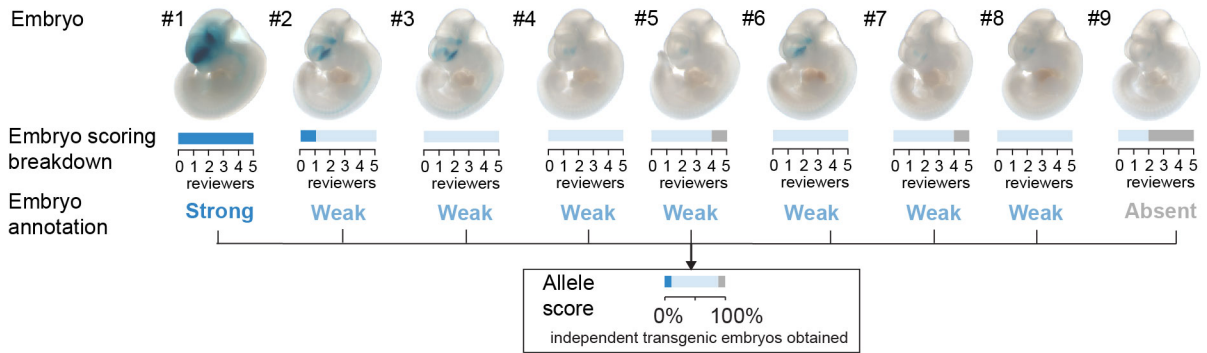

5% of bp mutated allele #2

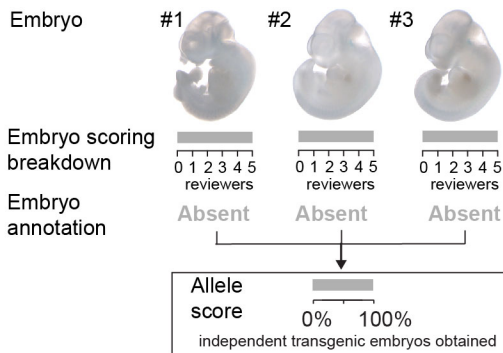

5% of bp mutated allele #3

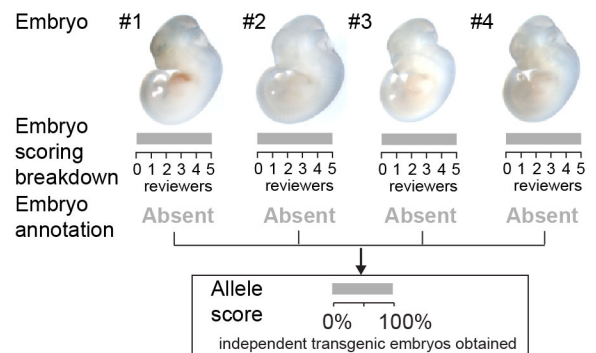

5% of bp mutated allele #4

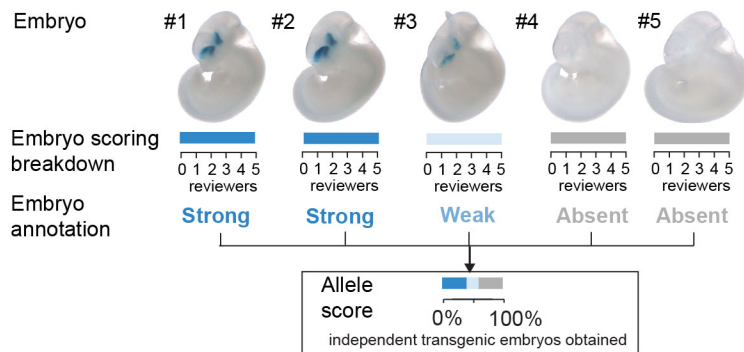

20% of bp mutated allele

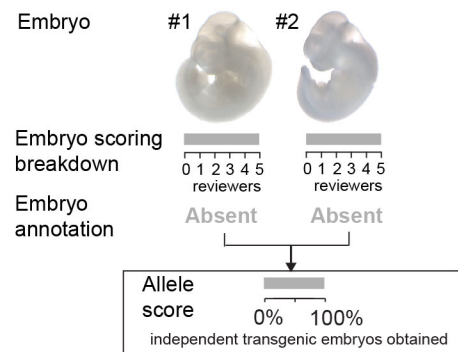

Examples shown for calibration

Images used as guidelines to score the strength of enhancer activity in the forebrain

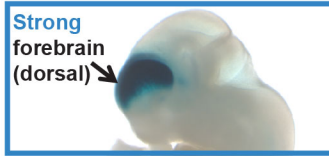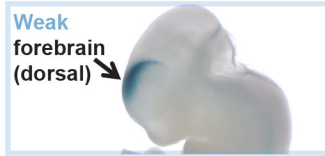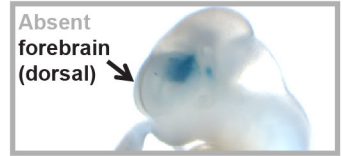

Reference allele

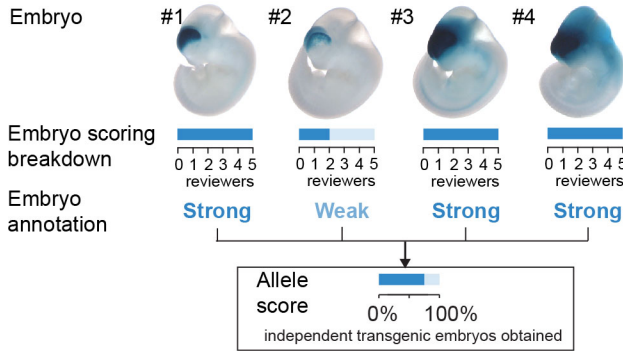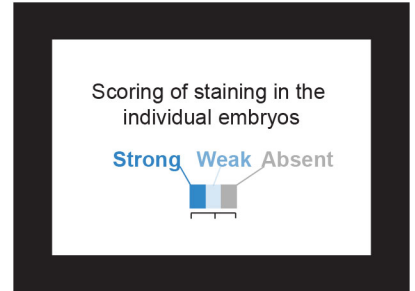

2% of bp mutated allele

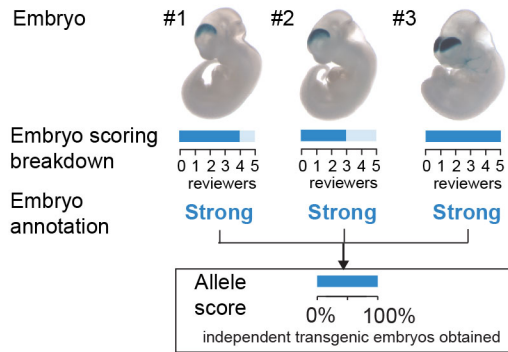

5% of bp mutated allele #1

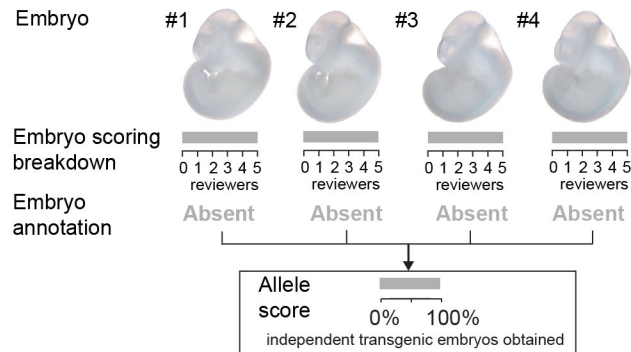

5% of bp mutated allele #2

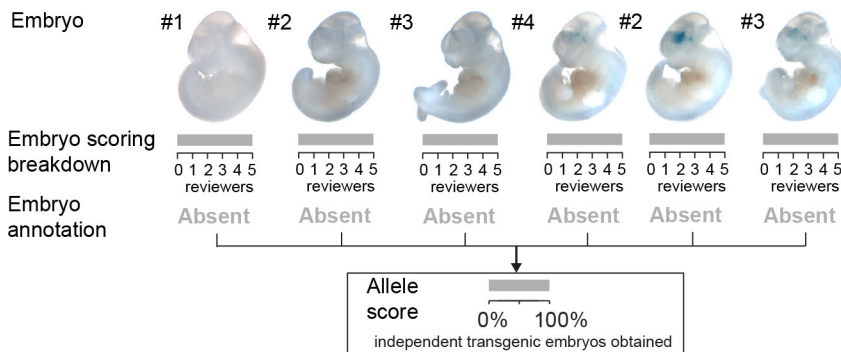

5% of bp mutated allele #3

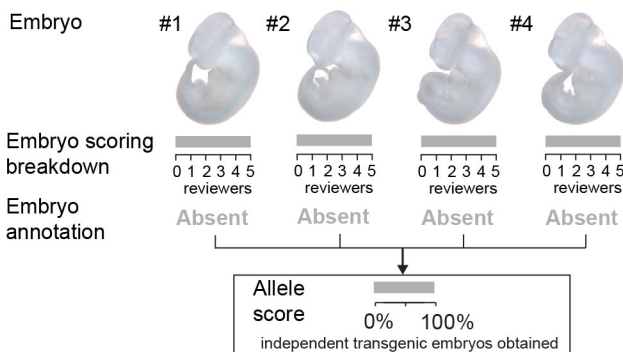

20% of bp mutated allele

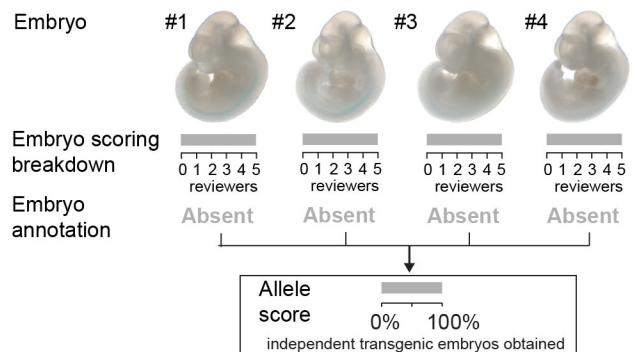

Examples shown for calibration

Images used as guidelines to score the strength of enhancer activity in the forebrain

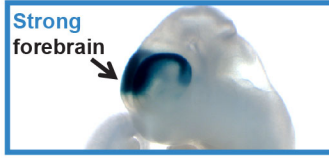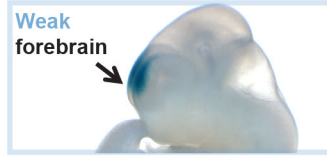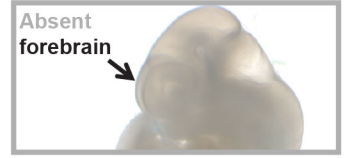

Reference allele

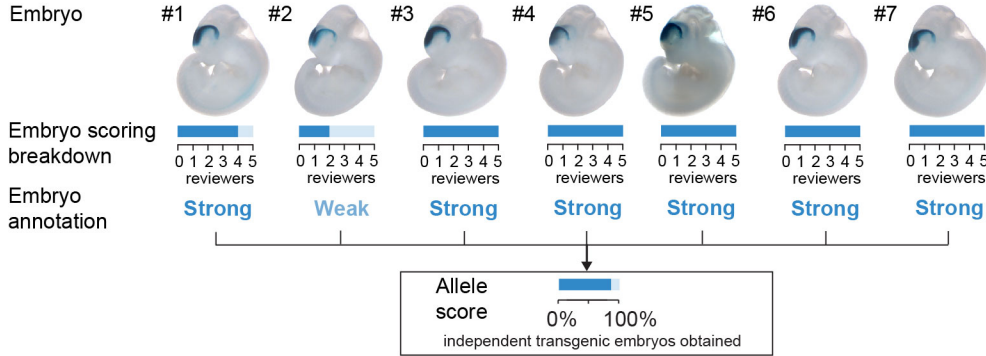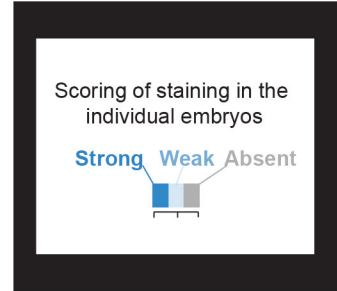

5% of bp mutated allele #1

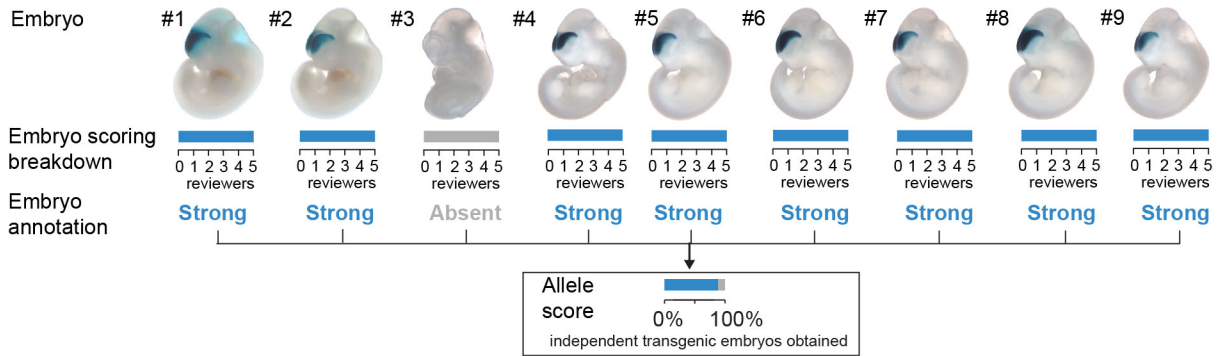

5% of bp mutated allele #2

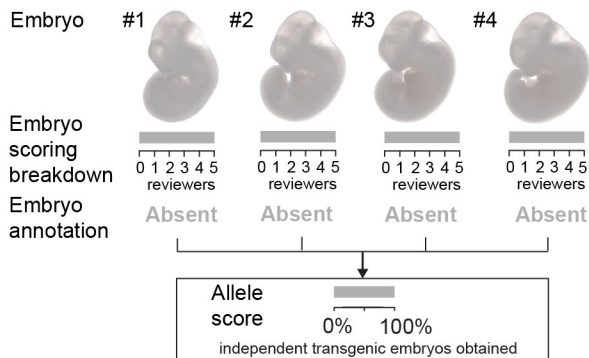

20% of bp mutated allele

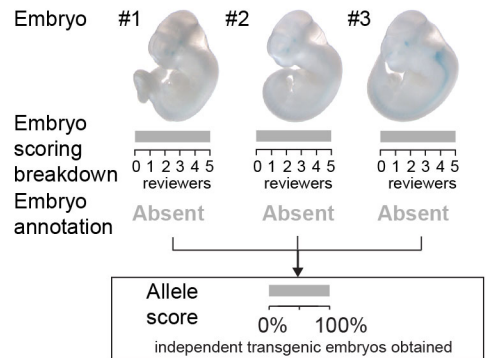



Examples shown for calibration

Images used as guidelines to score the strength of enhancer activity in the neural tube

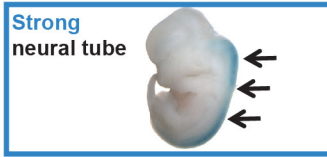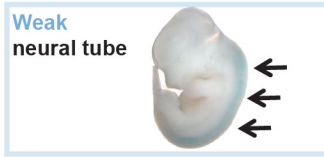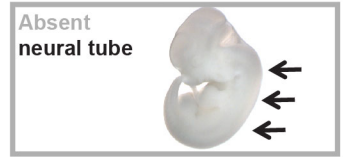

Reference allele

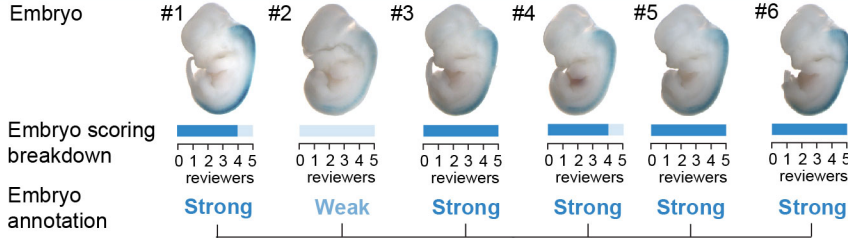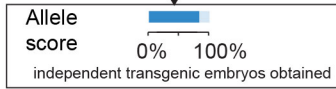

Scoring of staining in the individual embryos

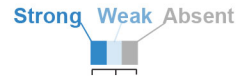

2% of bp mutated allele

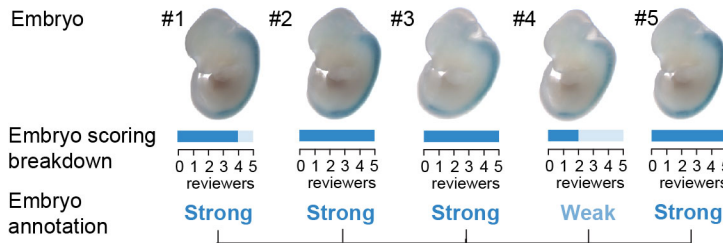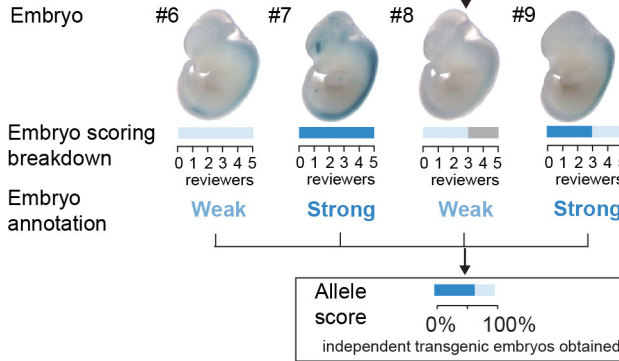

5% of bp mutated allele #2

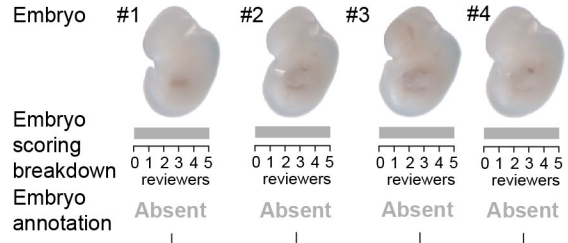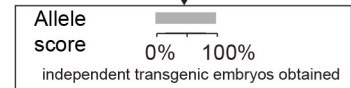

20% of bp mutated allele

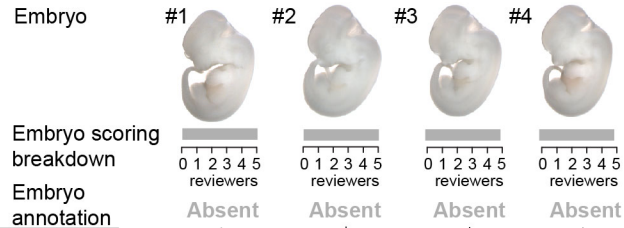

5% of bp mutated allele #1

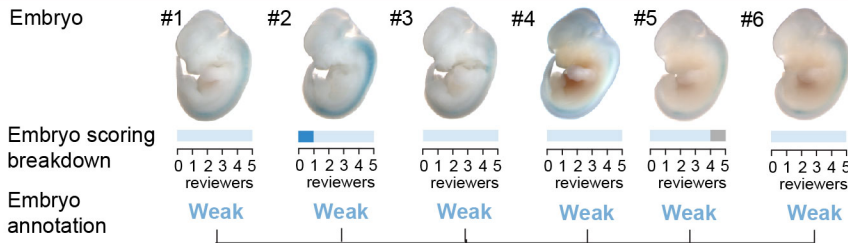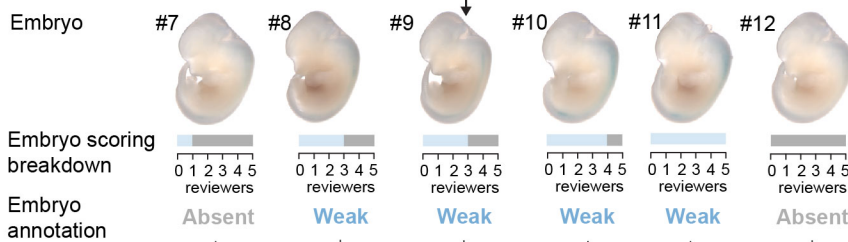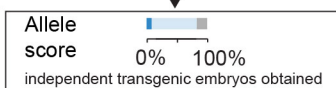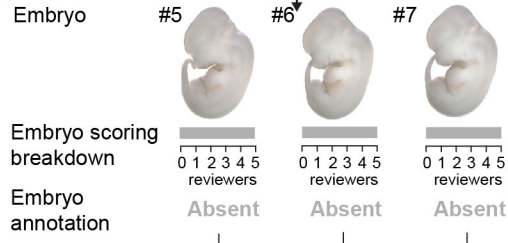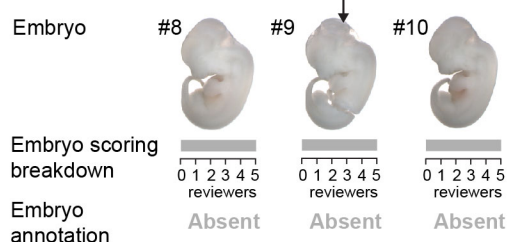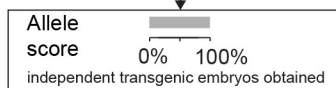

Examples shown for calibration

Images used as guidelines to score the strength of enhancer activity in the forebrain

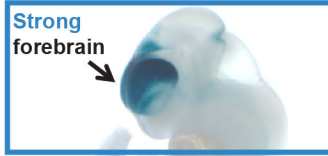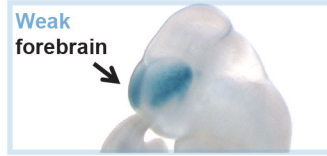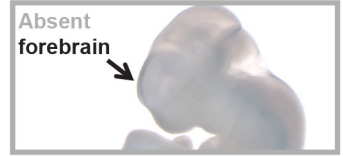

Reference allele

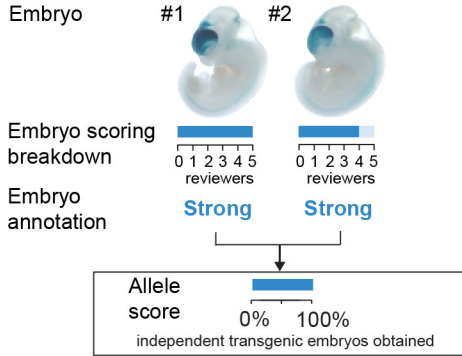

5% of bp mutated allele #1

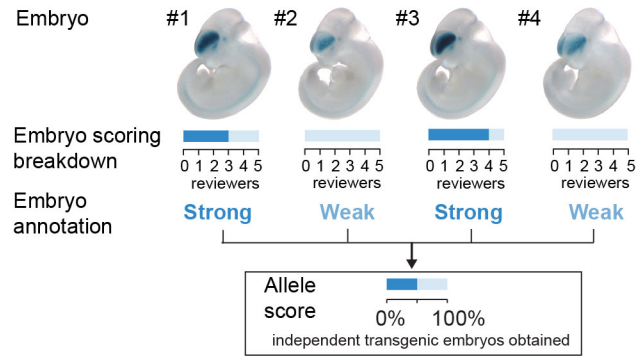

5% of bp mutated allele #2

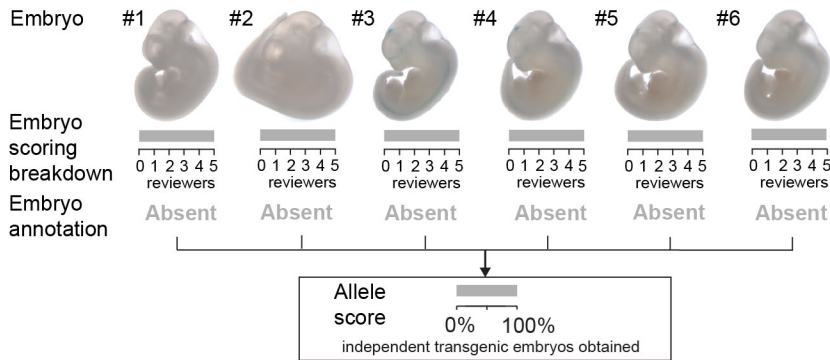

Scoring of staining in the individual embryos

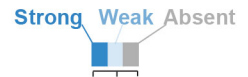

20% of bp mutated allele

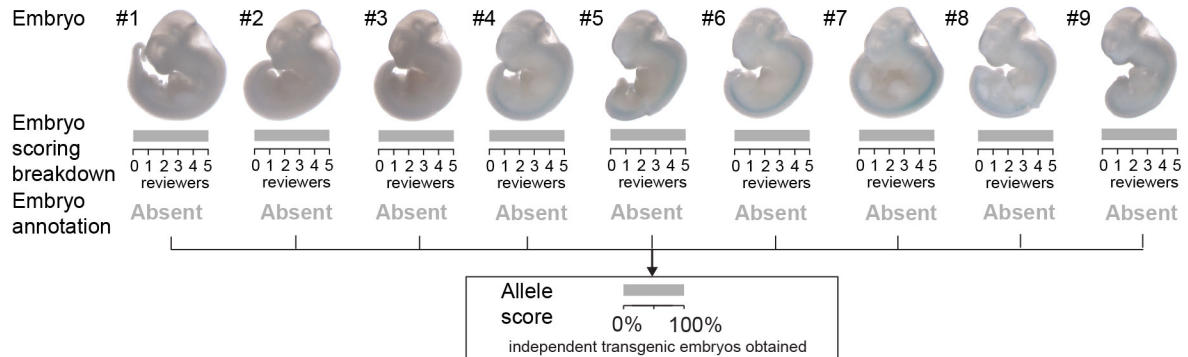

Examples shown for calibration

Images used as guidelines to score the strength of enhancer activity in the dorsal root ganglion and cranial nerve

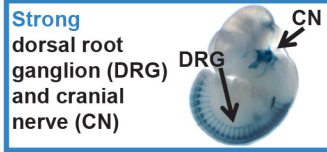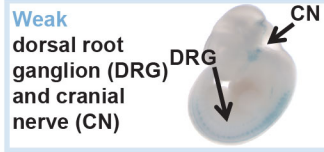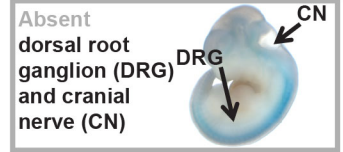

Reference allele

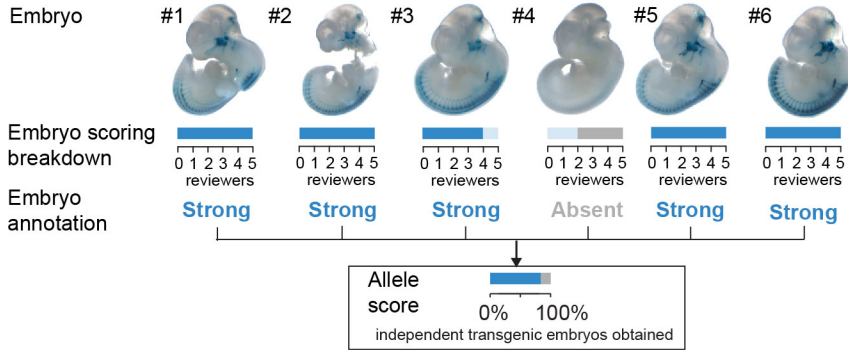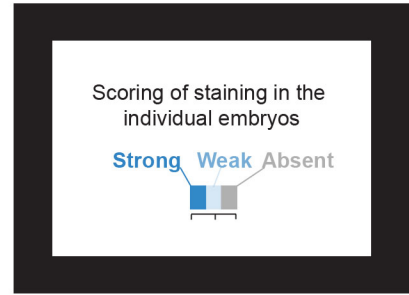

2% of bp mutated allele

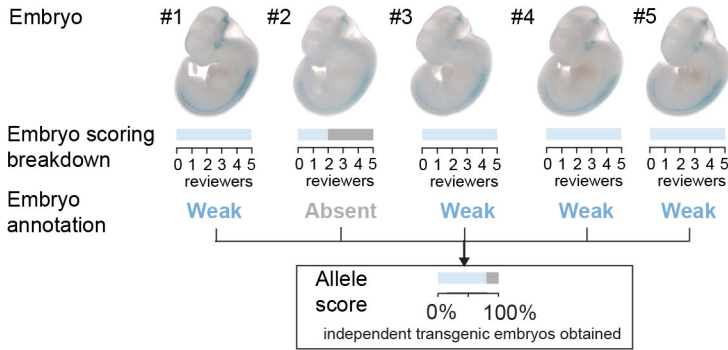

5% of bp mutated allele #2

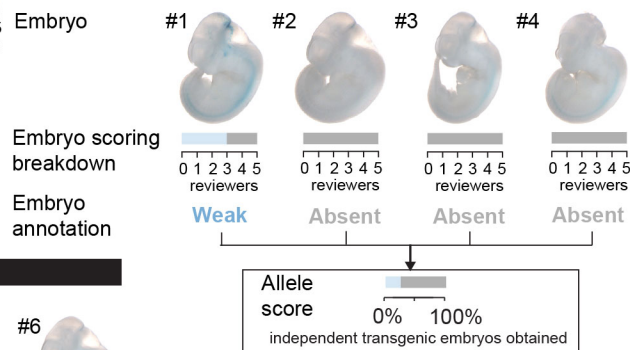

5% of bp mutated allele #1

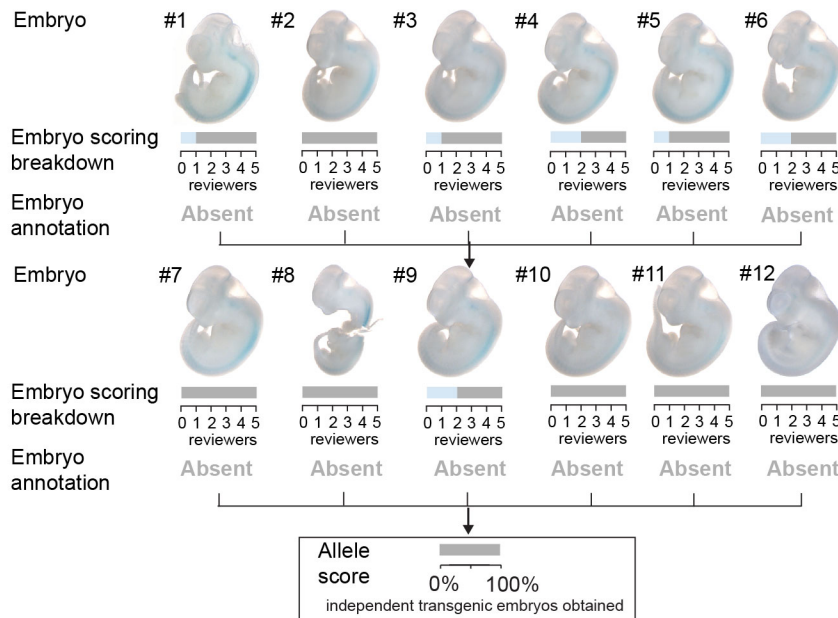



Examples shown for calibration

Images used as guidelines to score the strength of enhancer activity in the forebrain and hindbrain

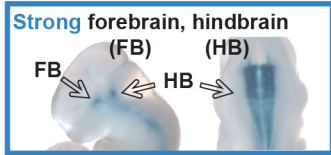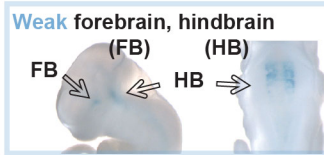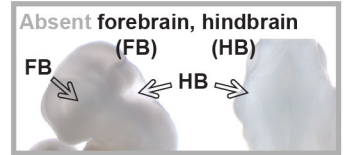

Reference allele

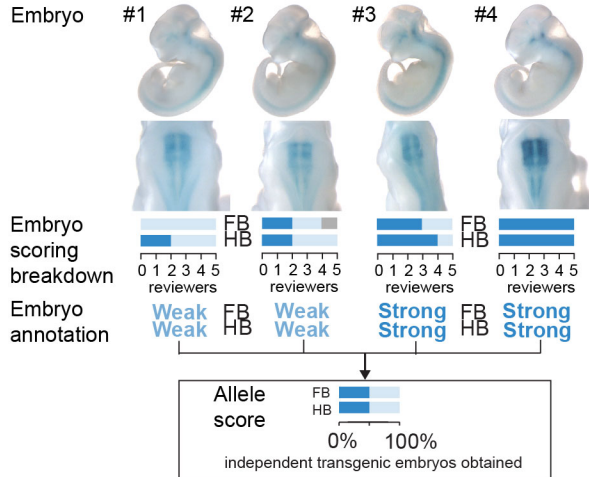

5% of bp mutated allele #1

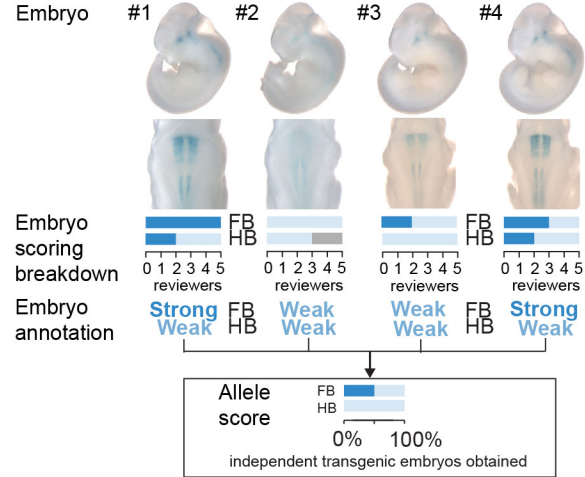

5% of bp mutated allele #2

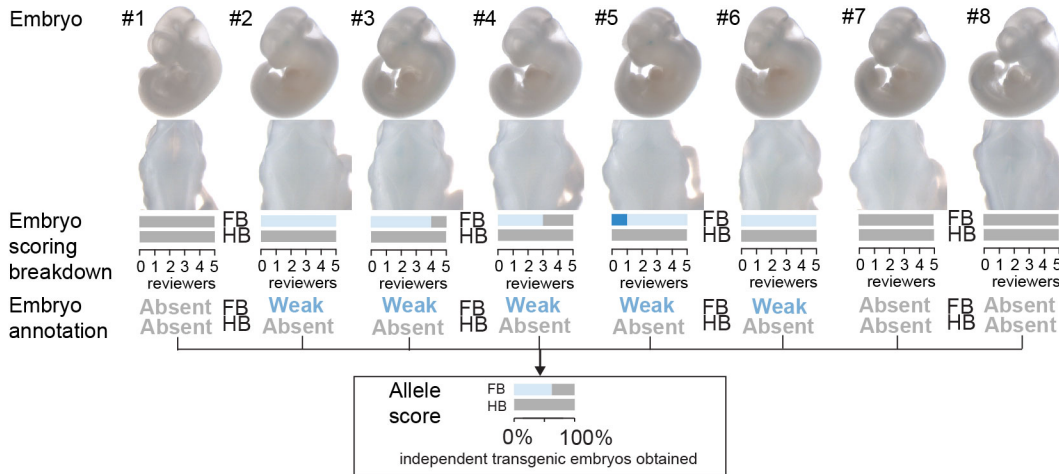

20% of bp mutated allele

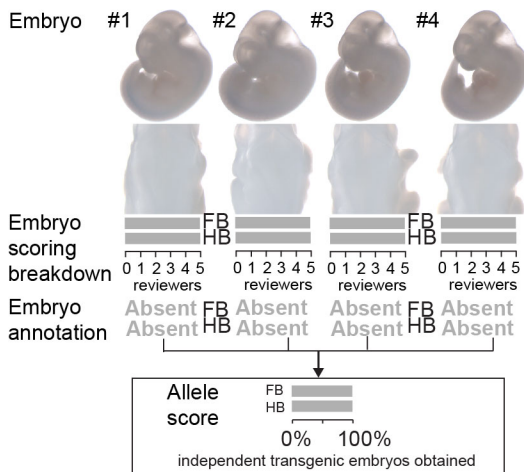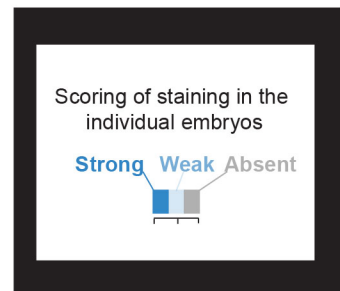

Examples shown for calibration

Images used as guidelines to score the strength of enhancer activity in the midbrain, hindbrain, and neural tube

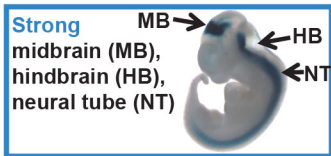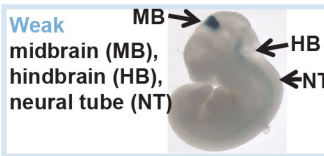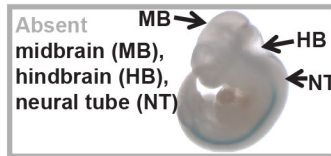

Reference allele

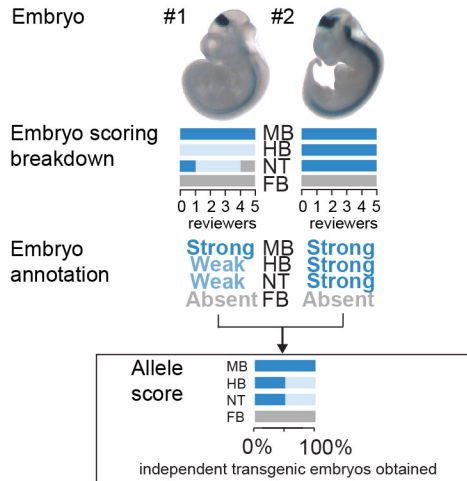

Images used as guidelines to score the gain of enhancer activity in the forebrain

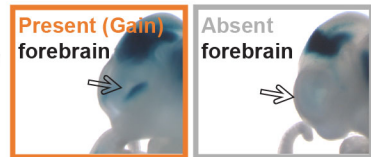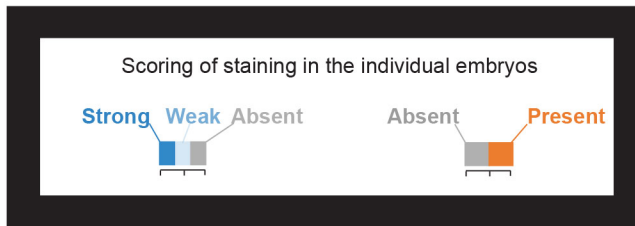

5% of bp mutated allele #1

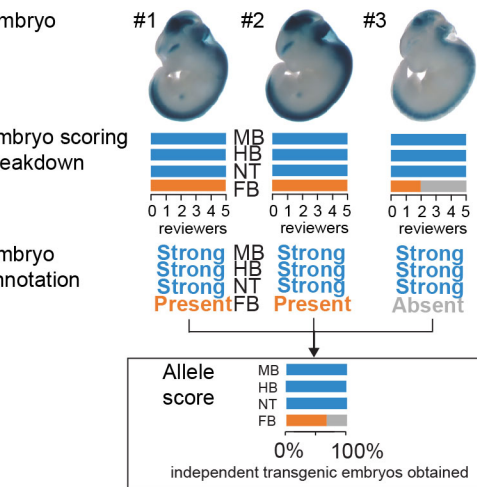

5% of bp mutated allele #2

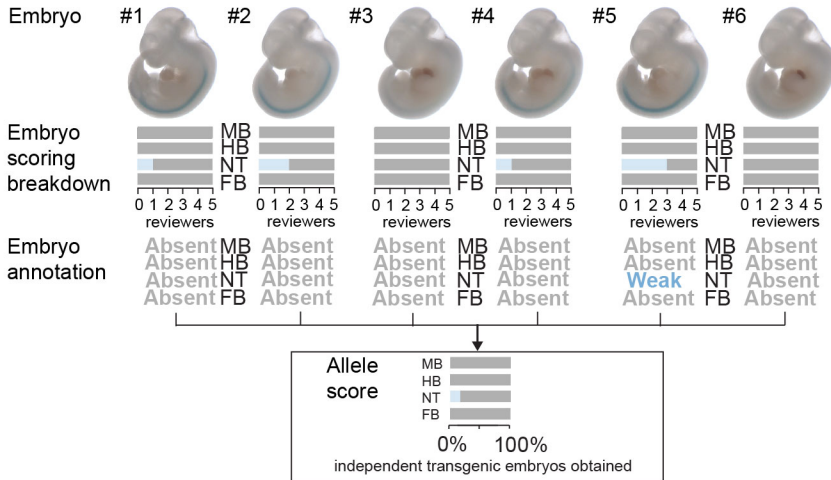

20% of bp mutated allele

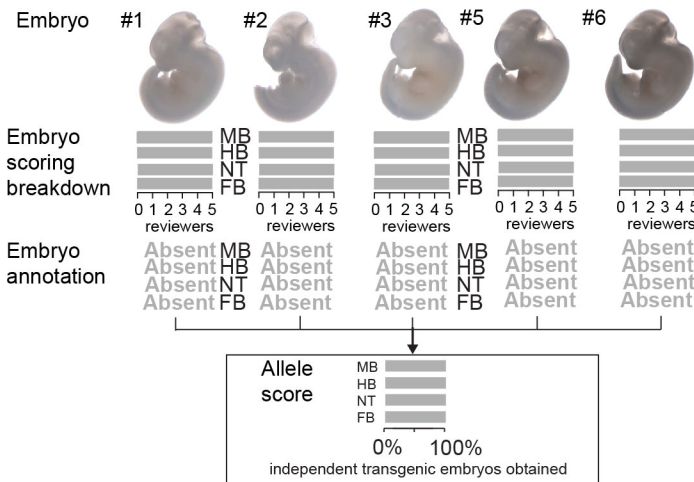

Examples shown for calibration

Images used as guidelines to score the strength of enhancer activity in the forebrain

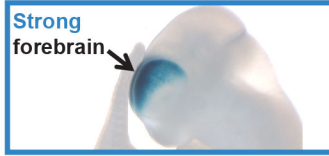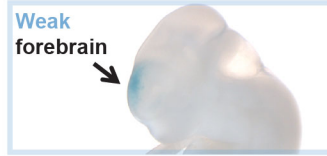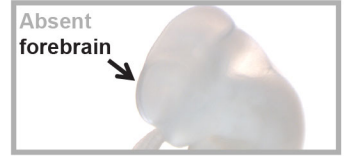

Reference allele

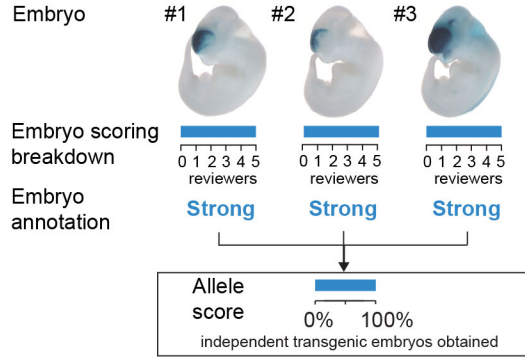

5% of bp mutated allele #1

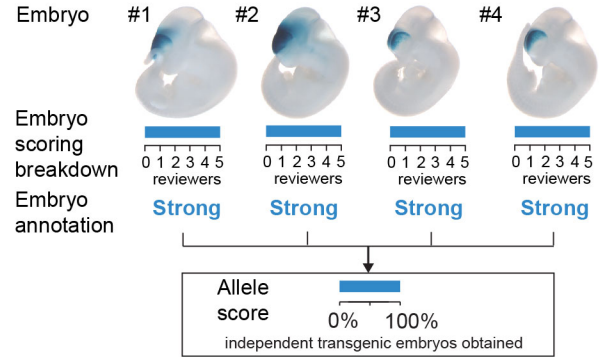

5% of bp mutated allele #2

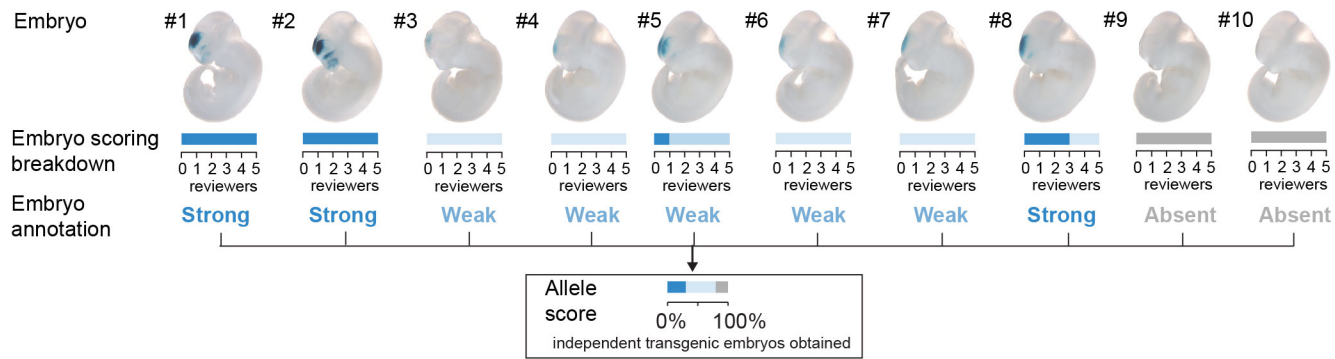

20% of bp mutated allele

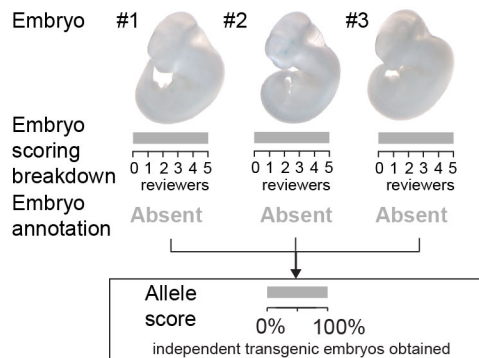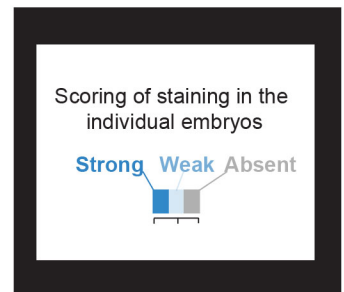



Examples shown for calibration

Images used as guidelines to score the strength of enhancer activity in the forebrain, midbrain, hindbrain, and neural tube

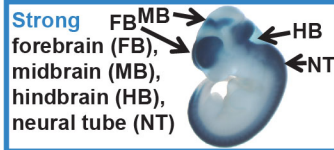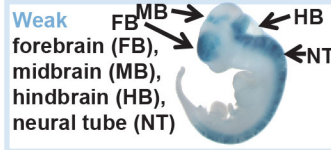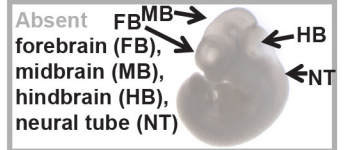

Reference allele

2% of bp mutated allele

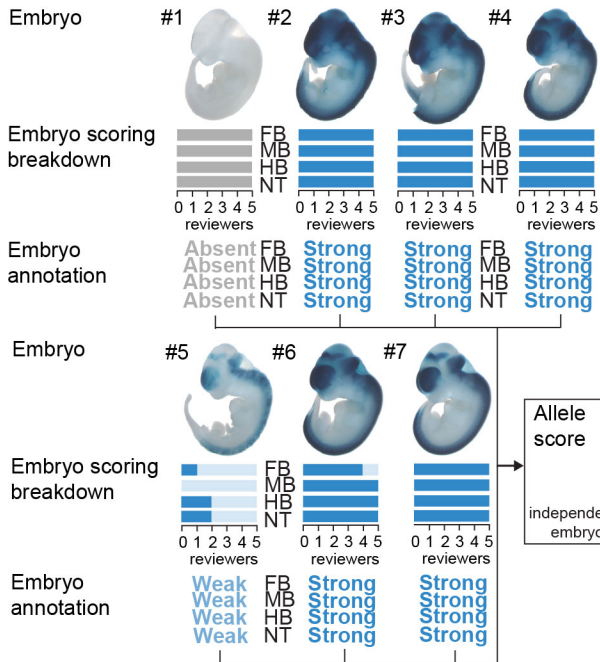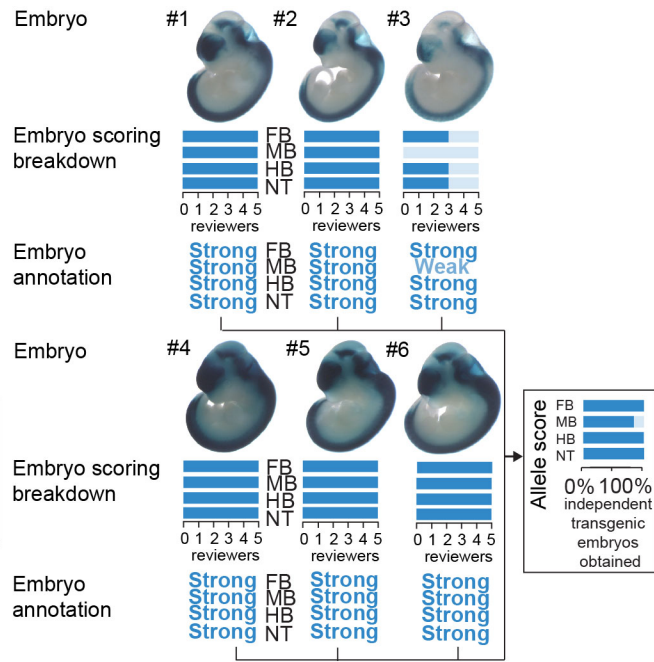

5% of bp mutated allele #1

5% of bp mutated allele #2

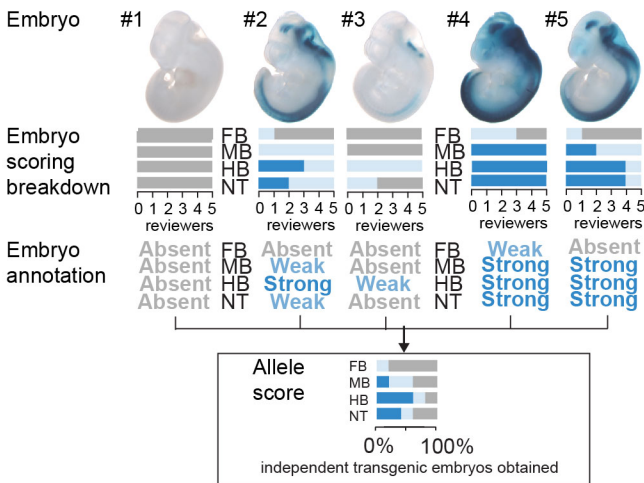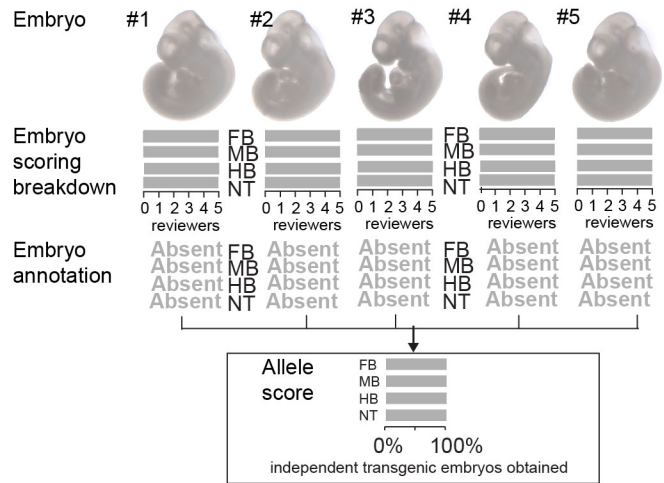

20% of bp mutated allele

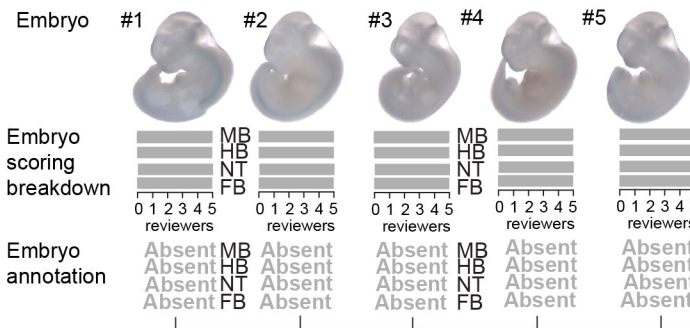

Scoring of staining in the individual embryos

Strong Weak Absent

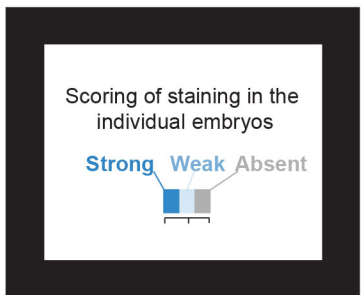

Examples shown for calibration

Images used as guidelines to score the strength of enhancer activity in the forebrain

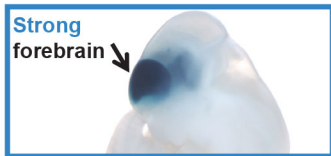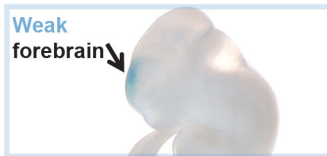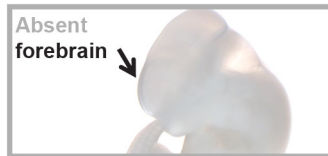

Reference allele

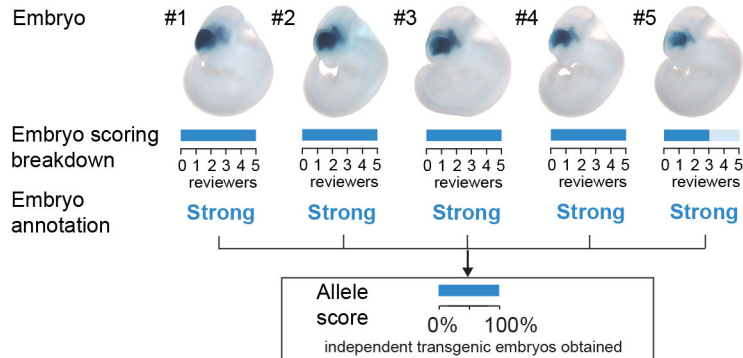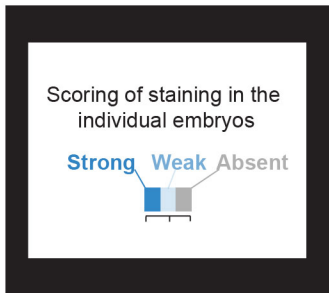

5% of bp mutated allele #1

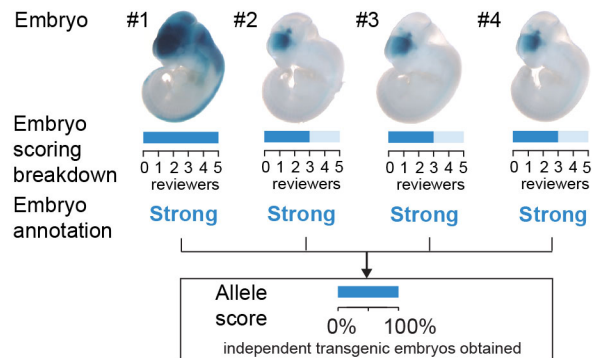

5% of bp mutated allele #2

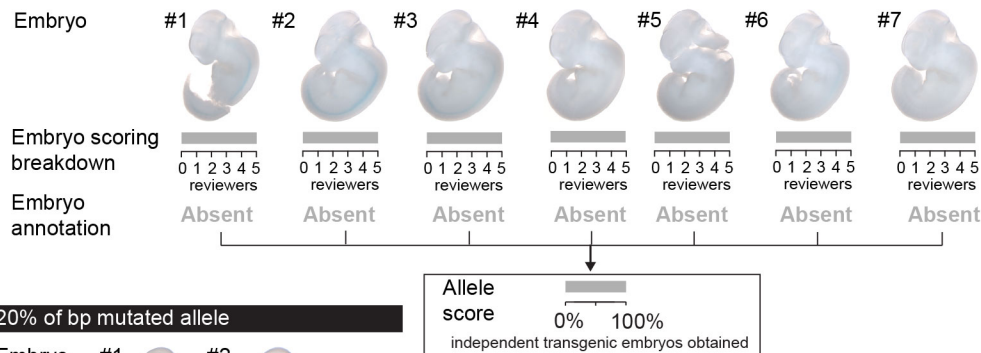

20% of bp mutated allele

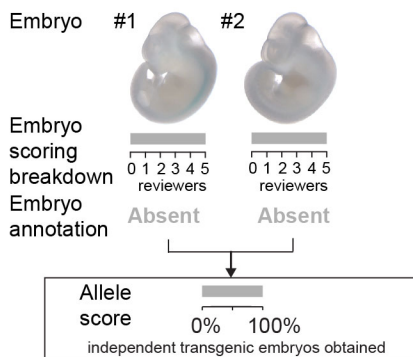



Examples shown for calibration

Images used as guidelines to score the strength of enhancer activity in the midbrain, hindbrain, and heart

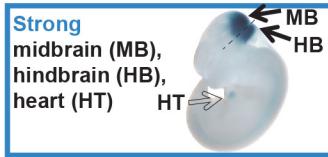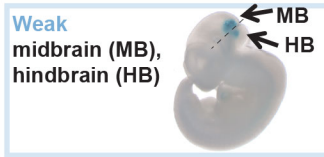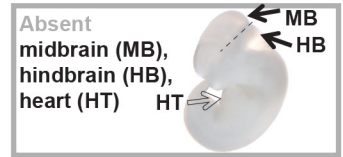

Reference allele

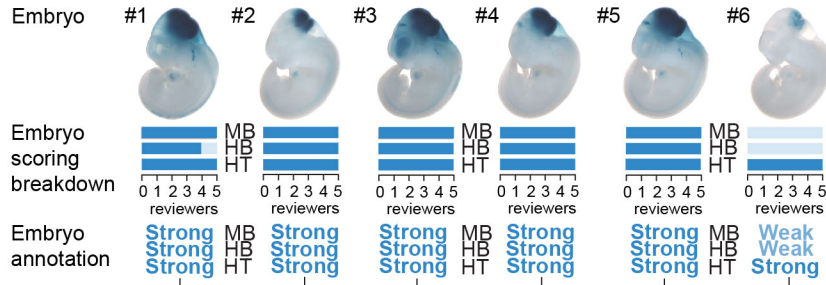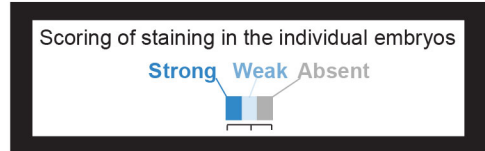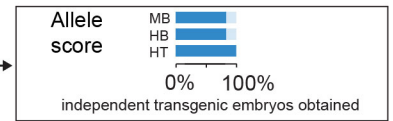

2% of bp mutated allele

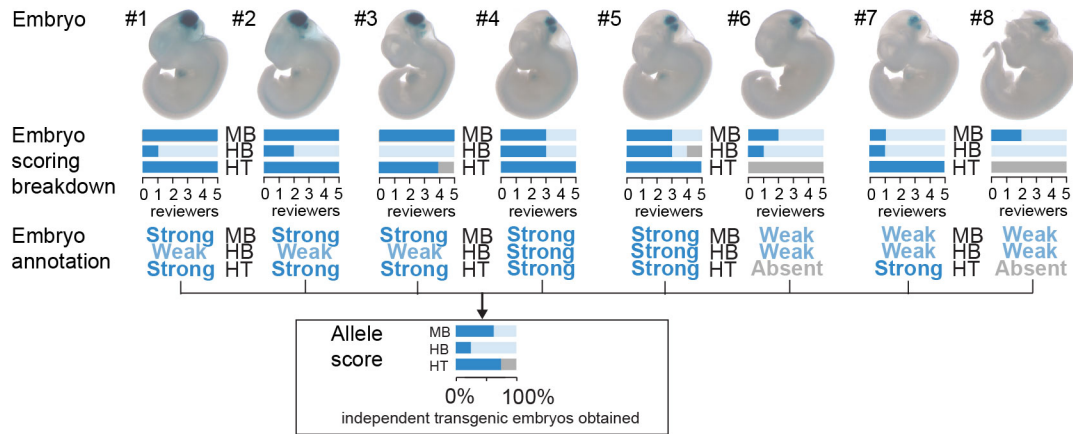

5% of bp mutated allele #1

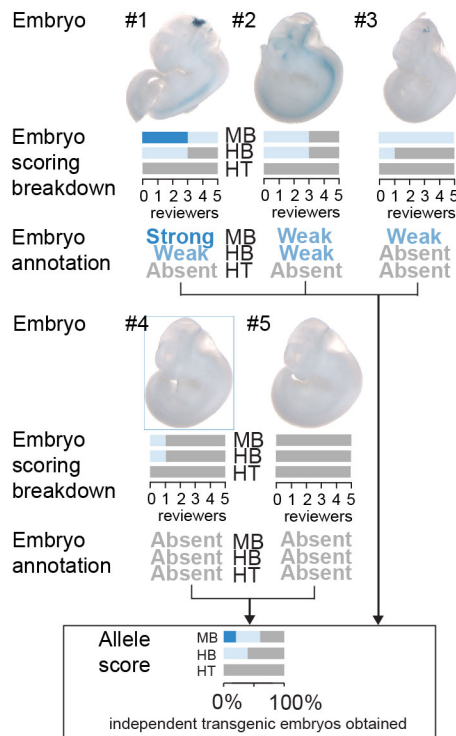

5% of bp mutated allele #2

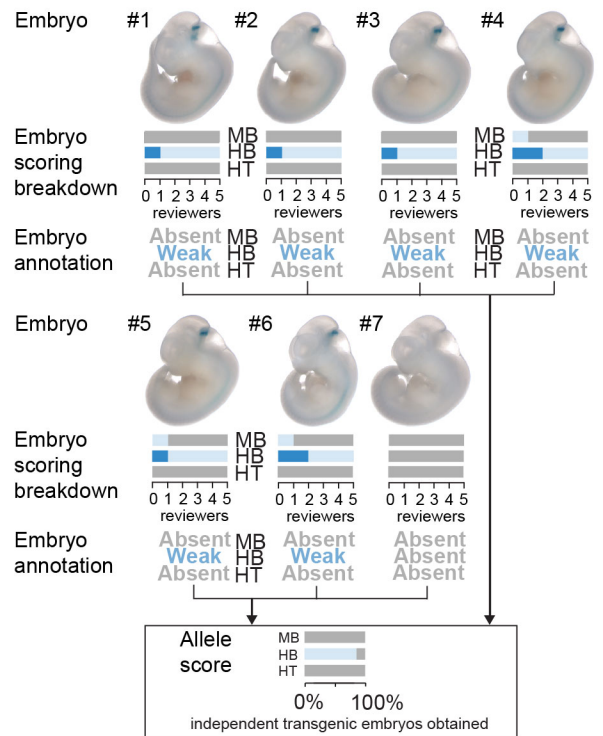

Examples shown for calibration

Images used as guidelines to score the strength of enhancer activity in the forebrain

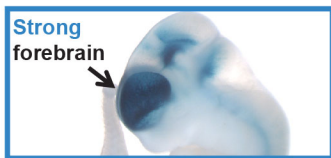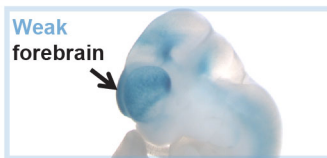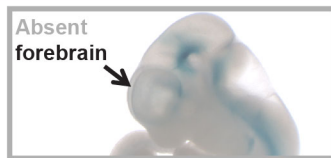

Reference allele

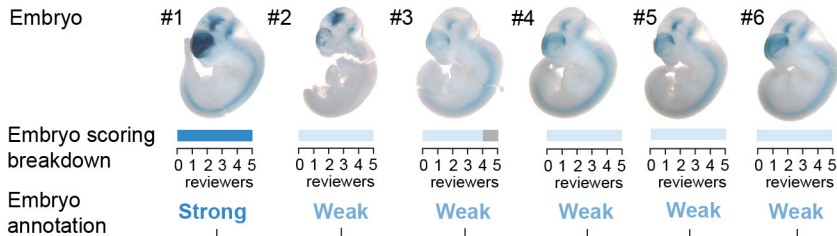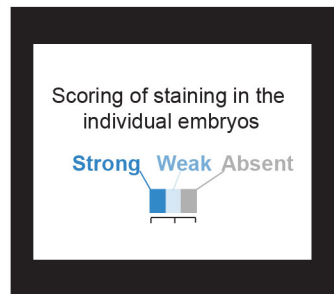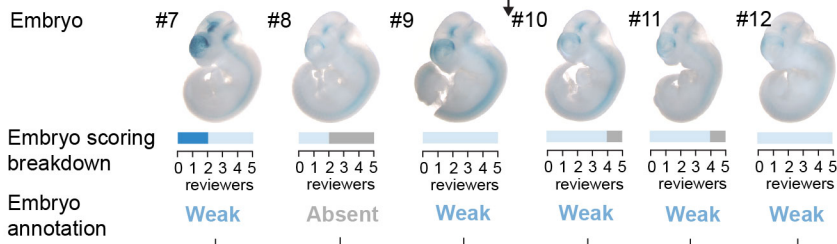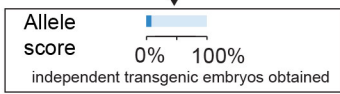

5% of bp mutated allele #2

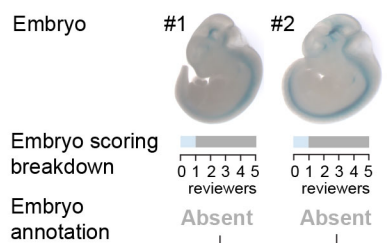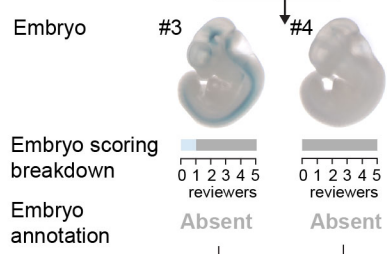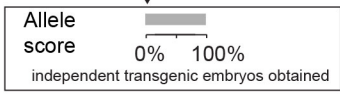

5% of bp mutated allele #1

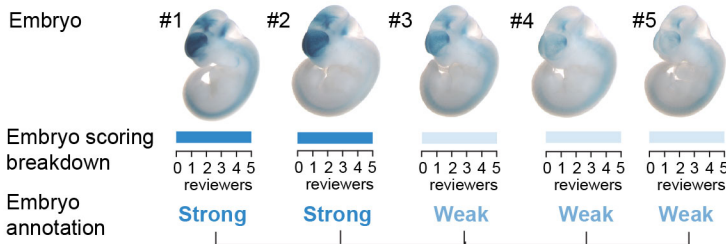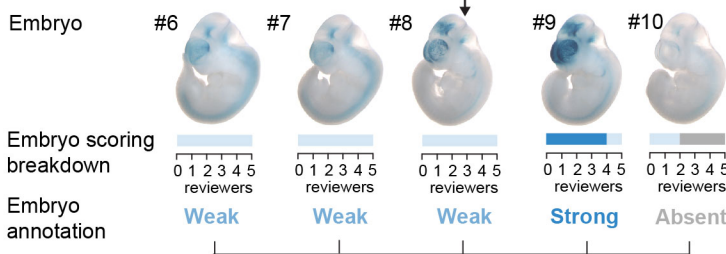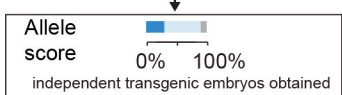

20% of bp mutated allele

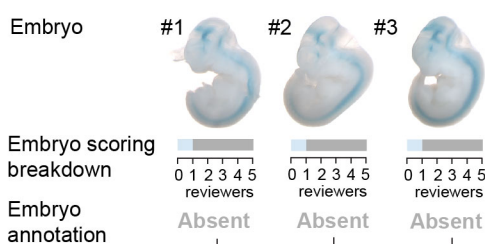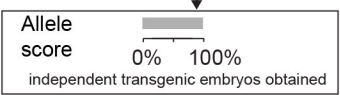

Examples shown for calibration

Images used as guidelines to score the strength of enhancer activity in the forebrain and hindbrain

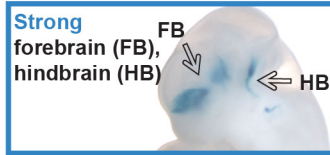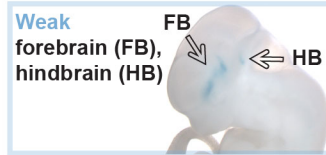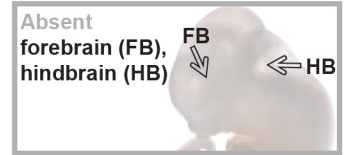

Reference allele

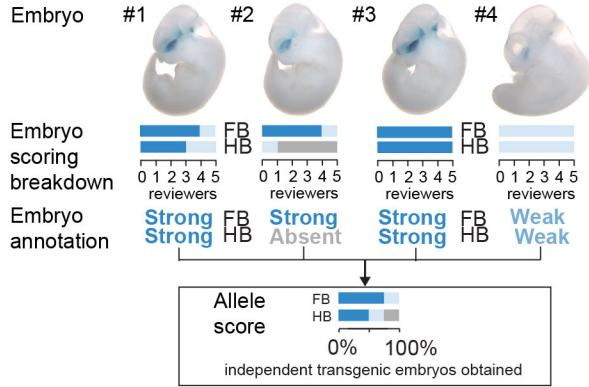

2% of bp mutated allele

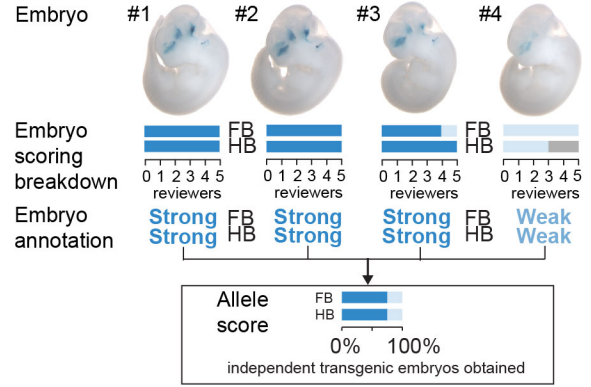

5% of bp mutated allele #1

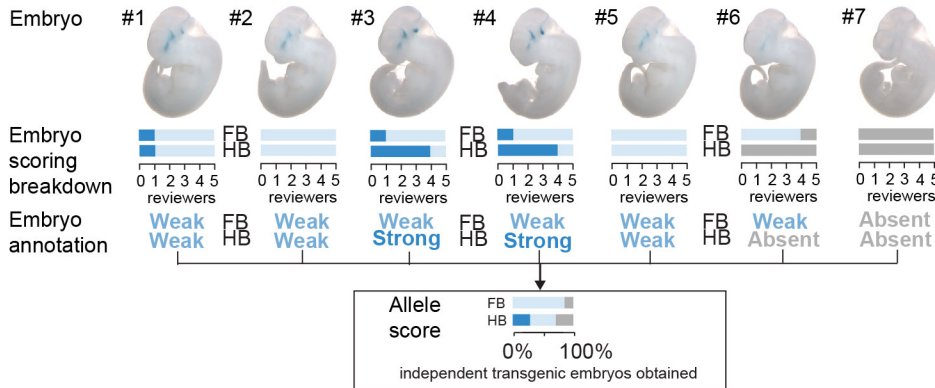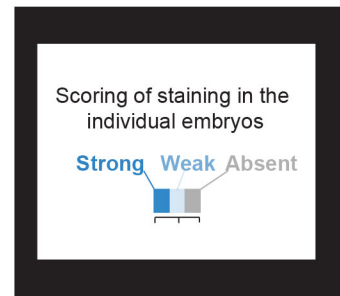

5% of bp mutated allele #2

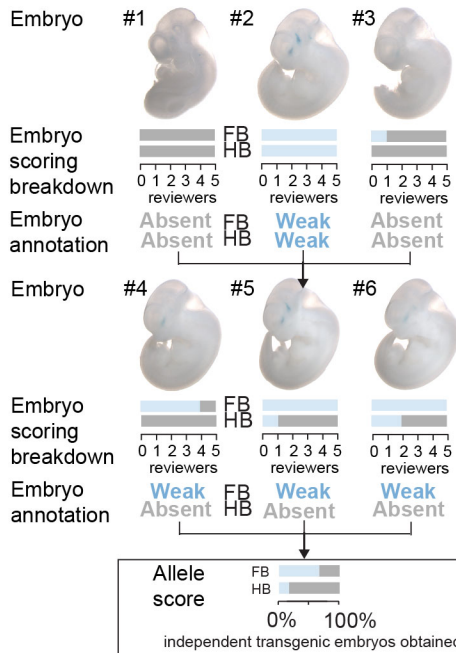

20% of bp mutated allele

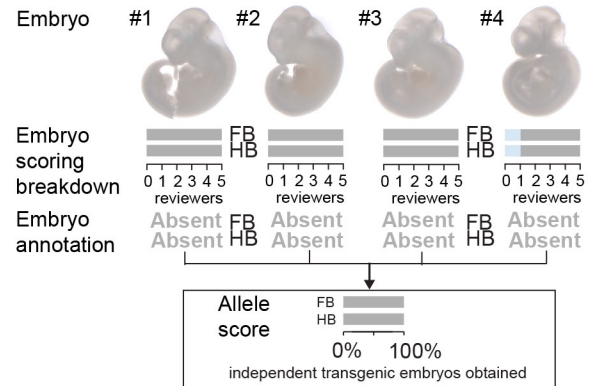



Examples shown for calibration

Images used as guidelines to score the strength of enhancer activity in the hindbrain and eye

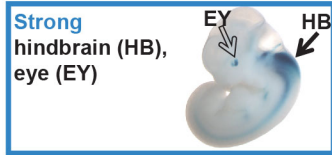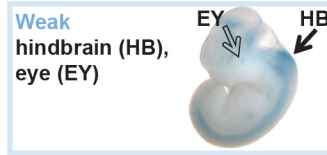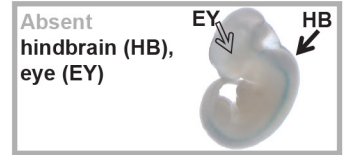

Reference allele

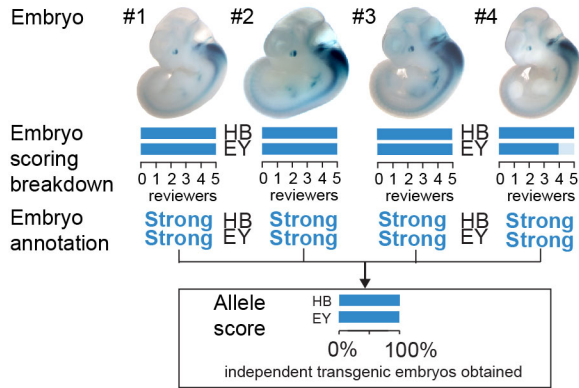

2% of bp mutated allele

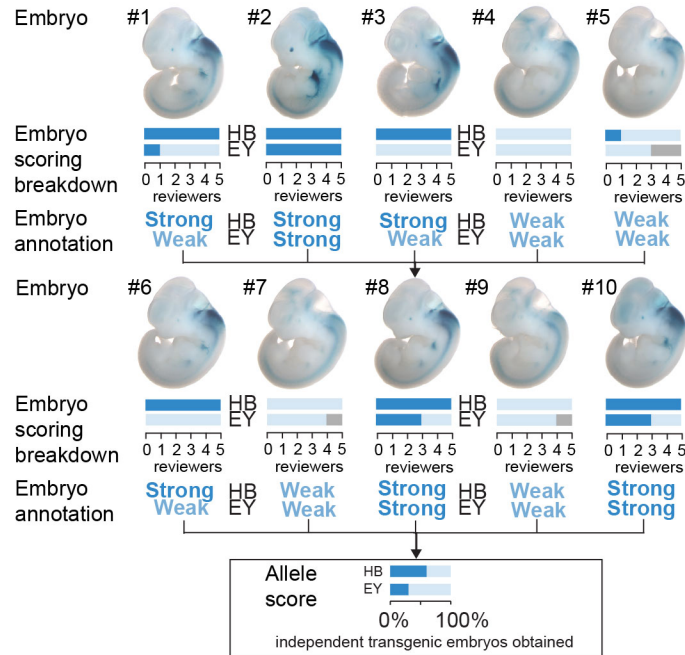

5% of bp mutated allele #1

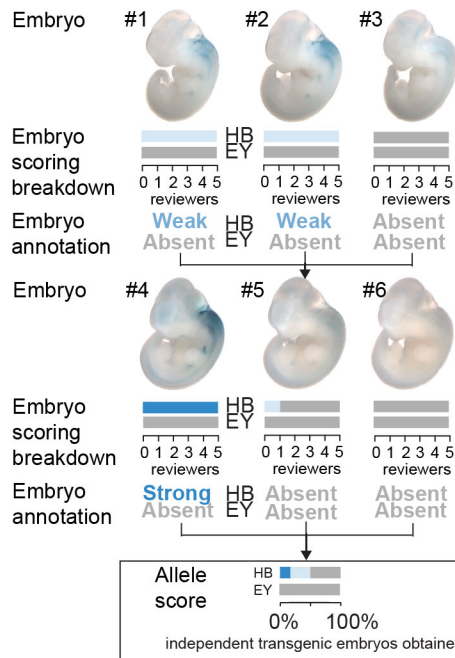

5% of bp mutated allele #2

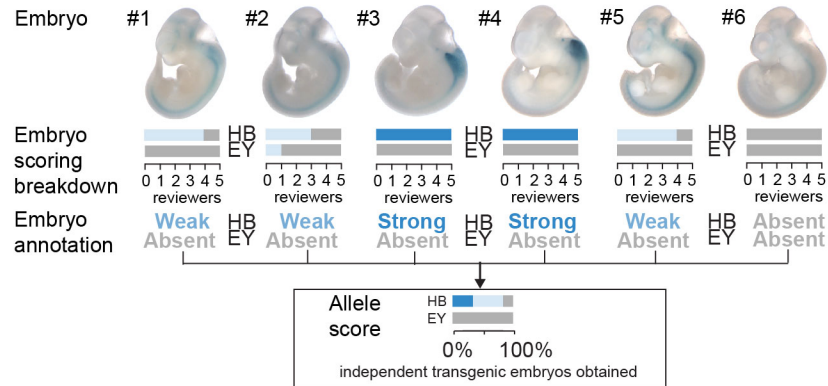

20% of bp mutated allele

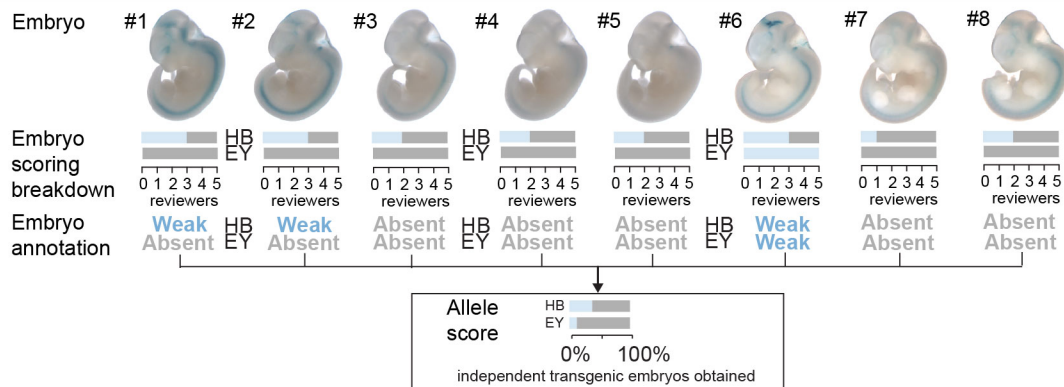

Scoring of staining in the individual embryos

**Strong Weak Absent**

Examples shown for calibration

Images used as guidelines to score the strength of enhancer activity in the hindbrain

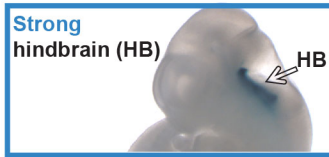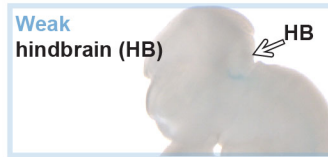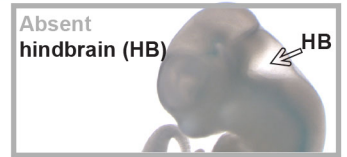

Images used as guidelines to score the gain of enhancer activity in the midbrain

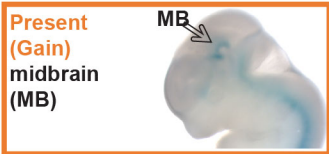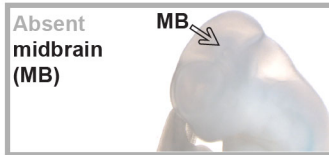

Reference allele

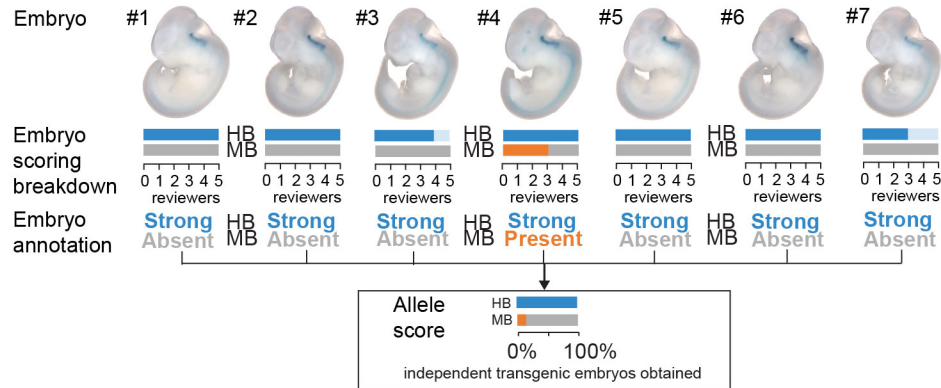

5% of bp mutated allele #1

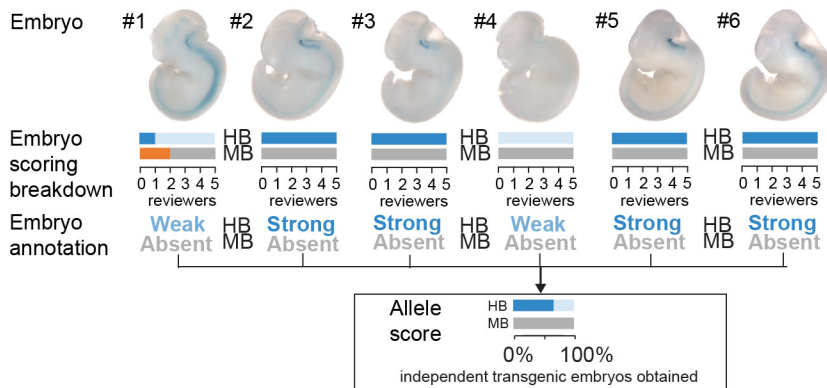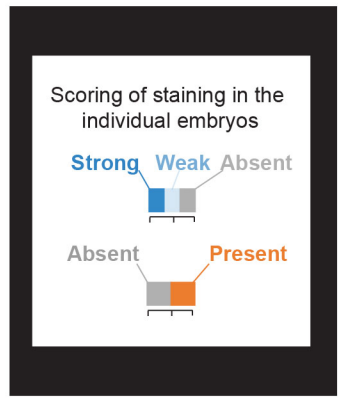

5% of bp mutated allele #2

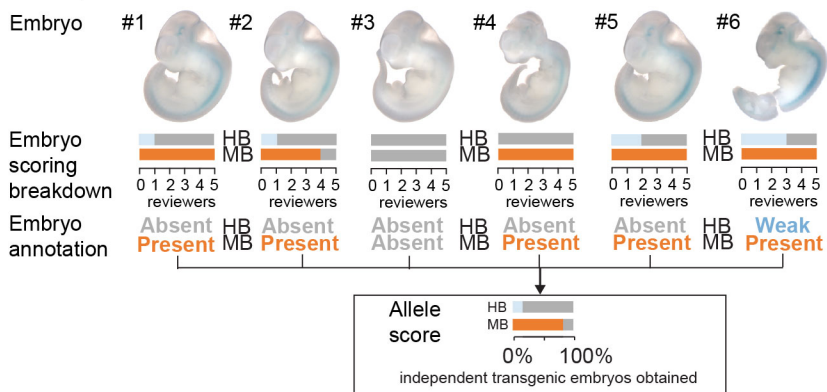

20% of bp mutated allele

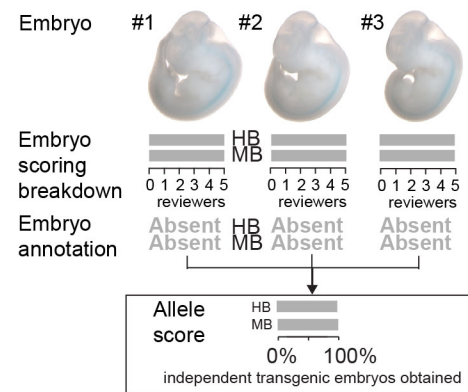

Examples shown for calibration

Images used as guidelines to score the strength of enhancer activity in the forebrain and limb

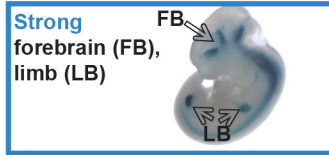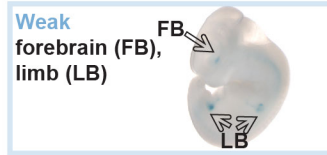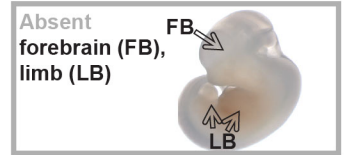

Reference allele

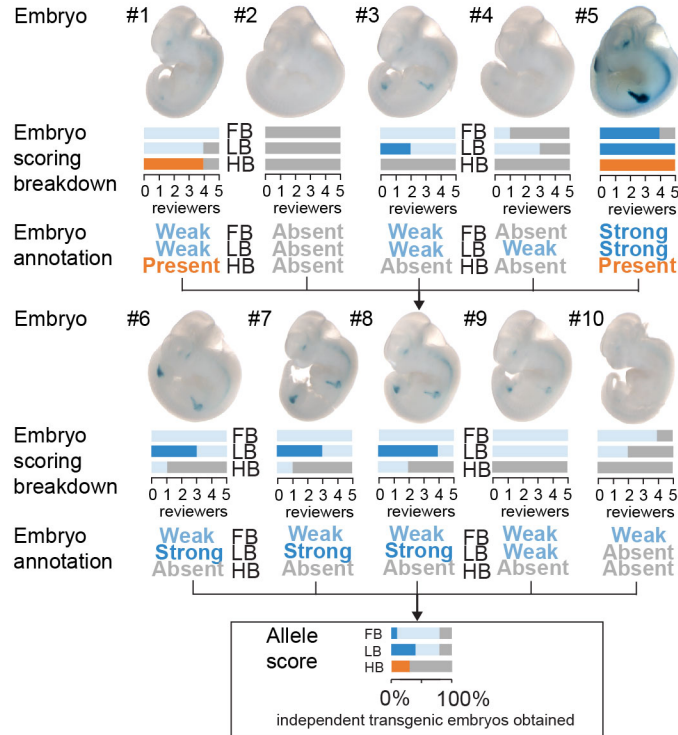

Images used as guidelines to score the gain of enhancer activity in the hindbrain

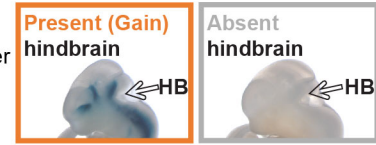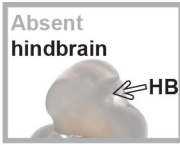

2% of bp mutated allele

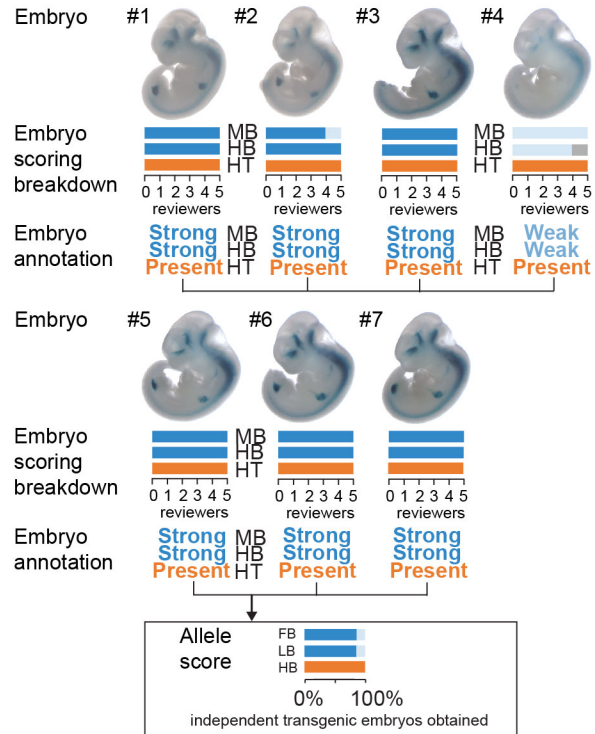

5% of bp mutated allele #1

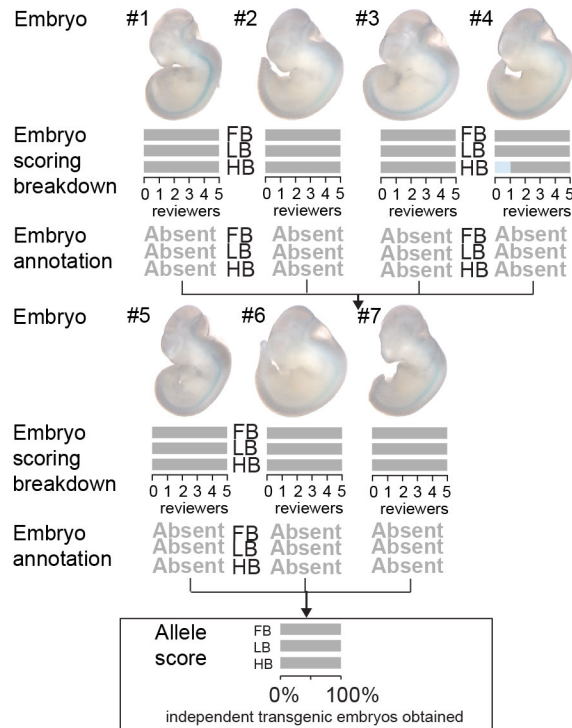

5% of bp mutated allele #2

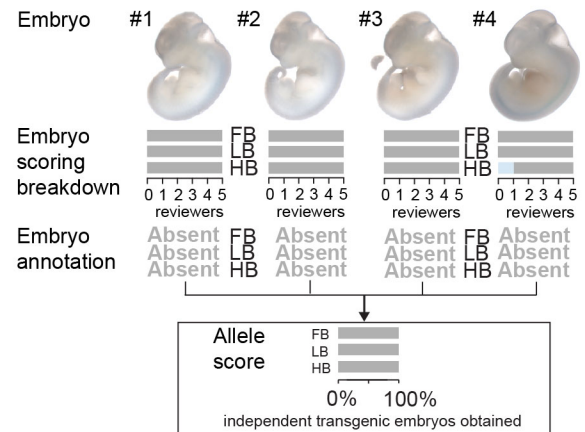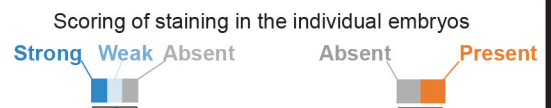



Examples shown for calibration

Images used as guidelines to score the strength of enhancer activity in the forebrain

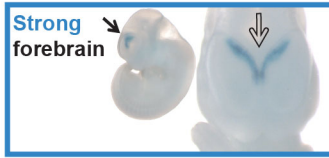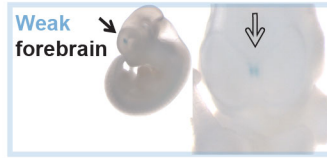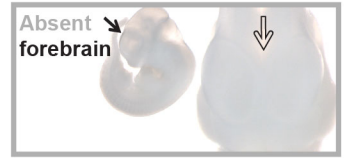

Reference allele

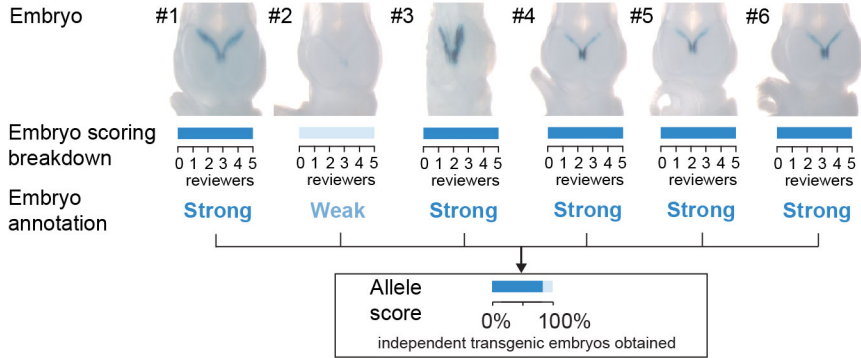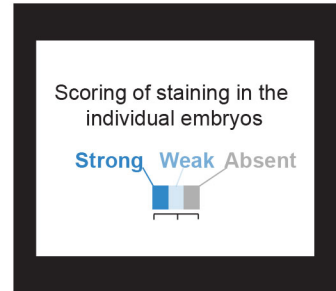

2% of bp mutated allele

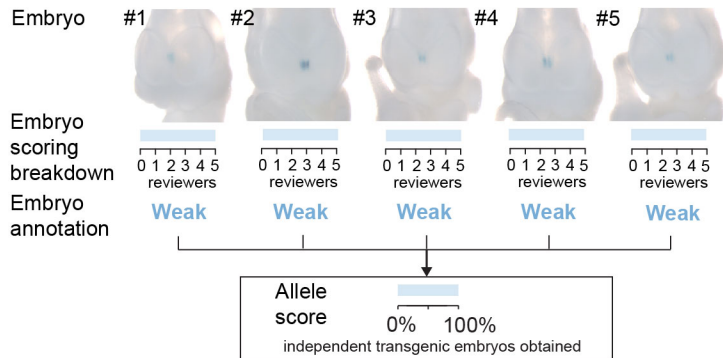

5% of bp mutated allele #1

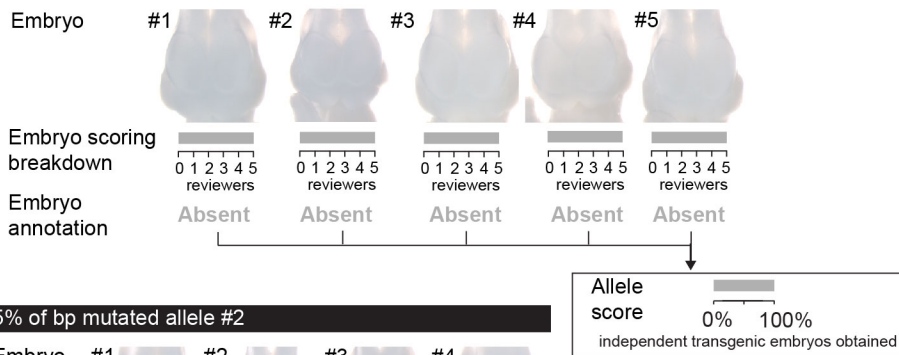

5% of bp mutated allele #2

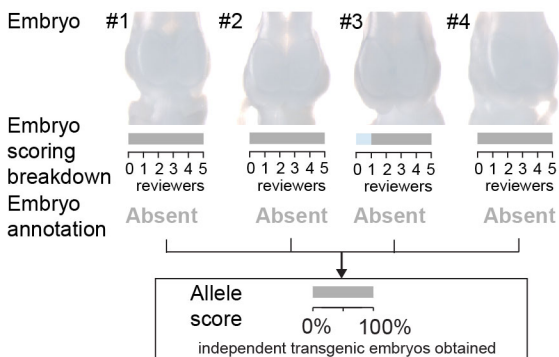

Examples shown for calibration

Images used as guidelines to score the strength of enhancer activity in the forebrain

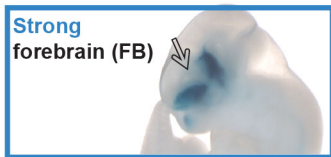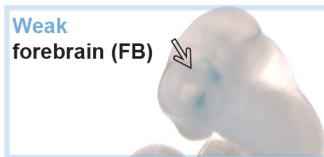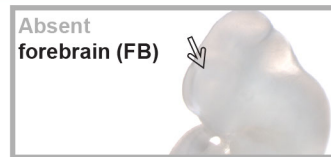

Reference allele

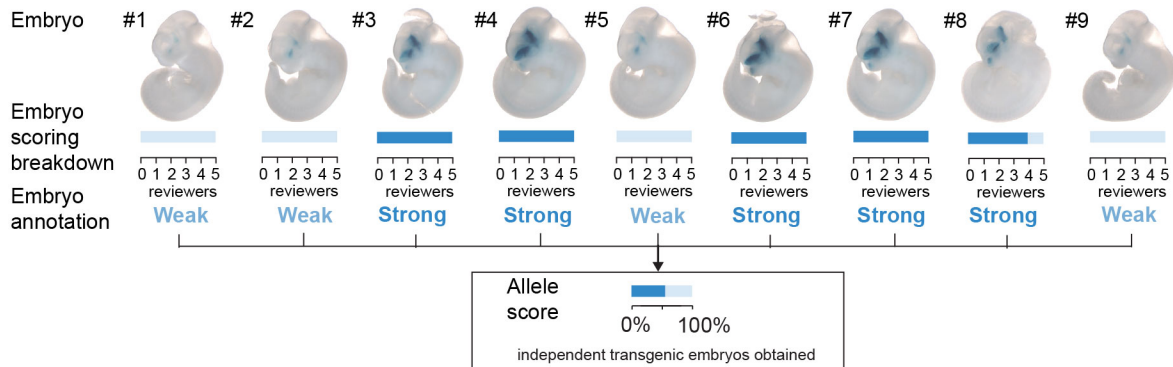

2% of bp mutated allele

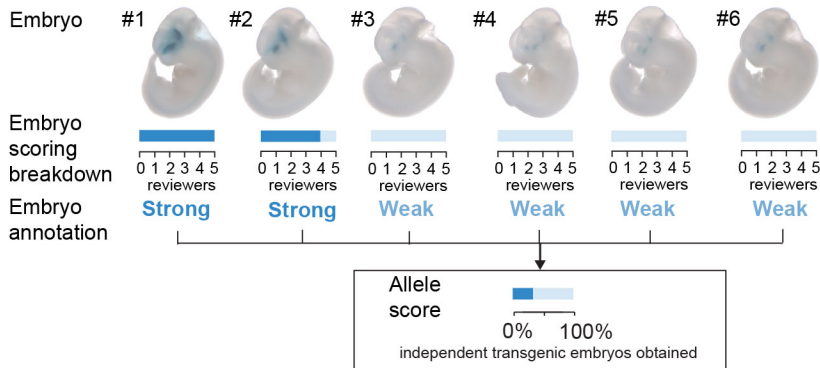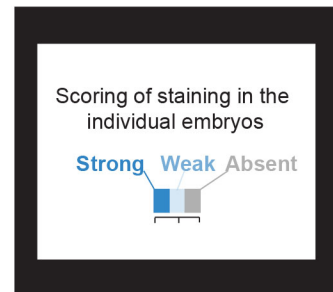

5% of bp mutated allele #1

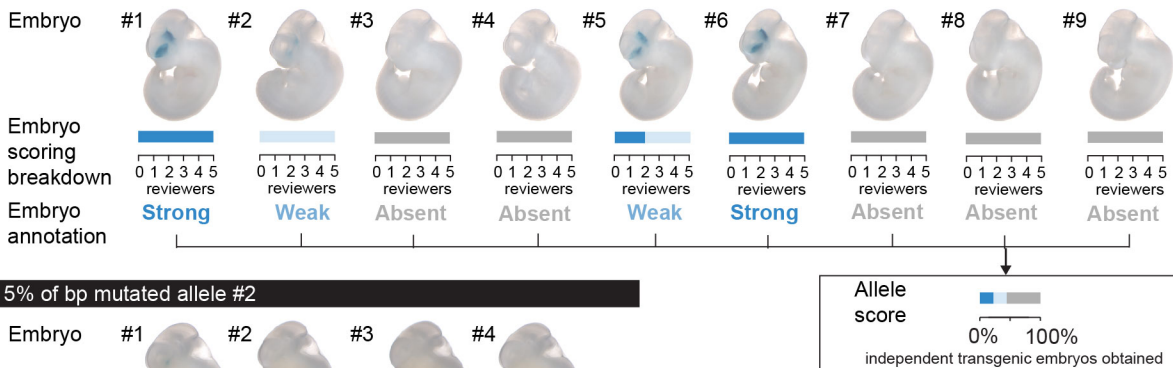

5% of bp mutated allele #2

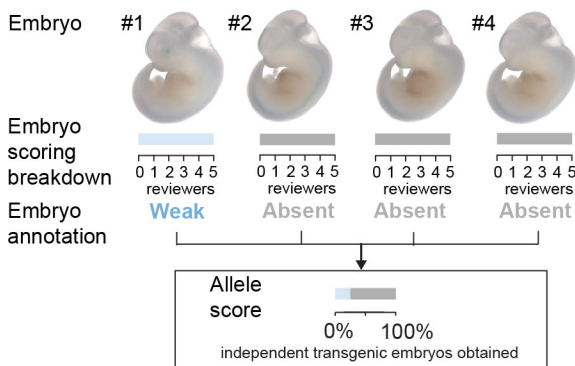



Examples shown for calibration

Images used as guidelines to score the strength of enhancer activity in the forebrain and hindbrain

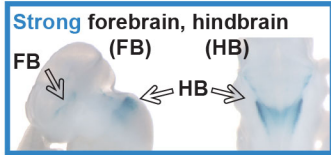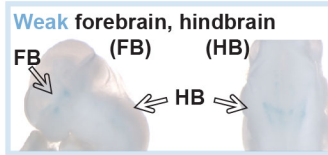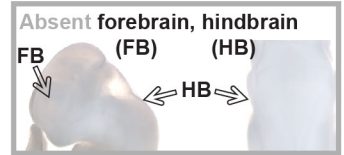

Reference allele

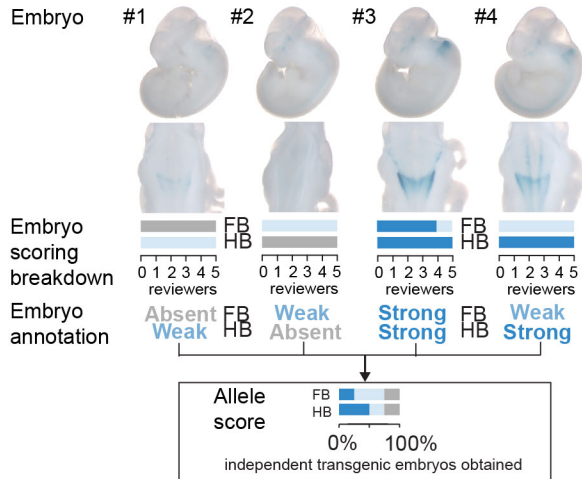

5% of bp mutated allele #2

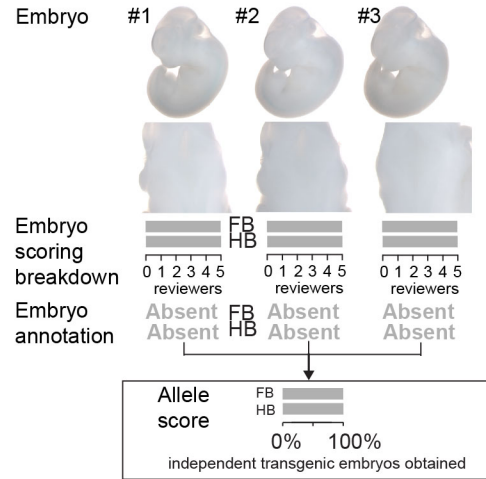

2% of bp mutated allele

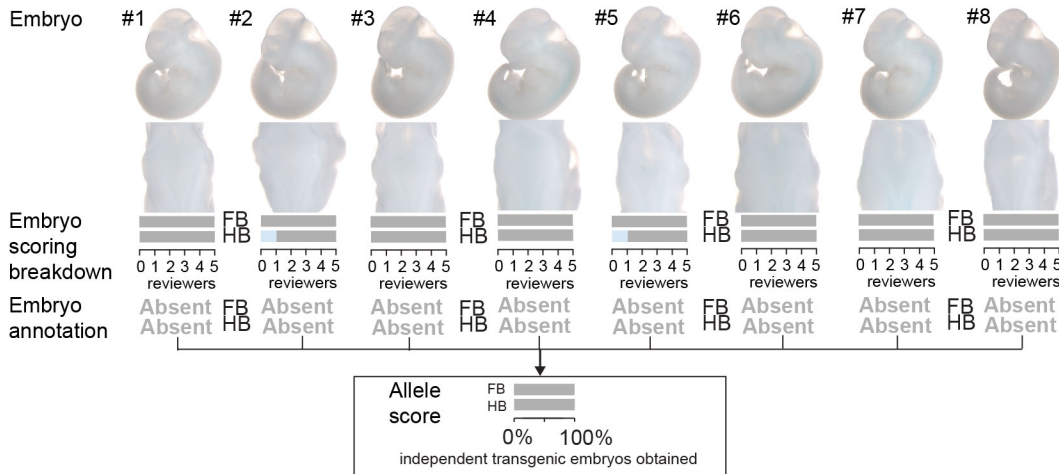

Scoring of staining in the individual embryos

5% of bp mutated allele #1

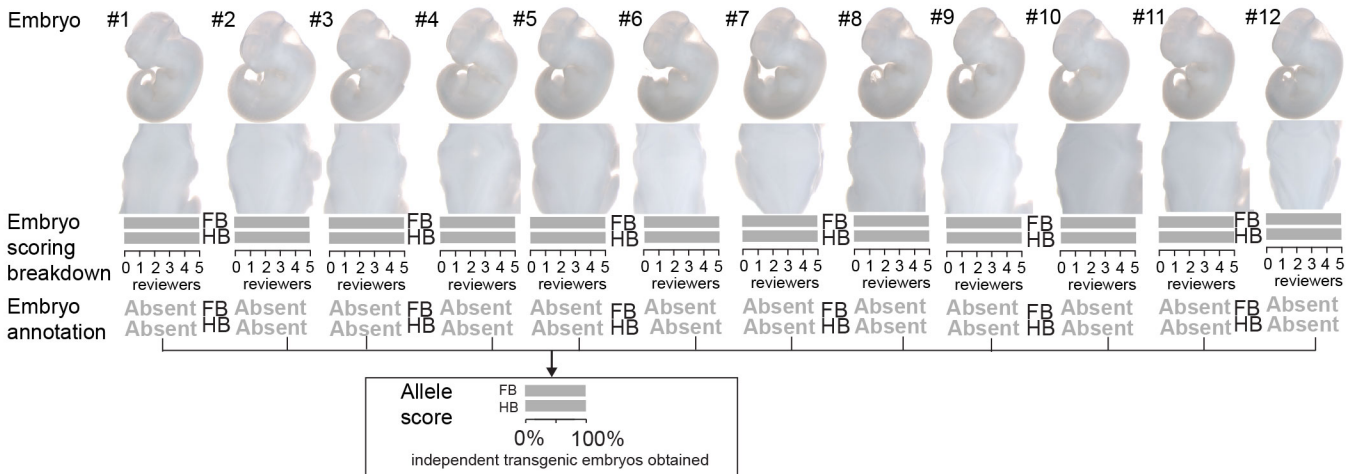

Locus: **hs111 - uc215**

e14.5

Examples shown for calibration

Images used as guidelines to score the strength of enhancer activity in the forebrain

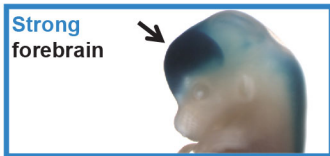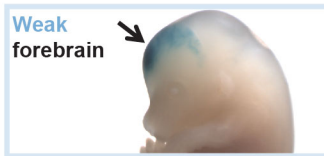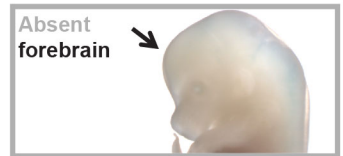

Reference allele

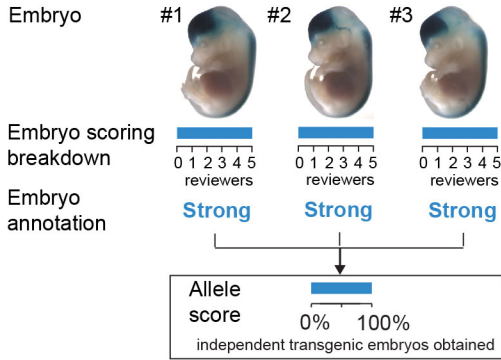

20% of bp mutated allele

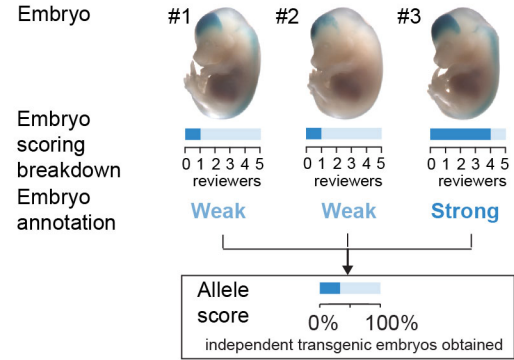

Scoring of staining in the individual embryos

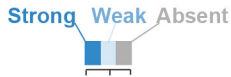

Locus: **hs121 - uc467**

e14.5

Examples shown for calibration

Images used as guidelines to score the strength of enhancer activity in the forebrain

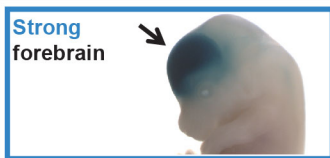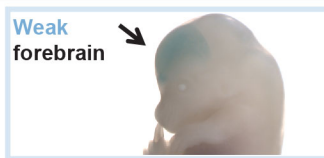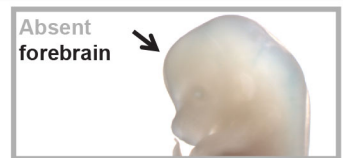

Reference allele

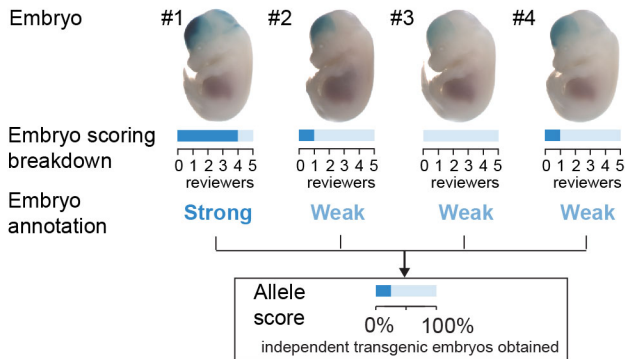

5% of bp mutated allele (#1)

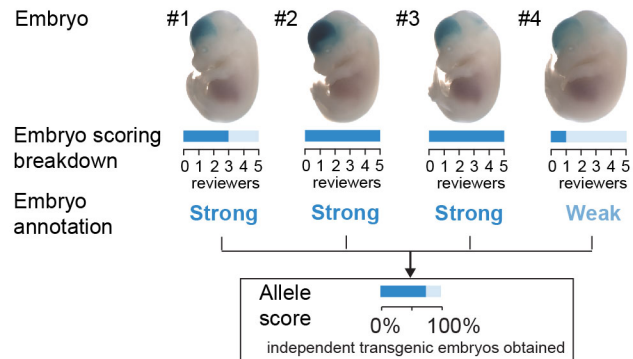

Locus: **hs123 - uc470**

e14.5

Examples shown for calibration

Images used as guidelines to score the strength of enhancer activity in the forebrain

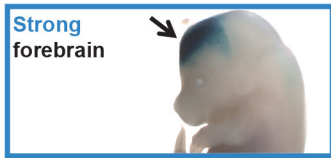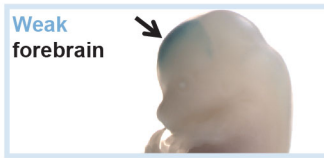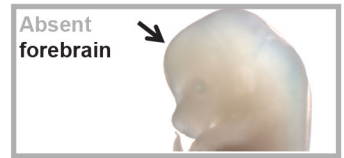

Reference allele

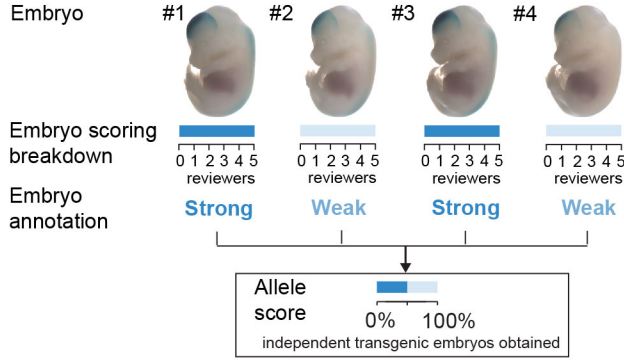

5% of bp mutated allele (#1)

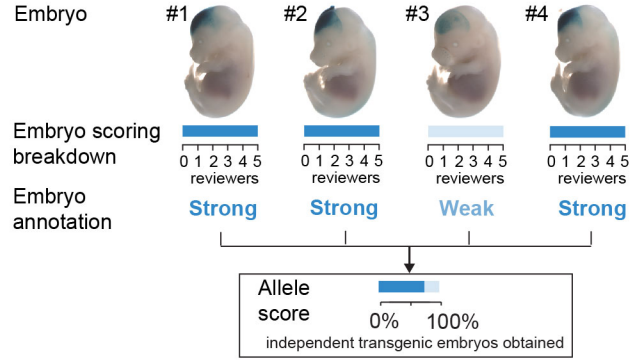

Scoring of staining in the individual embryos



Locus: **hs200 - uc025**

e14.5

Examples shown for calibration

Images used as guidelines to score the strength of enhancer activity in the forebrain and neural tube

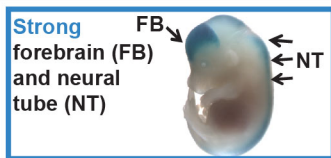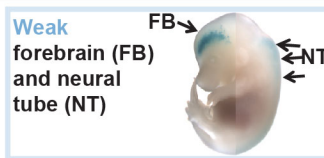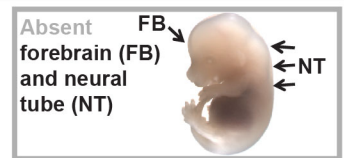

Reference allele

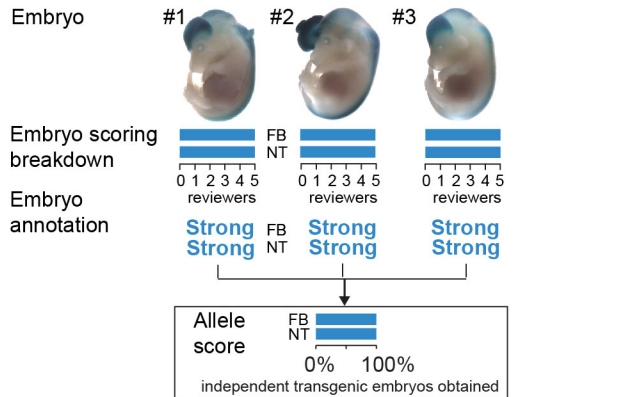

5% of bp mutated allele (#1)

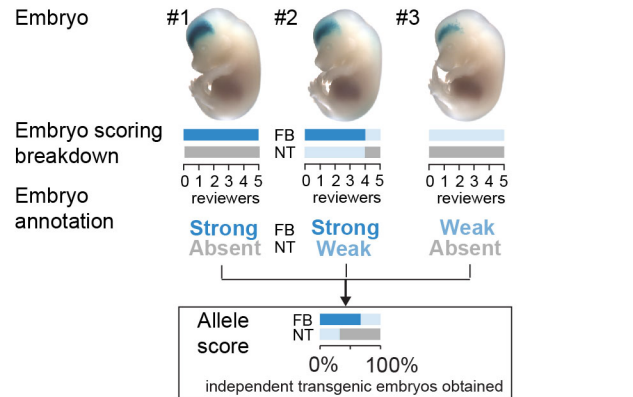

Examples shown for calibration

Images used as guidelines to score the strength of enhancer activity in the forebrain and hindbrain / neural tube

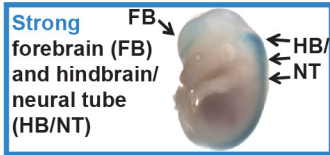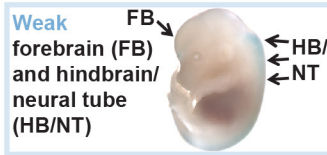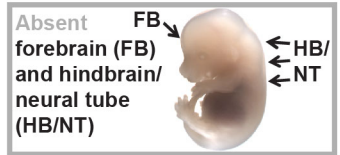

Reference allele

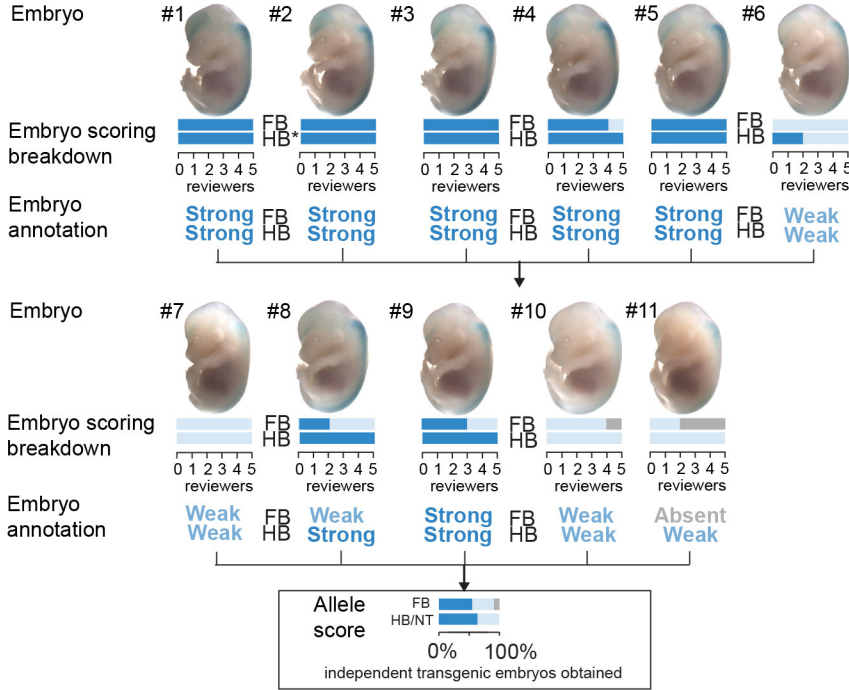

5% of bp mutated allele (#1)

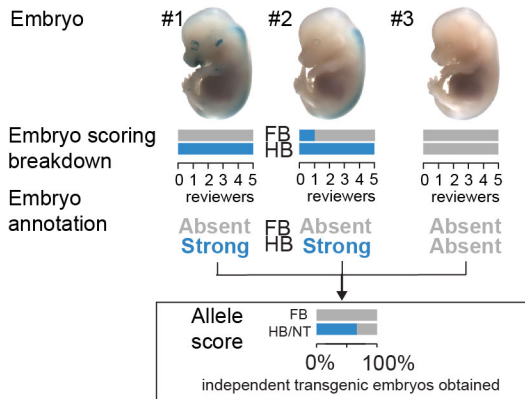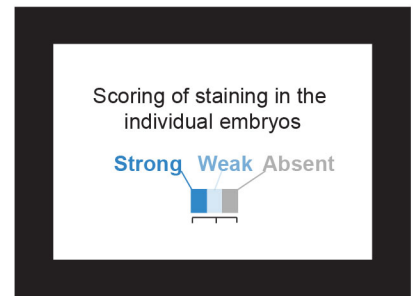

\* HB = HB/NT



Examples shown for calibration

Images used as guidelines to score the strength of enhancer activity in the midbrain and hindbrain / neural tube

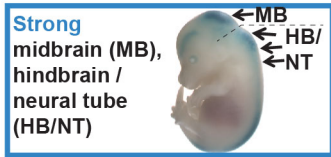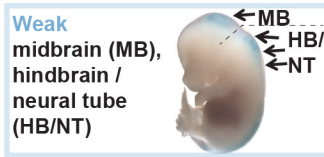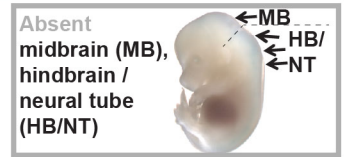

Images used as guidelines to score the gain of enhancer activity in the forebrain

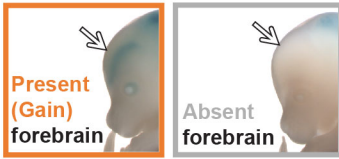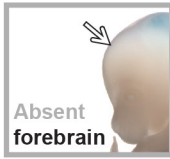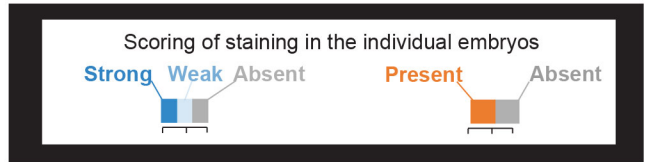

Reference allele

\* HB = HB/NT

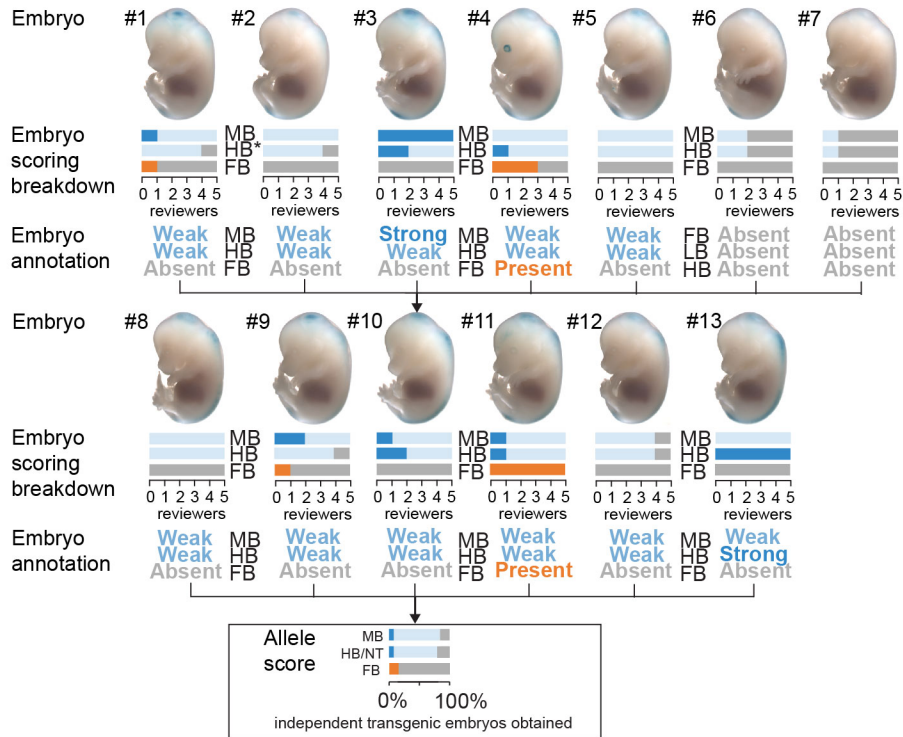

5% of bp mutated allele (#1)

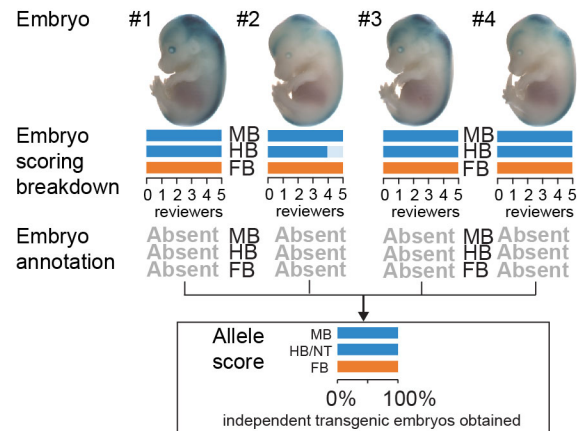

Examples shown for calibration

Images used as guidelines to score the strength of enhancer activity in the forebrain

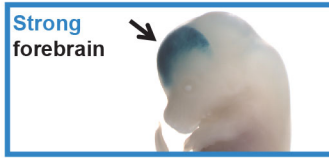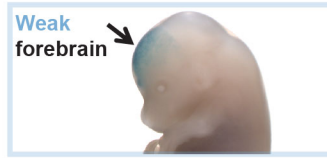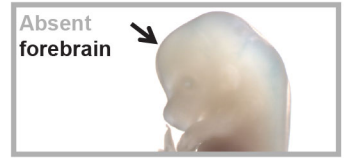

Reference allele

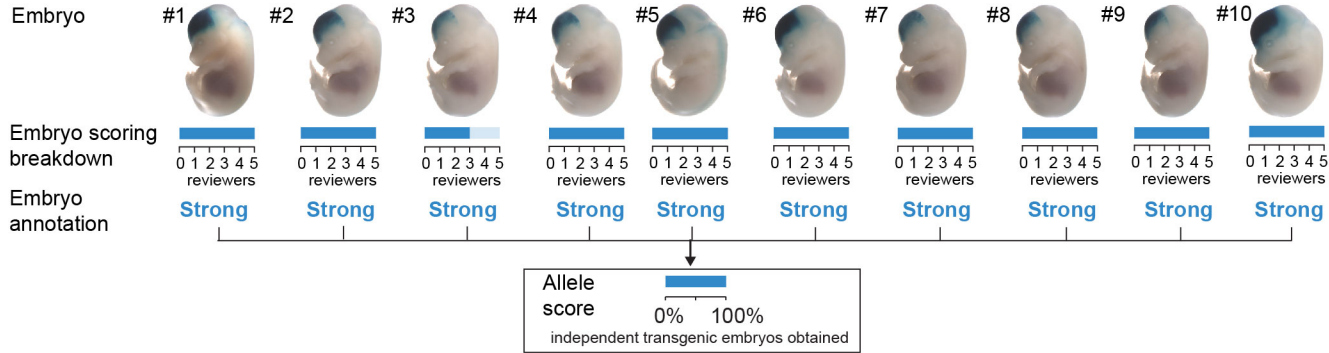

5% of bp mutated allele (#1)

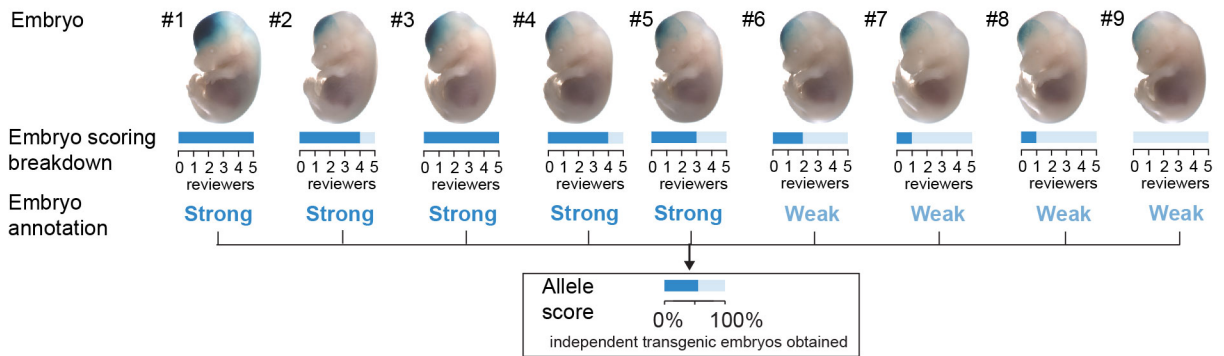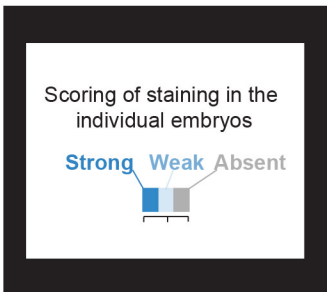

Examples shown for calibration

Images used as guidelines to score the strength of enhancer activity in the forebrain

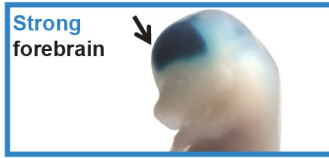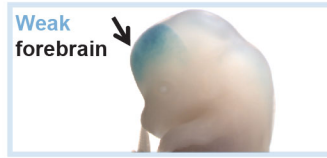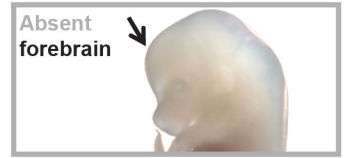

Reference allele

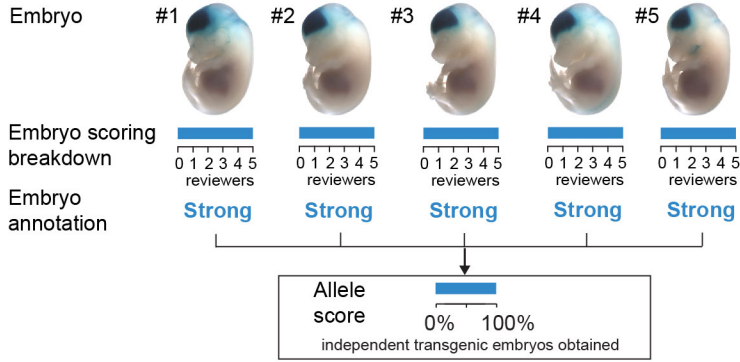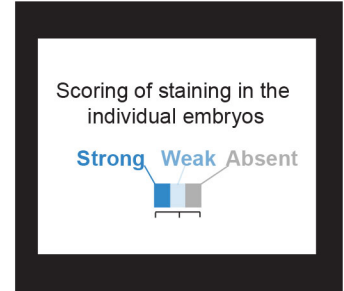

5% of bp mutated allele (#1)

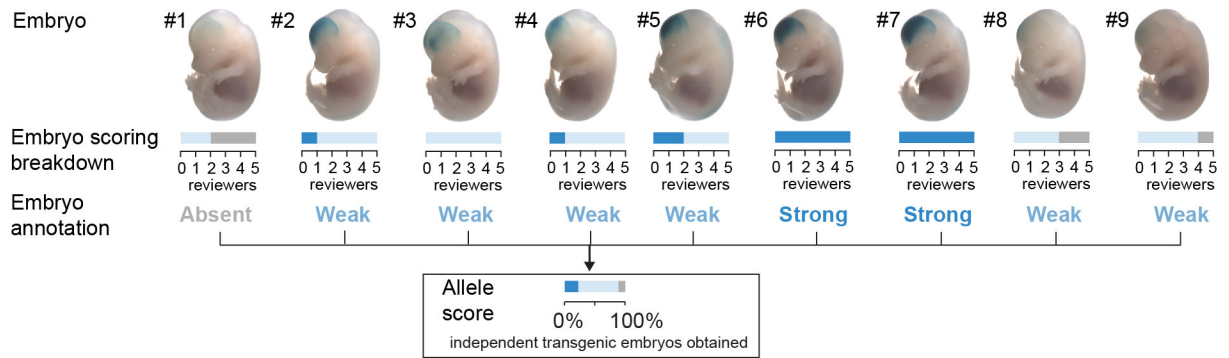

Examples shown for calibration

Images used as guidelines to score the strength of enhancer activity in the forebrain

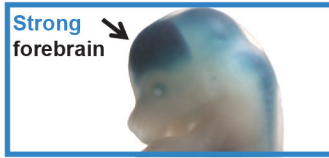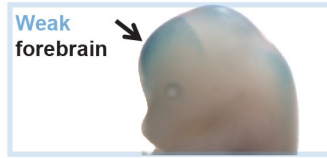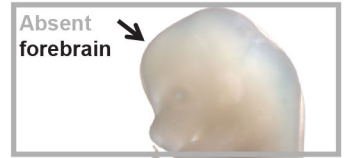

Reference allele

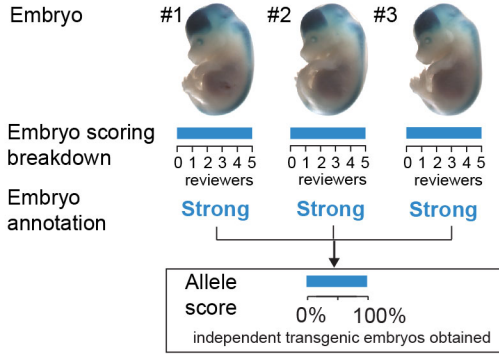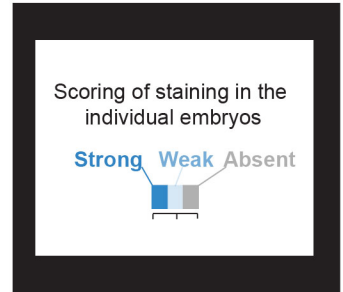

5% of bp mutated allele (#1)

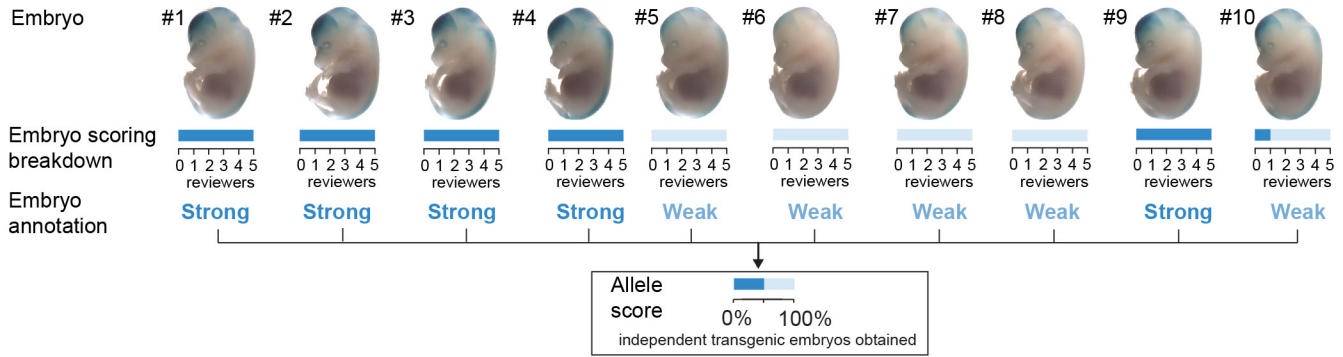



Examples shown for calibration

Images used as guidelines to score the strength of enhancer activity in the hindbrain / neural tube

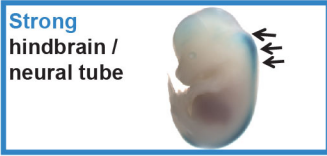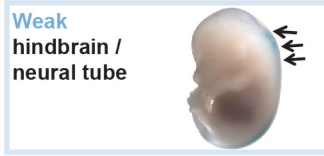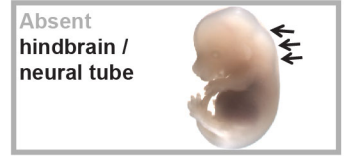

Reference allele

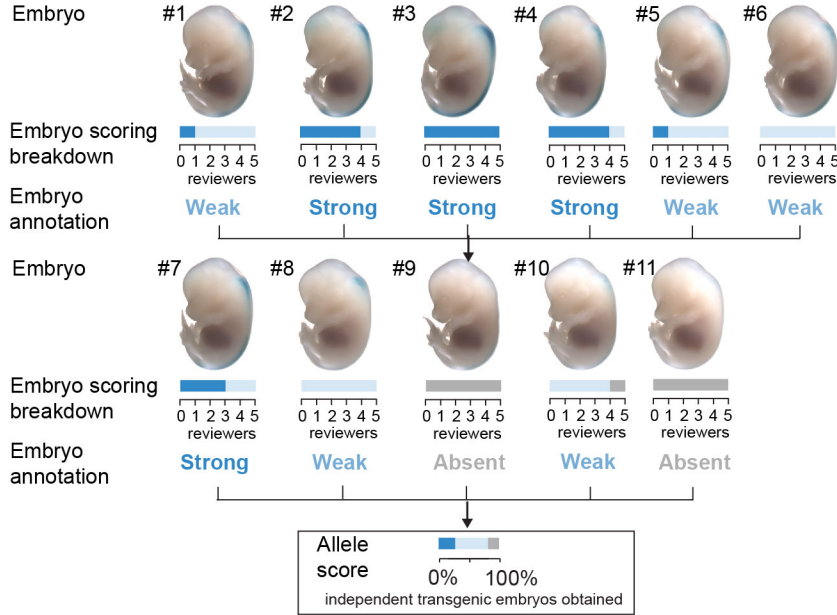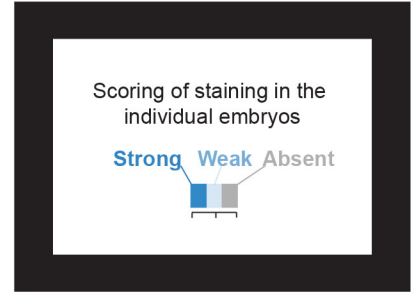

5% of bp mutated allele (#1)

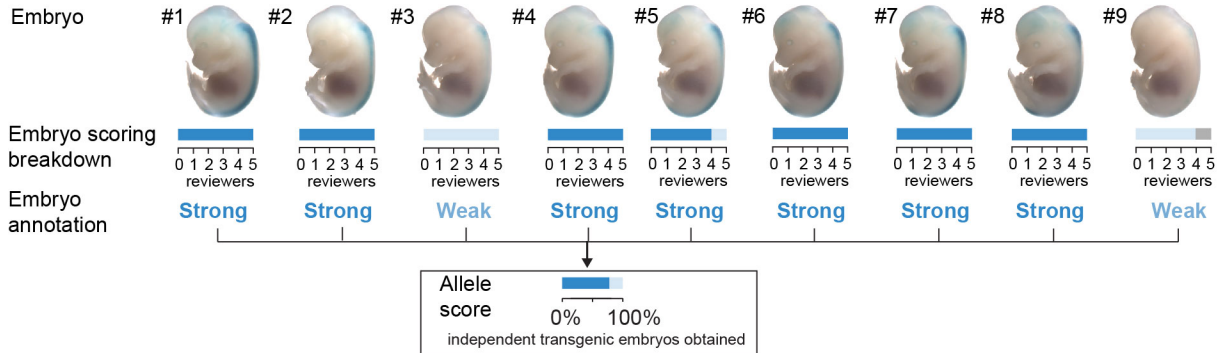

## Supplementary Figure 2 | Characterization of base pairs selected for mutagenesis for 23 ultraconserved enhancers.

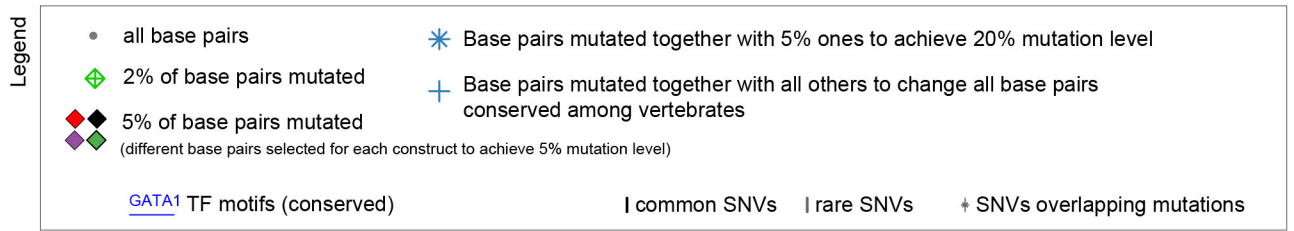

### hs110 - uc206

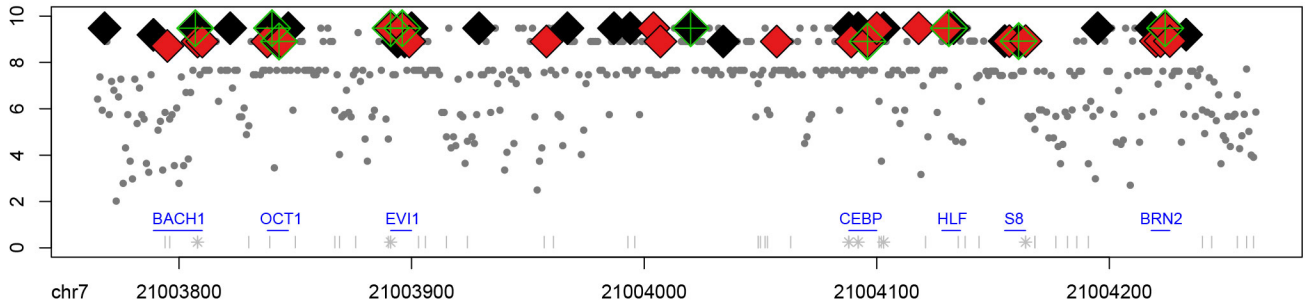

### hs111 - uc215

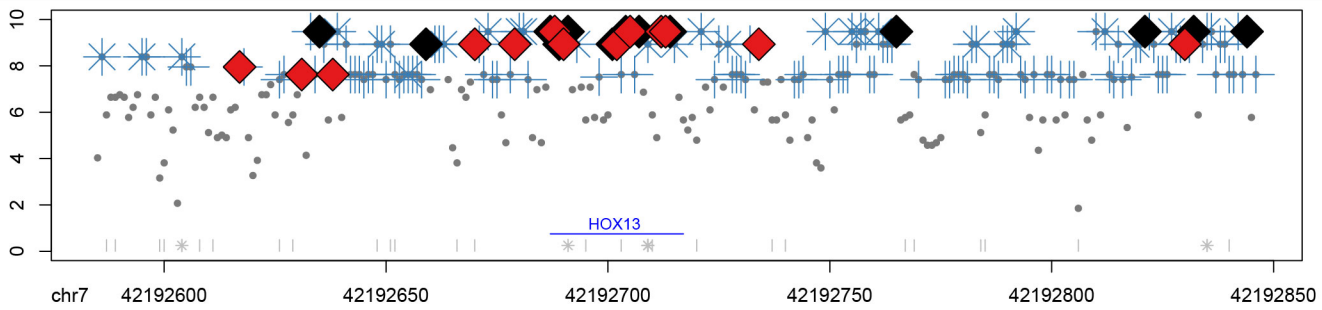

### hs119 - uc463-464-465

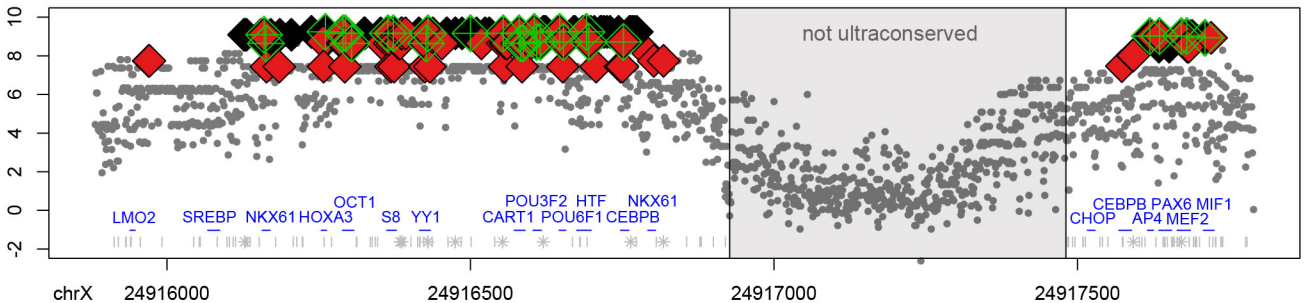

### hs121 - uc467

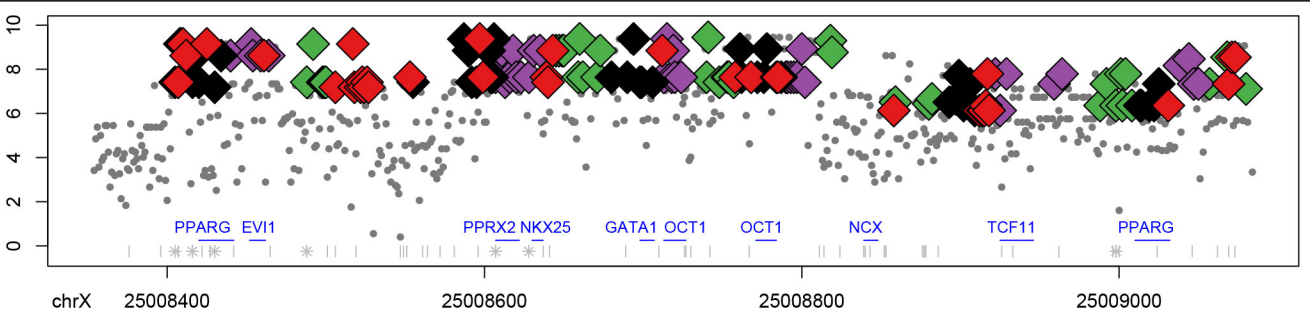

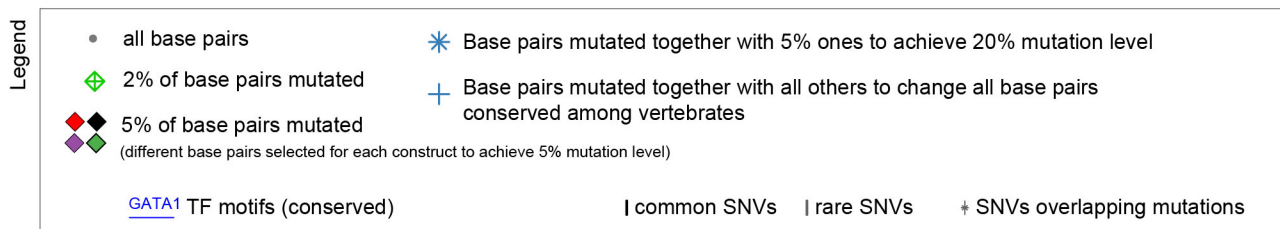

hs122 - uc468-469

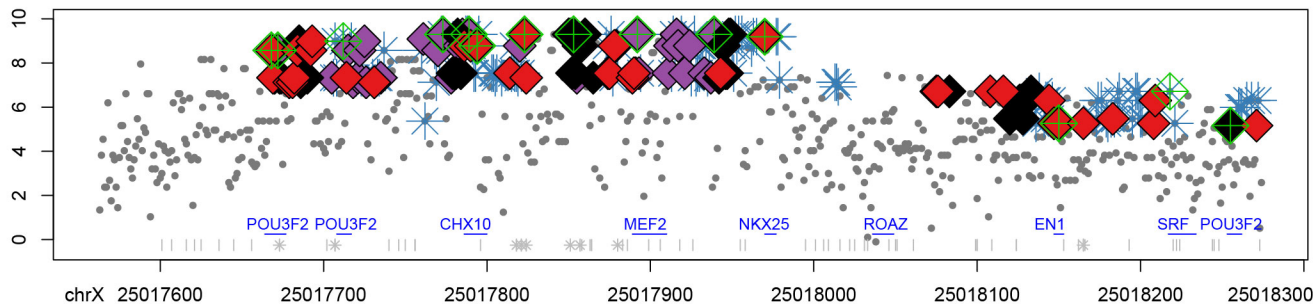

hs123 - uc470

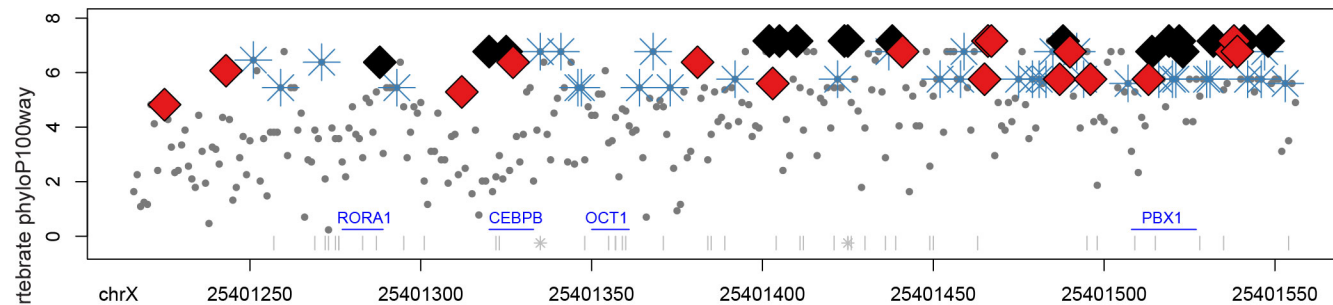

hs124 - uc396

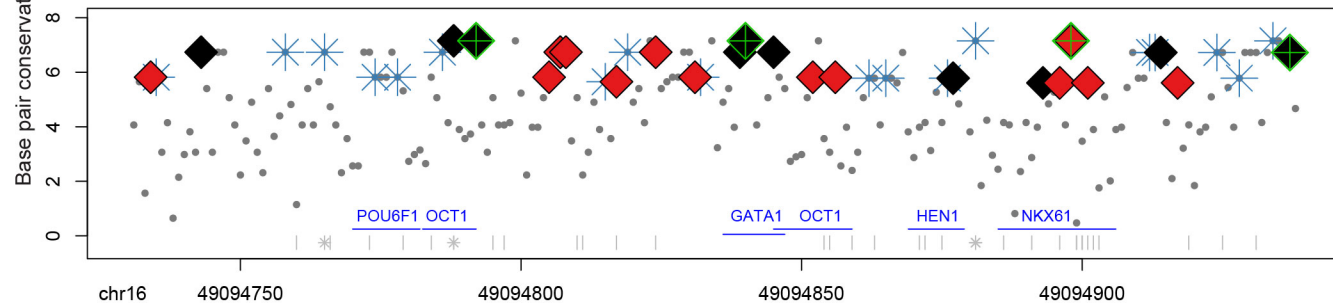

hs200 - uc025

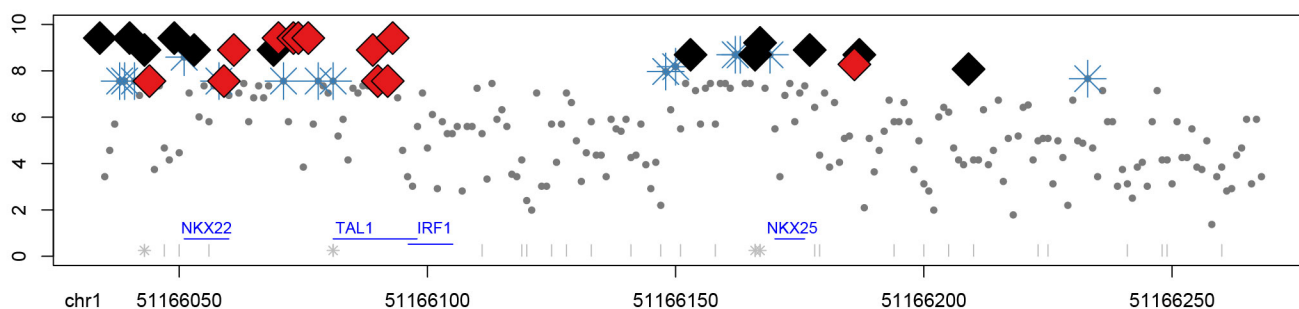

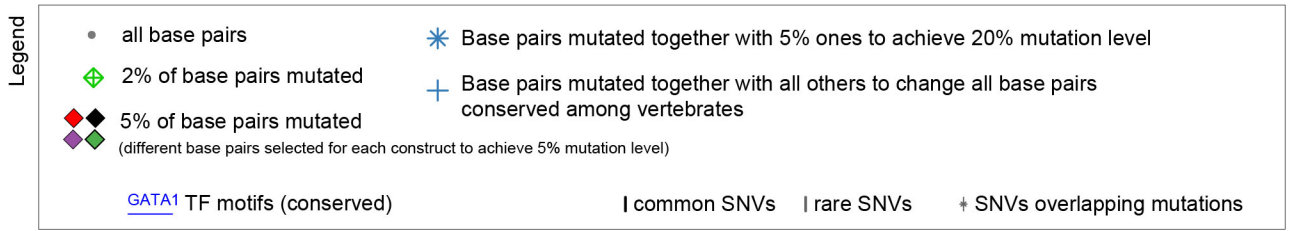

hs215 - uc152

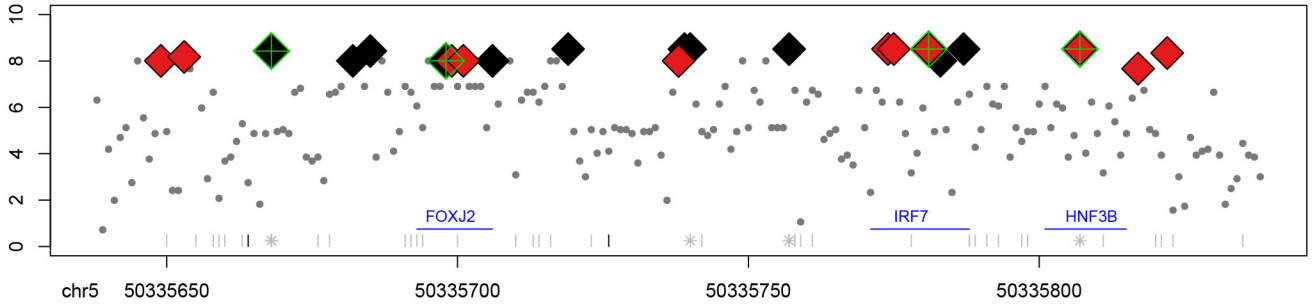

hs246 - uc108

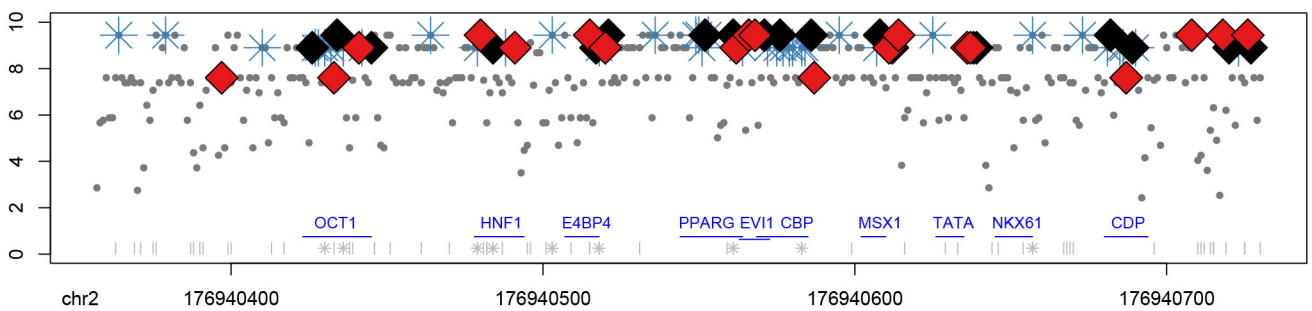

hs260 - uc145

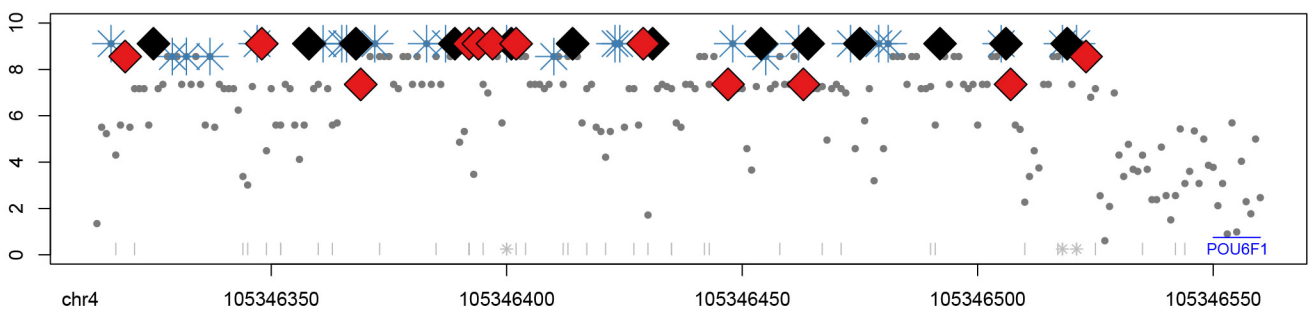

hs266 - uc163

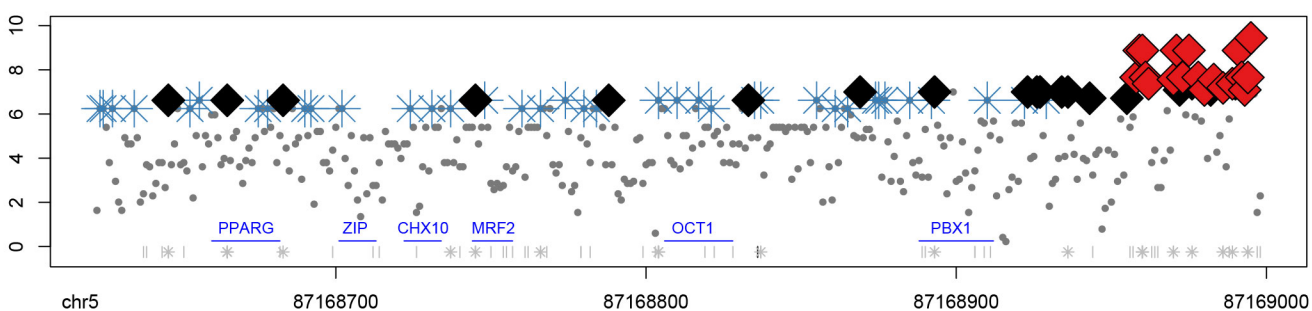



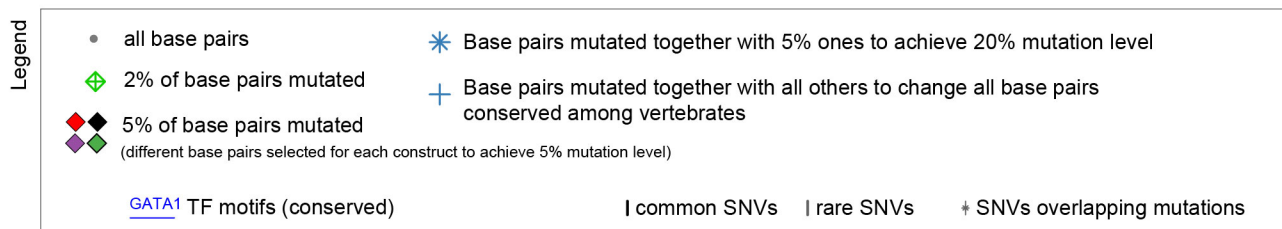

hs267 - uc164

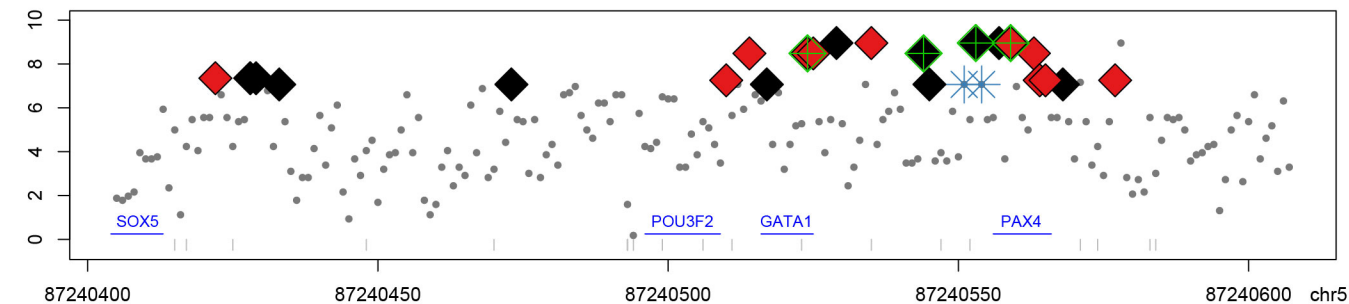

hs271 - uc170

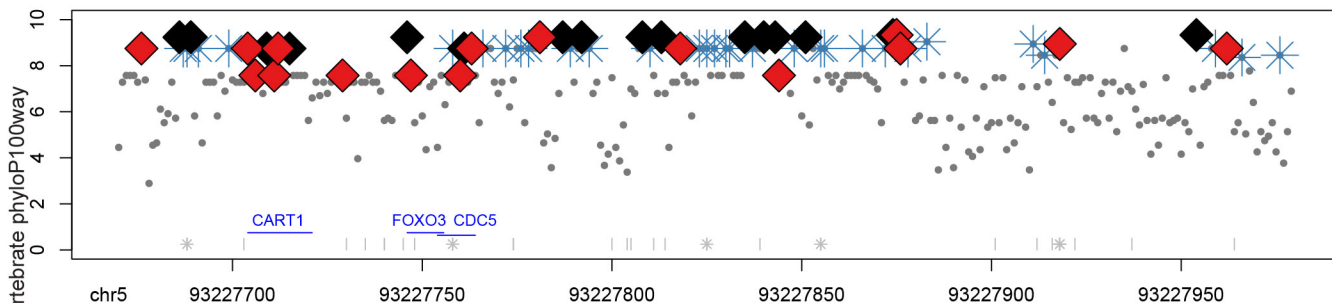

hs282 - uc196

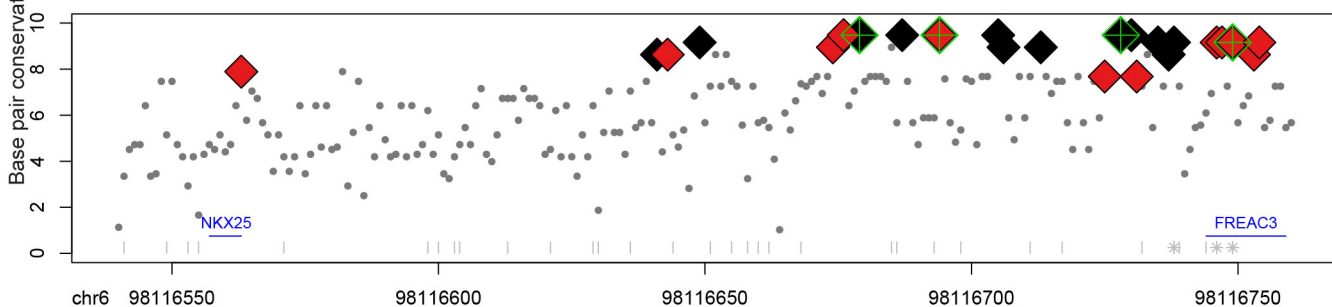

hs293 - uc204

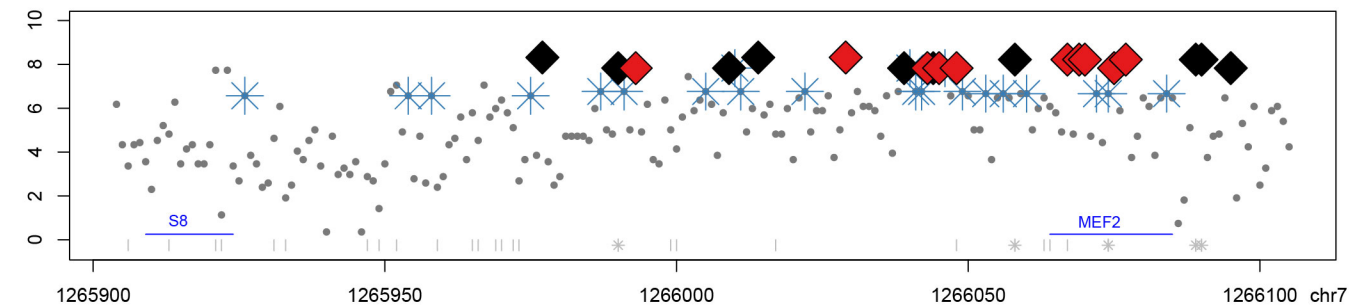

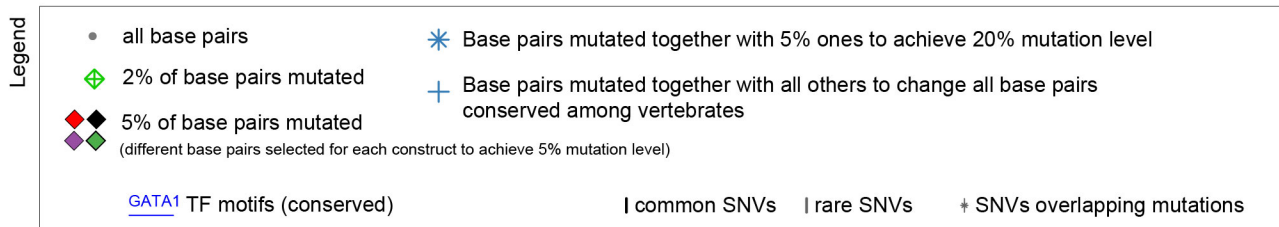

hs312 - uc260

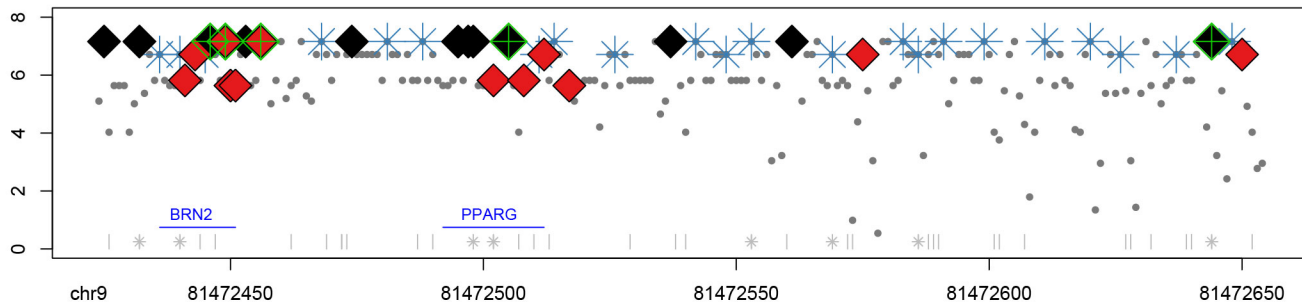

hs320 - uc288

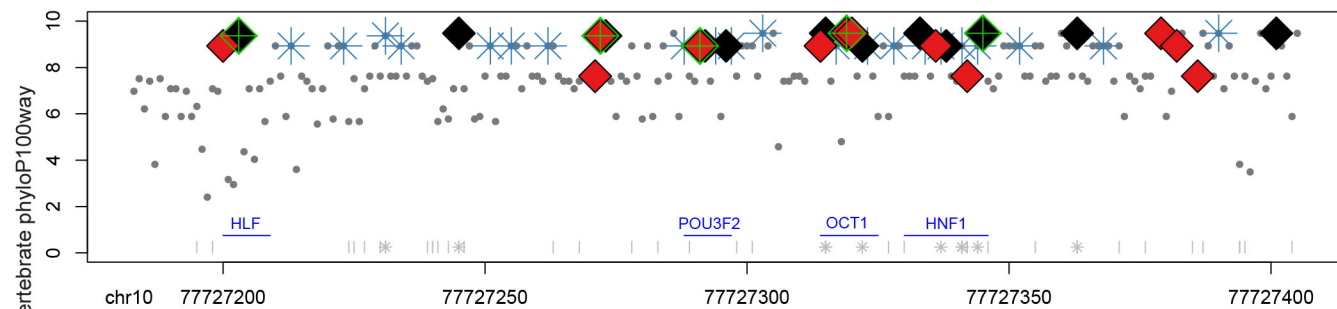

hs327 - uc31

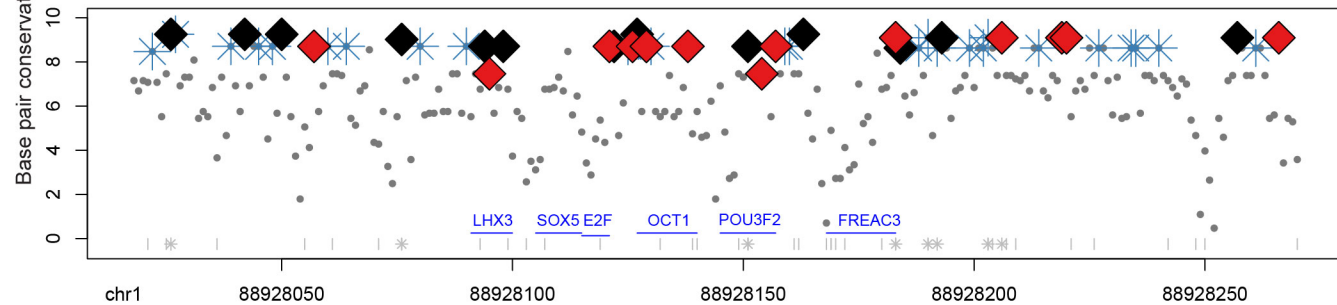

hs388 - uc47

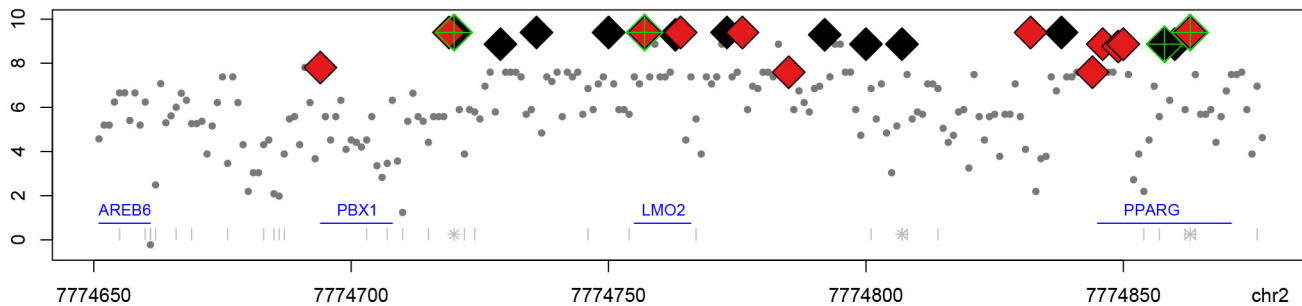

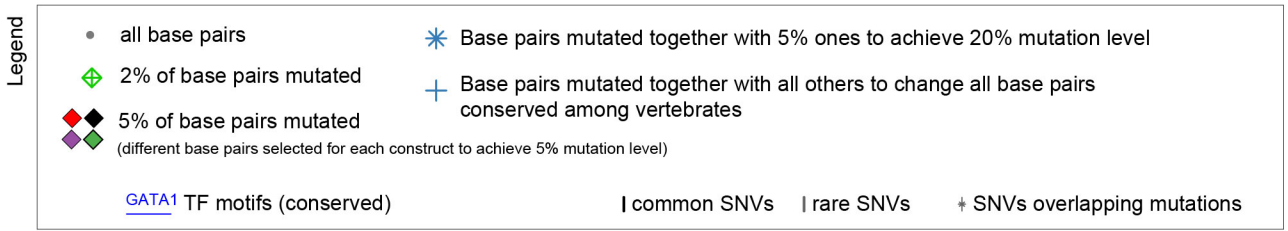

hs411 - uc82

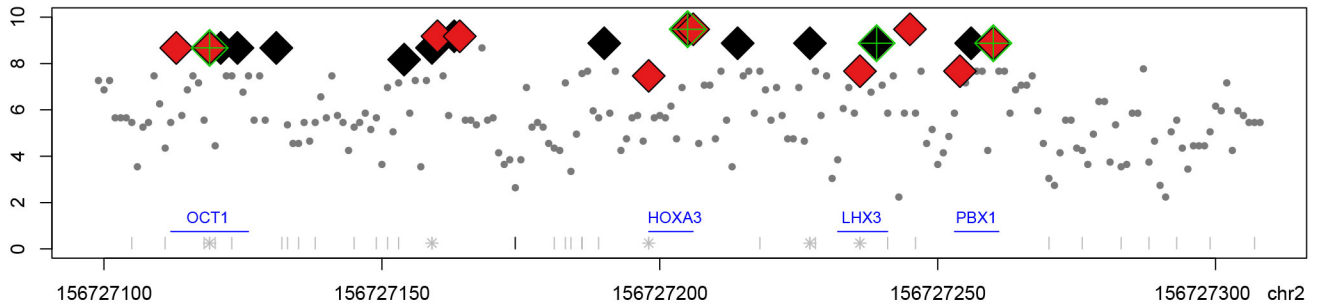

hs422 - uc98

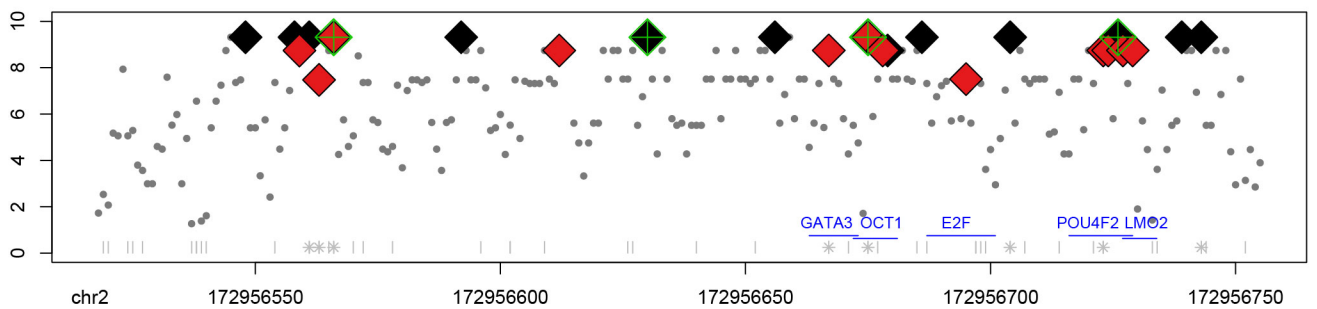

hs426 - uc4476

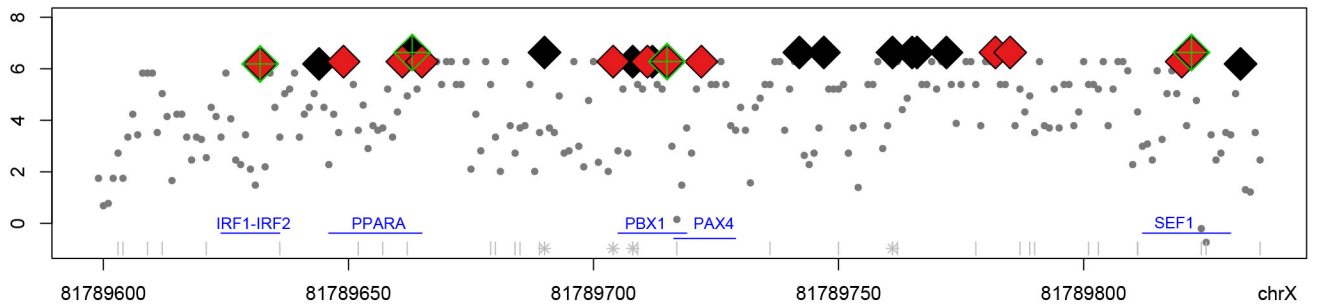

Supplement: NIHMS1674779-supplement-1674779_Supp_info.pdf [file NIHMS1674779-supplement-1674779_Supp_info.pdf]
